# Supplementary material for: Base-promoted thioannulation of o-alkynyl oxime ethers with sodium sulfide for the general synthesis of isothiocoumarins
Source: Royal Society of Chemistry journal article supplement (doi:10.1039/d1ob02012a), 2021-01-01
Supplement: d1ob02012a1.pdf [file d1ob02012a1.pdf]

# Base-Promoted Thioannulation of *o*-Alkynyl Oxime Ethers with Sodium Sulfide for the General Synthesis of Isothiocoumarins

Zhu-Zhu Zhang, Cai-Ling Sun, Xiao-Hong Zhang, \* Xing-Guo Zhang \*

College of Chemistry and Materials Engineering, Wenzhou University, Wenzhou 325035, China;

Guangxi Key Laboratory of Calcium Carbonate Resources Comprehensive Utilization, Hezhou University, Hezhou 542899, China;

E-Mail: [kamenzxh@wzu.edu.cn](mailto:kamenzxh@wzu.edu.cn)

## Supporting Information

### List of Contents

#### Contents:

1. The GC-MS analysis of control experiments -----S2
2. NMR spectra for all compounds **1aa-1bb**, **2-32**, **D-2**-----S3-S64
3. X-ray crystal structure and data of compound **3**-----S65-S66

# 1. The GC-MS analysis of control experiments

eq. 1:

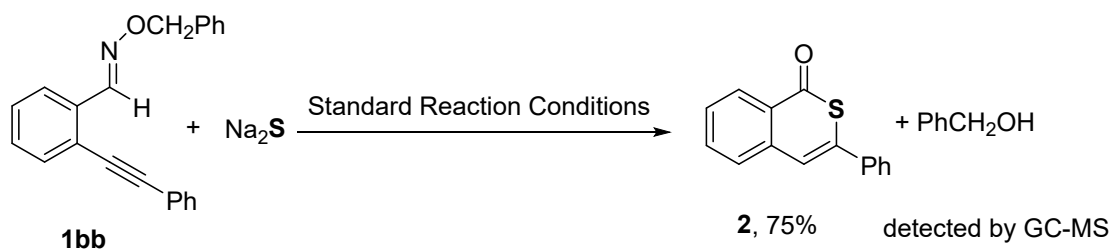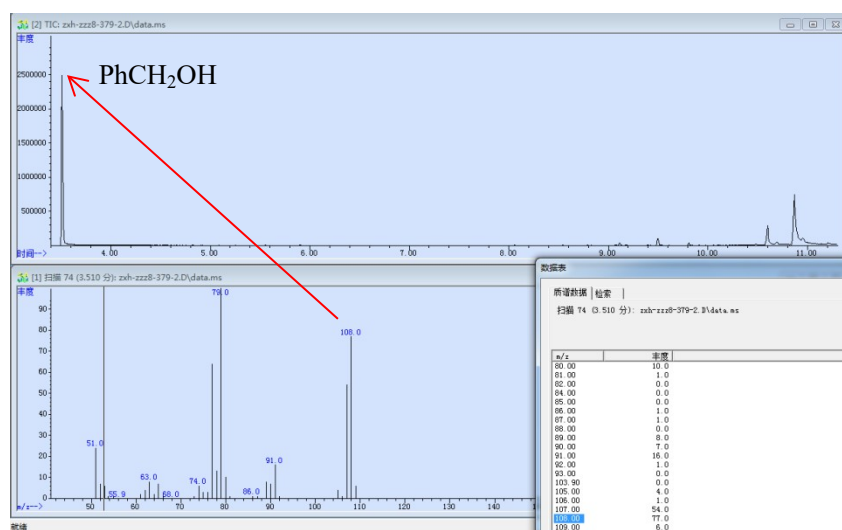

eq. 4: O<sup>18</sup>-2 GC analysis

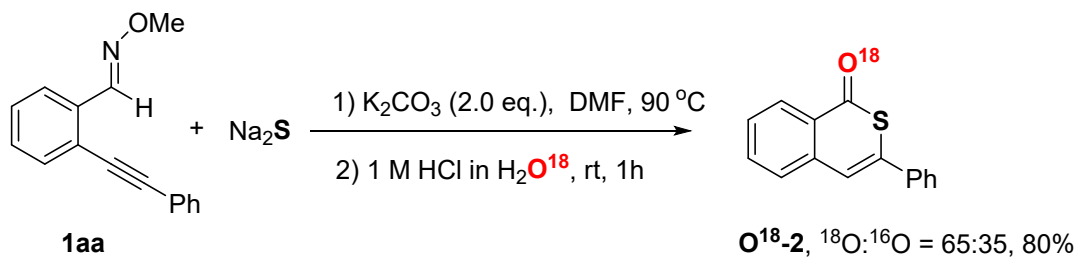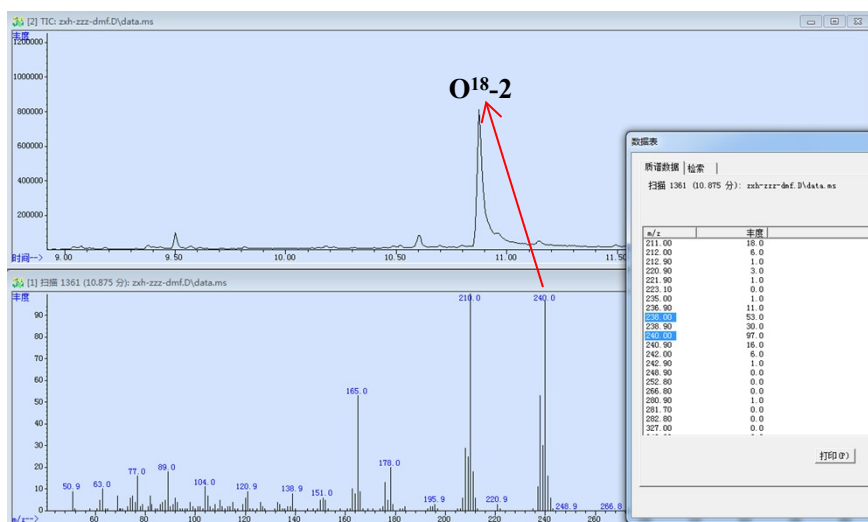

## 2. NMR spectra for all compounds 1aa-1bb, 2-32 and D-2

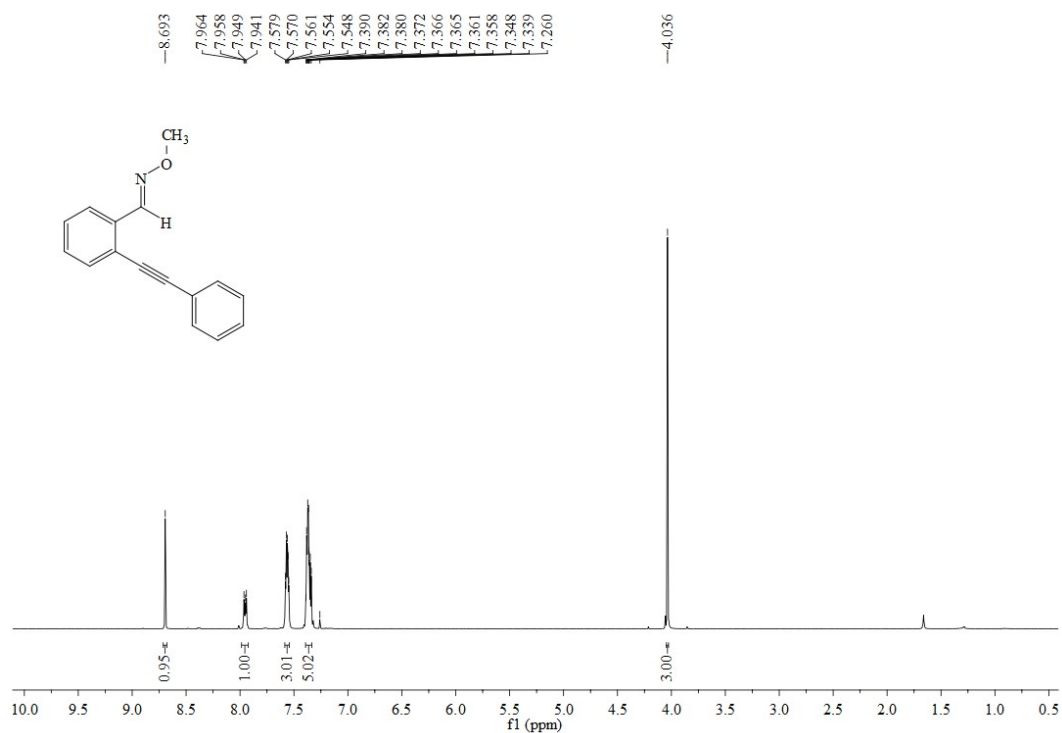

**<sup>1</sup>H NMR 400 MHz, in CDCl<sub>3</sub>: 2-(phenylethynyl)benzaldehyde O-methyl oxime (1aa)**

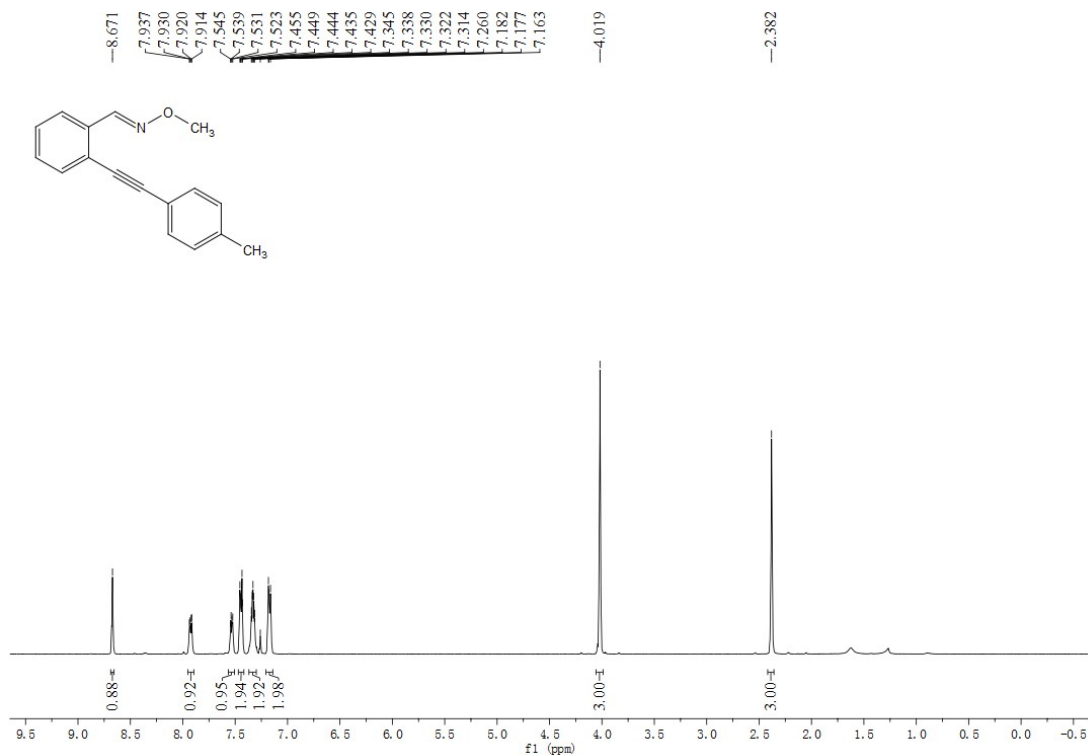

**<sup>1</sup>H NMR 400 MHz, in CDCl<sub>3</sub>: 2-(p-tolylethynyl)benzaldehyde O-methyl oxime (1ab)**

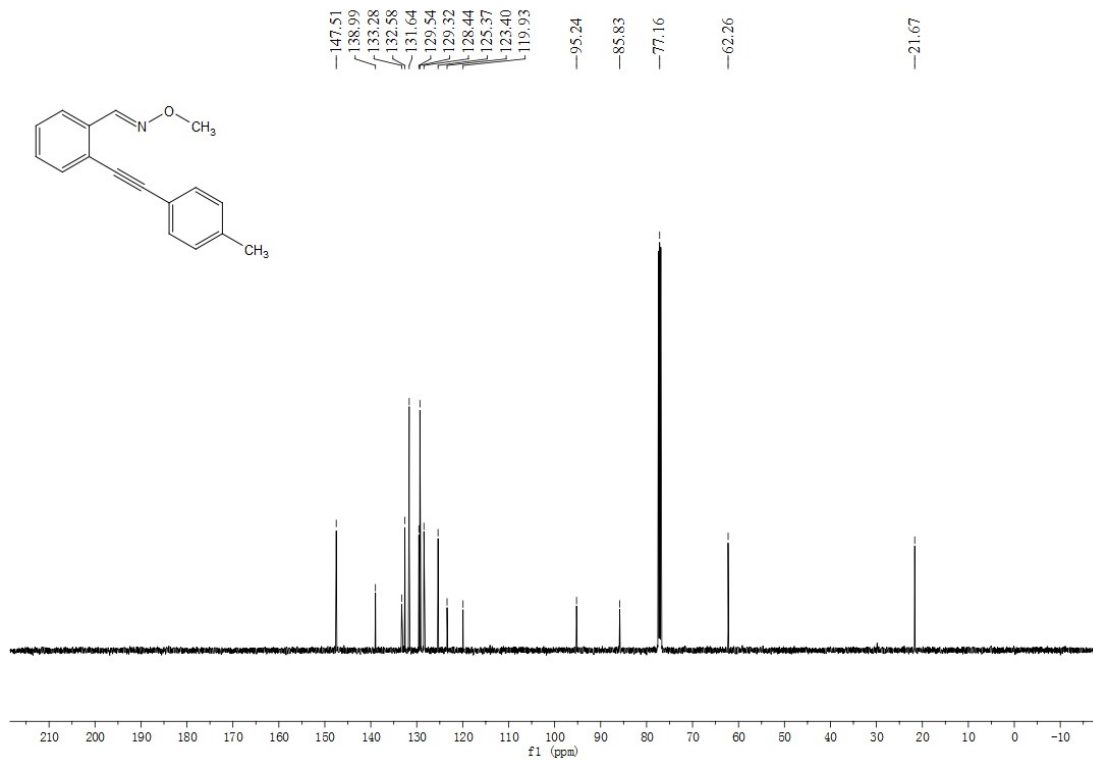

$^{13}\text{C}\{^1\text{H}\}$  NMR 125 MHz, in  $\text{CDCl}_3$ : 2-(p-tolyethynyl)benzaldehyde O-methyl oxime (1ab)

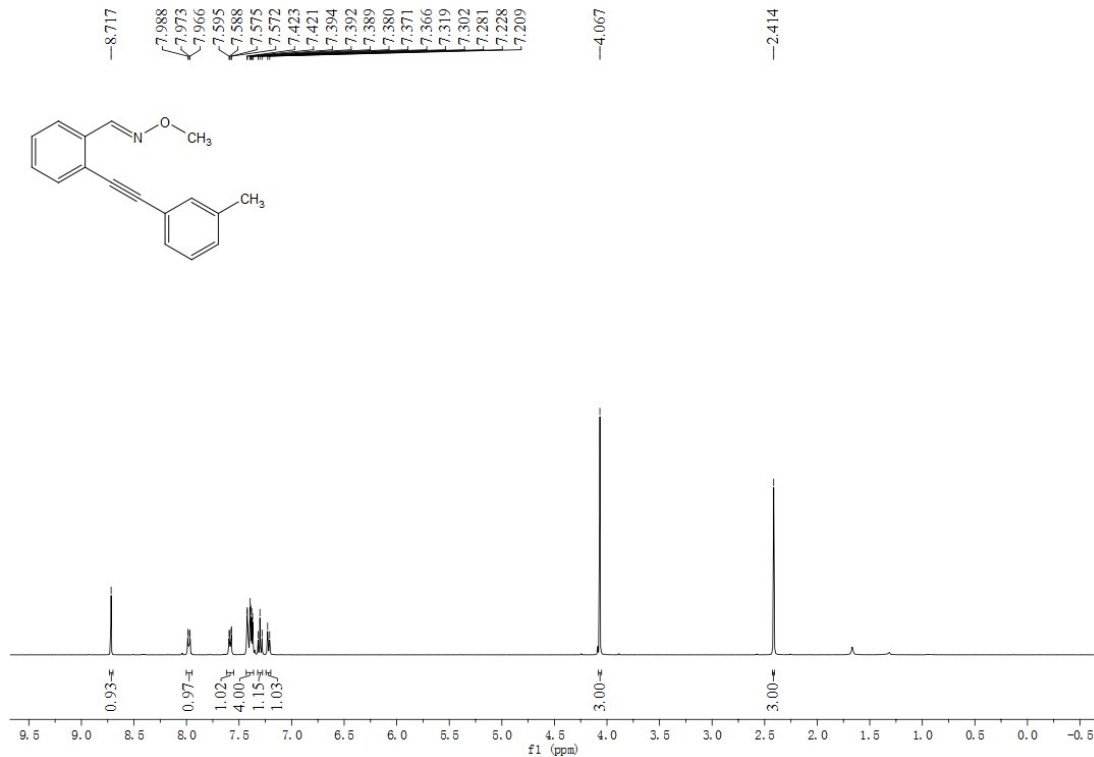

$^1\text{H}$  NMR 400 MHz, in  $\text{CDCl}_3$ : 2-(m-tolyethynyl)benzaldehyde O-methyl oxime (1ac)

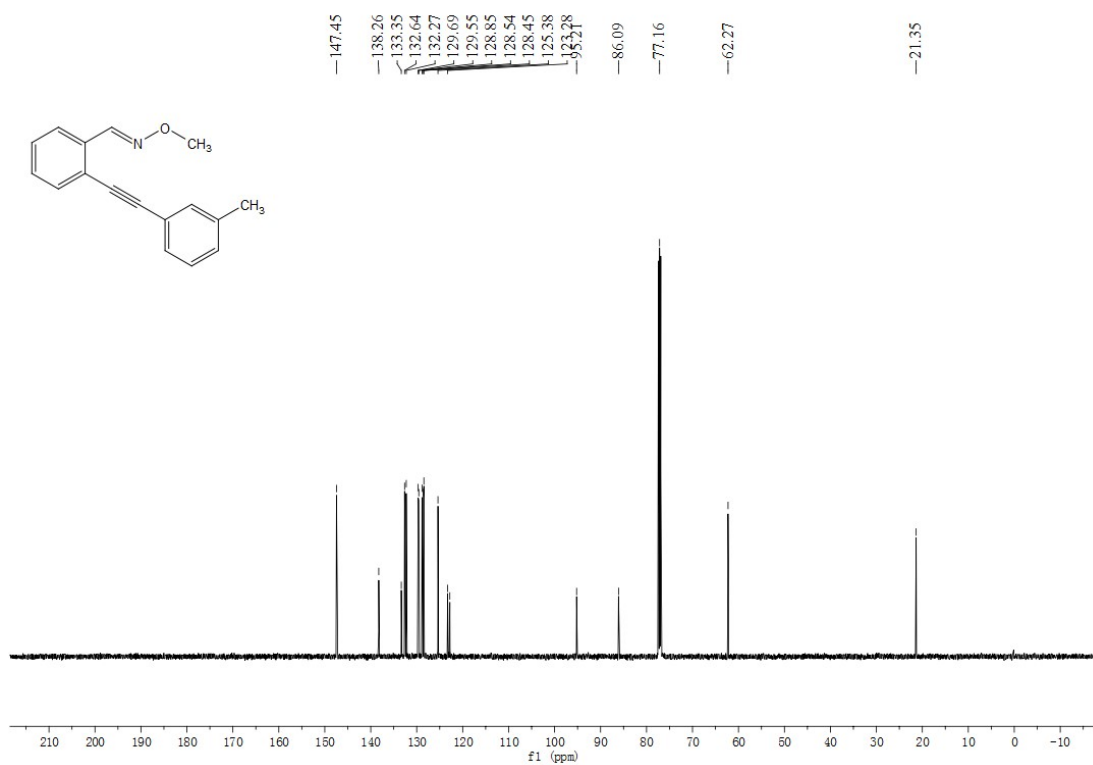

$^{13}\text{C}\{^1\text{H}\}$  NMR 125 MHz, in  $\text{CDCl}_3$ : 2-(m-tolylethynyl)benzaldehyde O-methyl oxime (1ac)

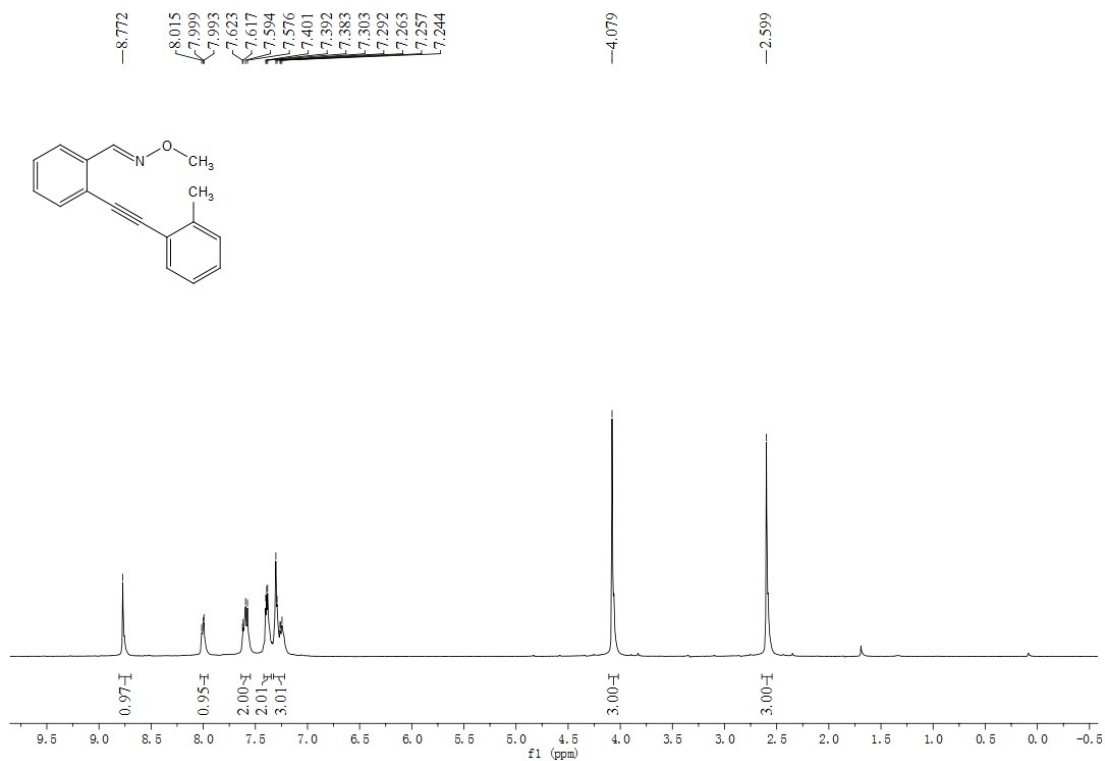

$^1\text{H}$  NMR 400 MHz, in  $\text{CDCl}_3$ : 2-(o-tolylethynyl)benzaldehyde O-methyl oxime (1ad)

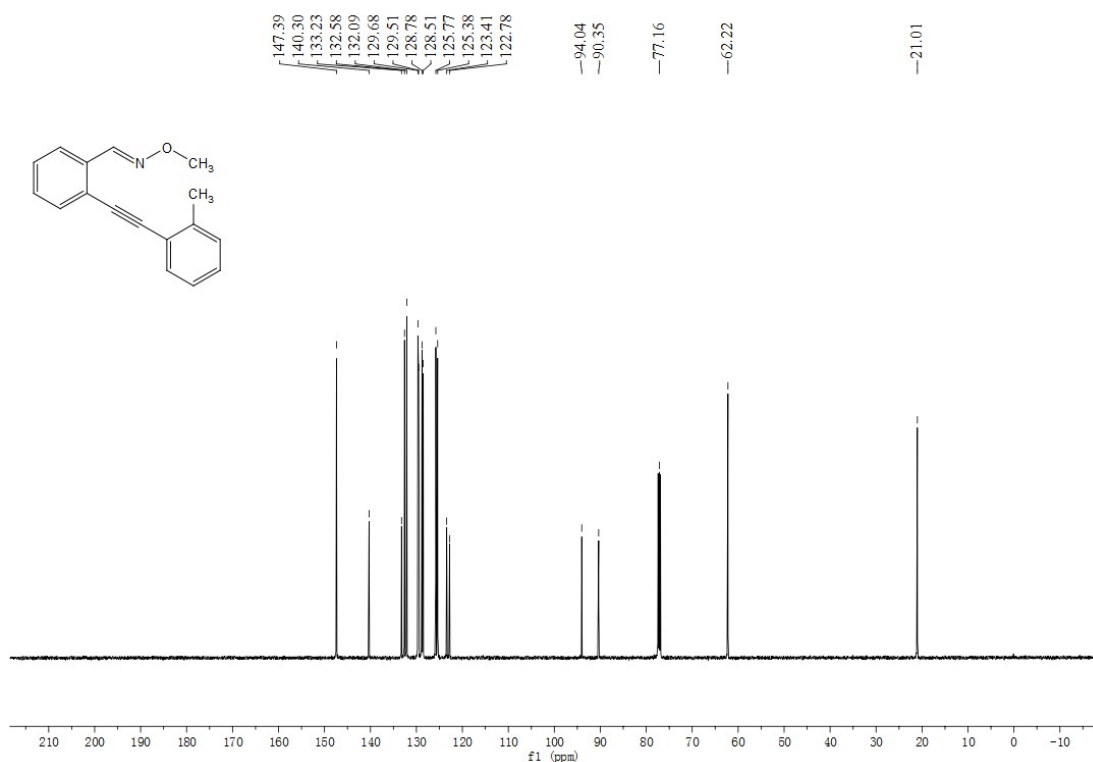

$^{13}\text{C}\{^1\text{H}\}$  NMR 125 MHz, in  $\text{CDCl}_3$ : 2-(o-tolylethynyl)benzaldehyde O-methyl oxime (1ad)

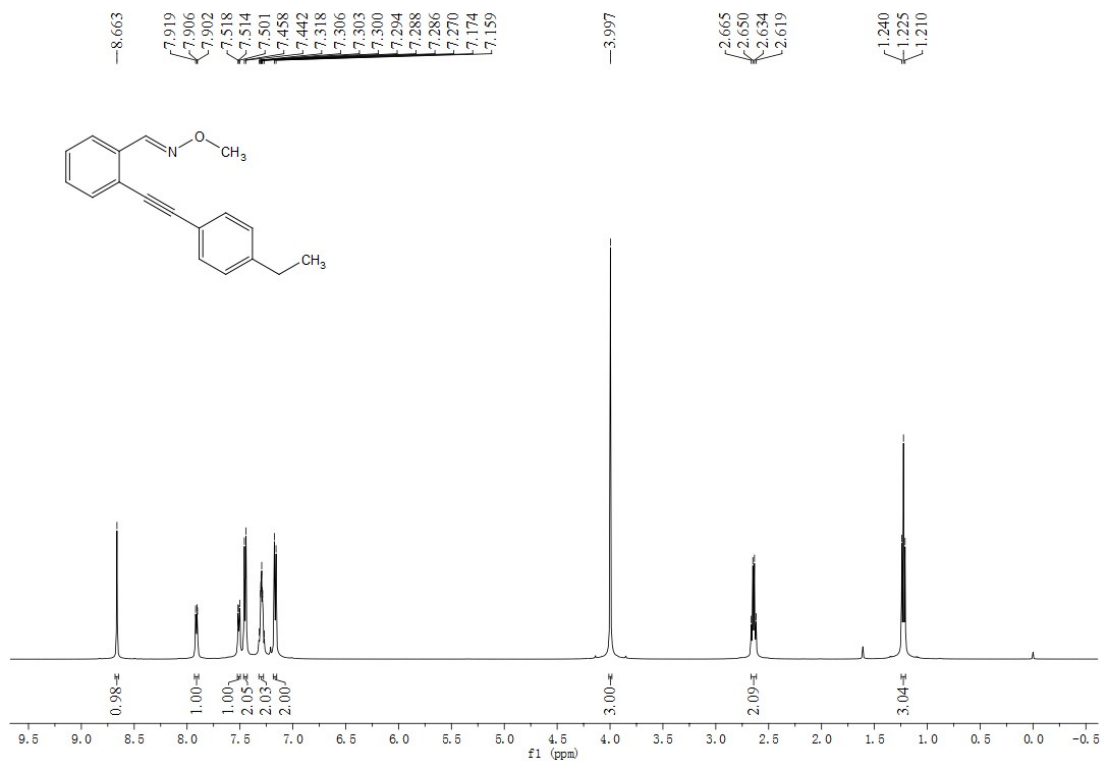

$^1\text{H}$  NMR 500 MHz, in  $\text{CDCl}_3$ : 2-((4-ethylphenyl)ethynyl)benzaldehyde O-methyl oxime (1ae)

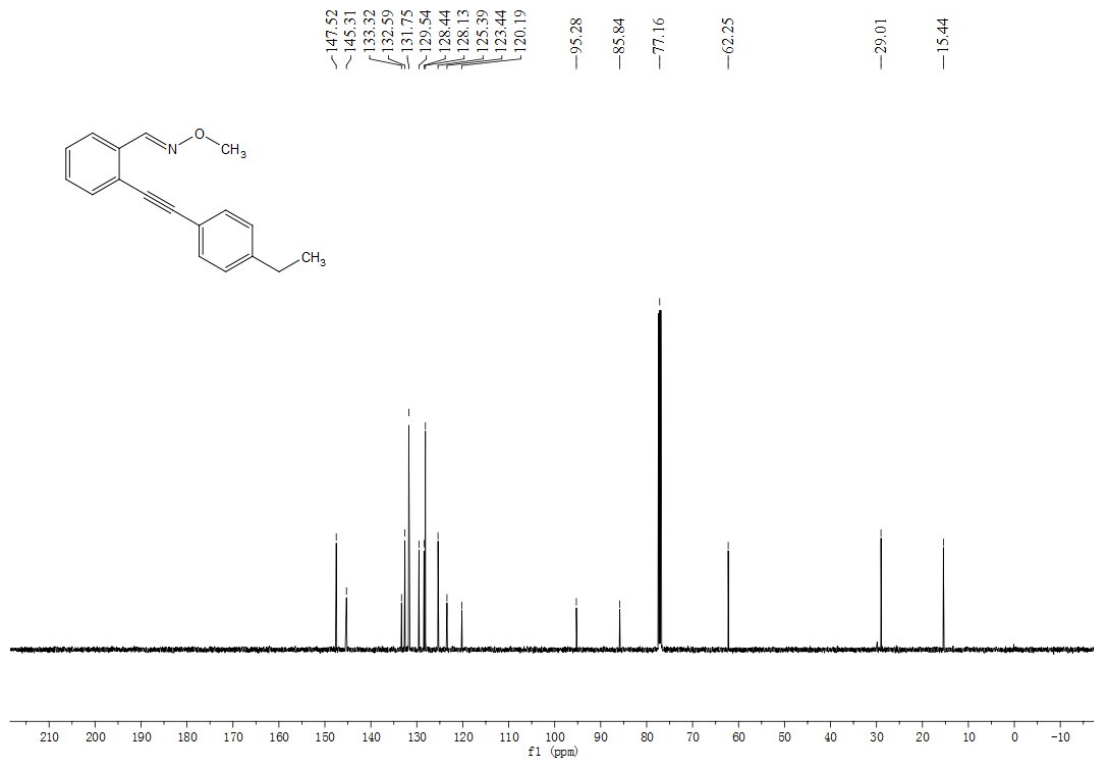

$^{13}\text{C}\{^1\text{H}\}$  NMR 125 MHz, in  $\text{CDCl}_3$ : 2-((4-ethylphenyl)ethynyl)benzaldehyde O-methyl oxime (1ae)

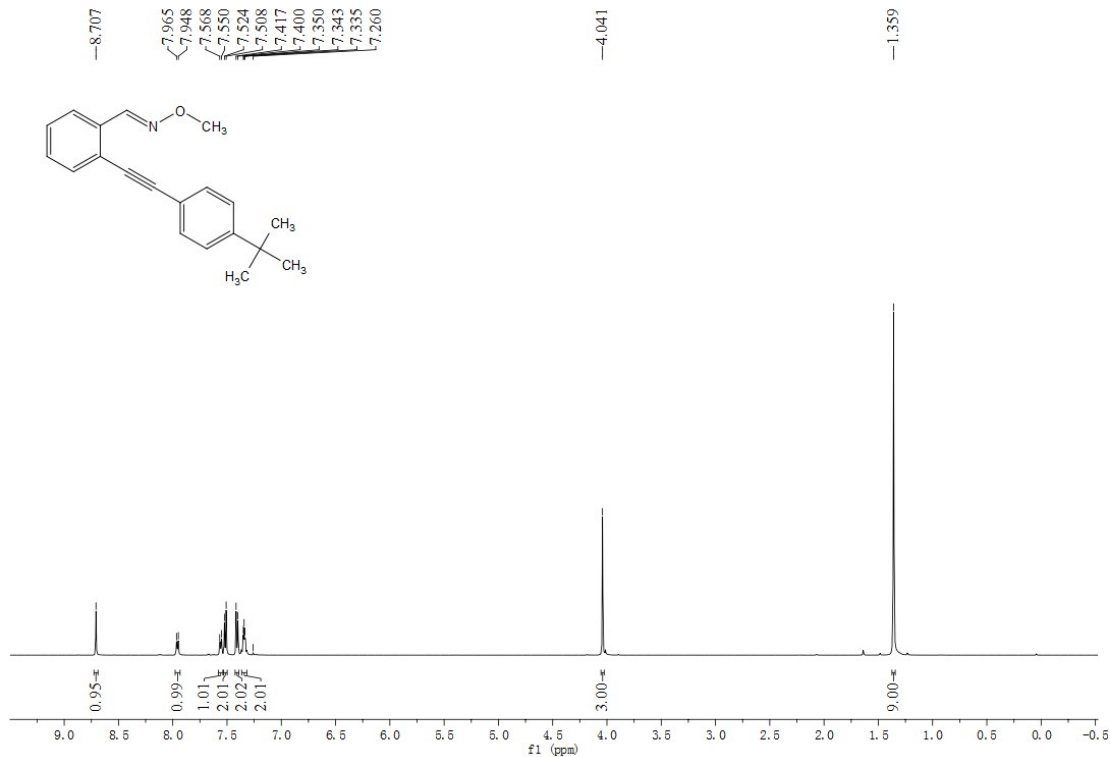

$^1\text{H}$  NMR 500 MHz, in  $\text{CDCl}_3$ : 2-((4-(tert-butyl)phenyl)ethynyl)benzaldehyde O-methyl oxime (1af)

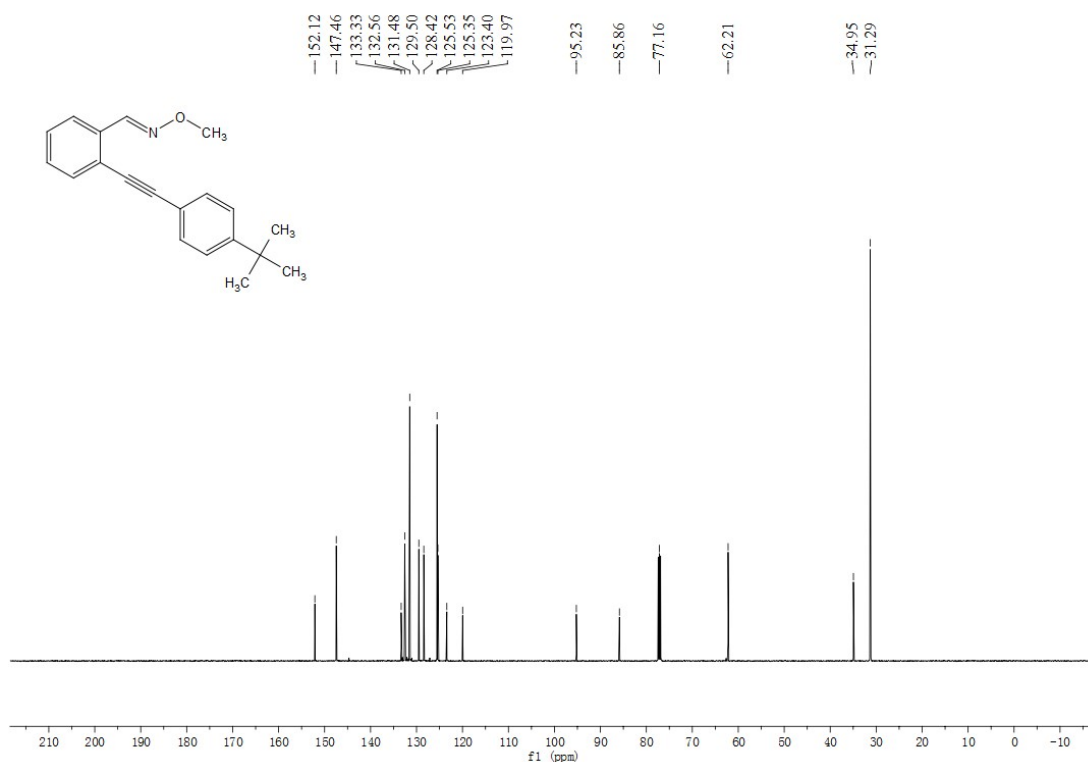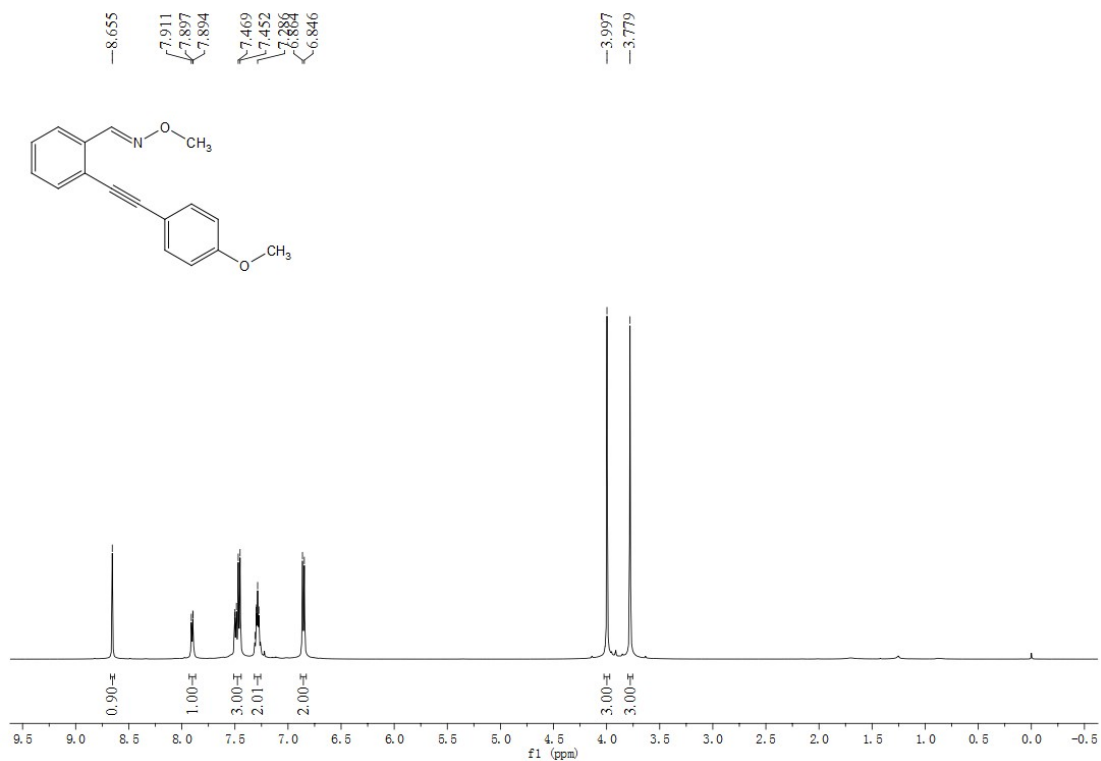



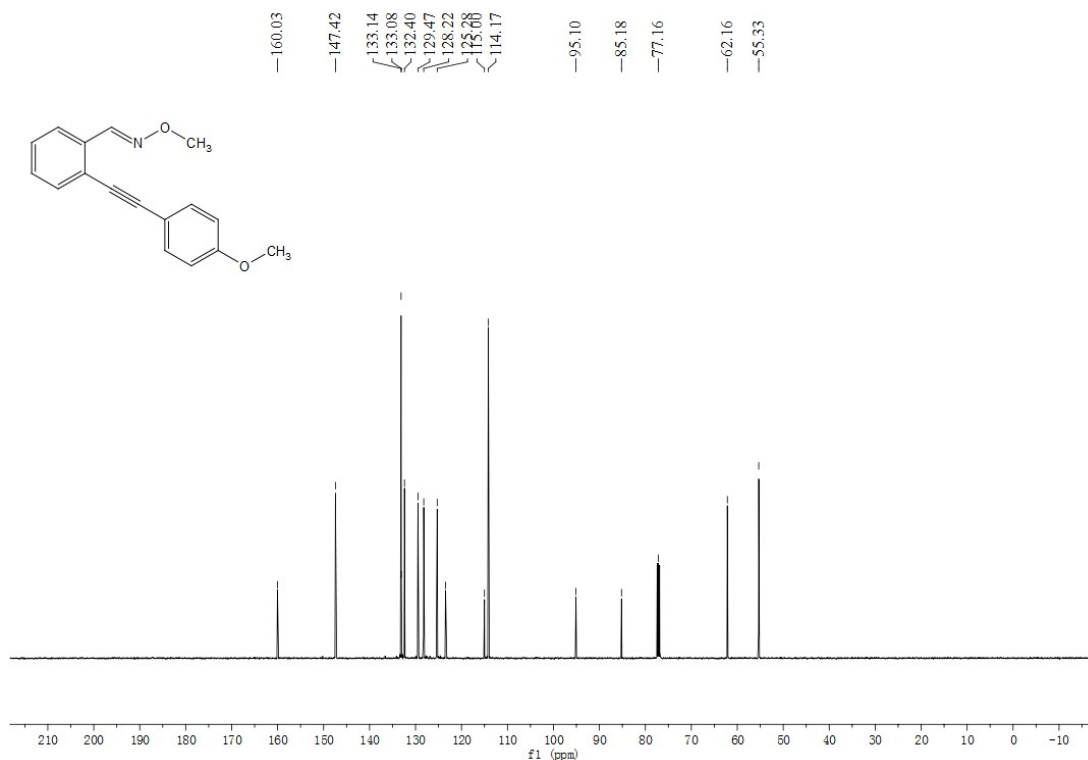

$^{13}\text{C}\{^1\text{H}\}$  NMR 125 MHz, in  $\text{CDCl}_3$ : 2-((4-methoxyphenyl)ethynyl)benzaldehyde O-methyl oxime (1ag)

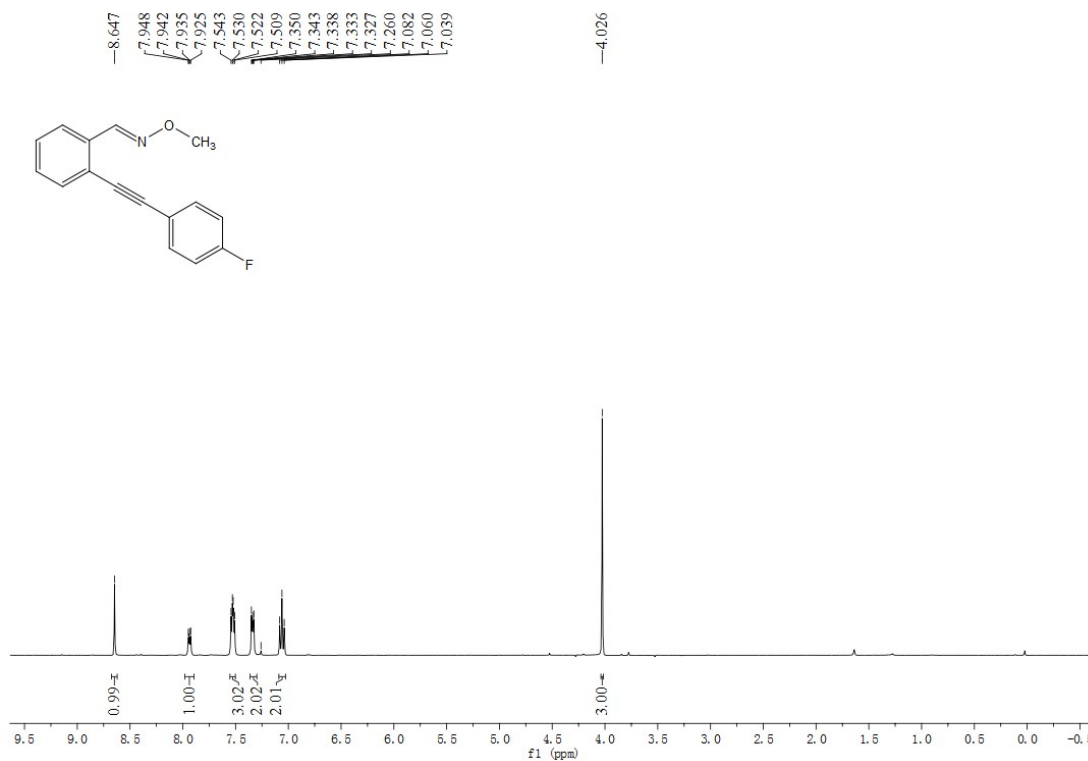

$^1\text{H}$  NMR 500 MHz, in  $\text{CDCl}_3$ : 2-((4-fluorophenyl)ethynyl)benzaldehyde O-methyl oxime (1ah)

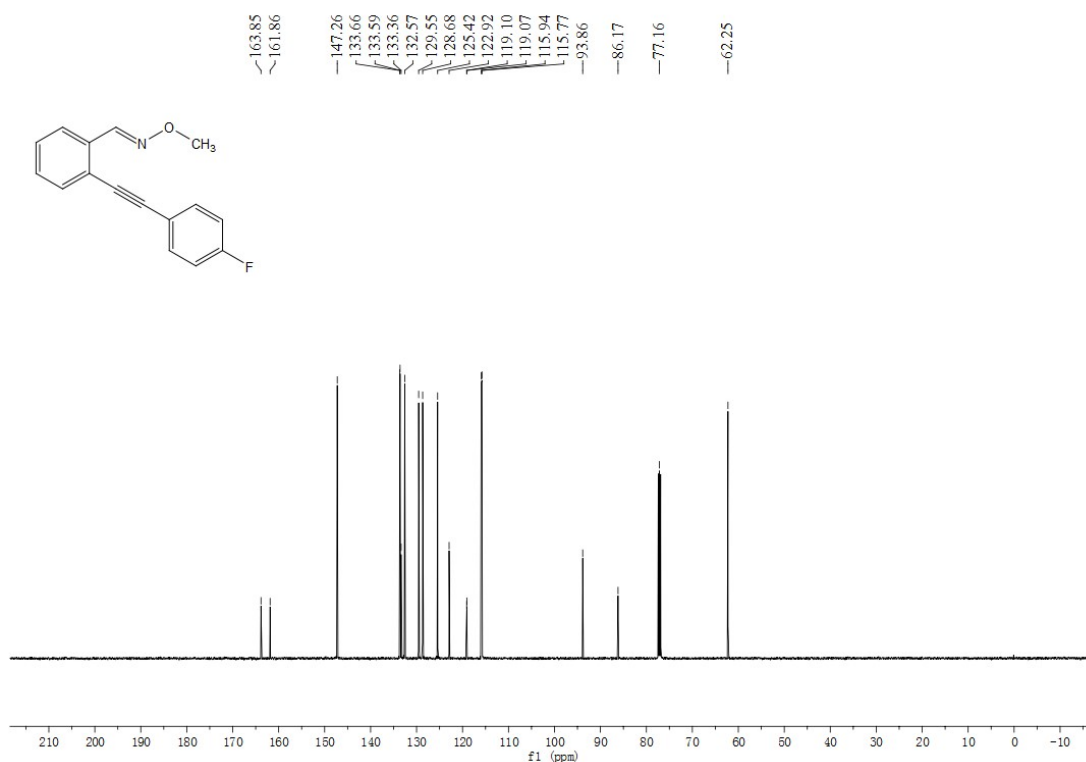

**<sup>13</sup>C{<sup>1</sup>H} NMR 125 MHz, in CDCl<sub>3</sub>: 2-((4-fluorophenyl)ethynyl)benzaldehyde O-methyl oxime (1ah)**

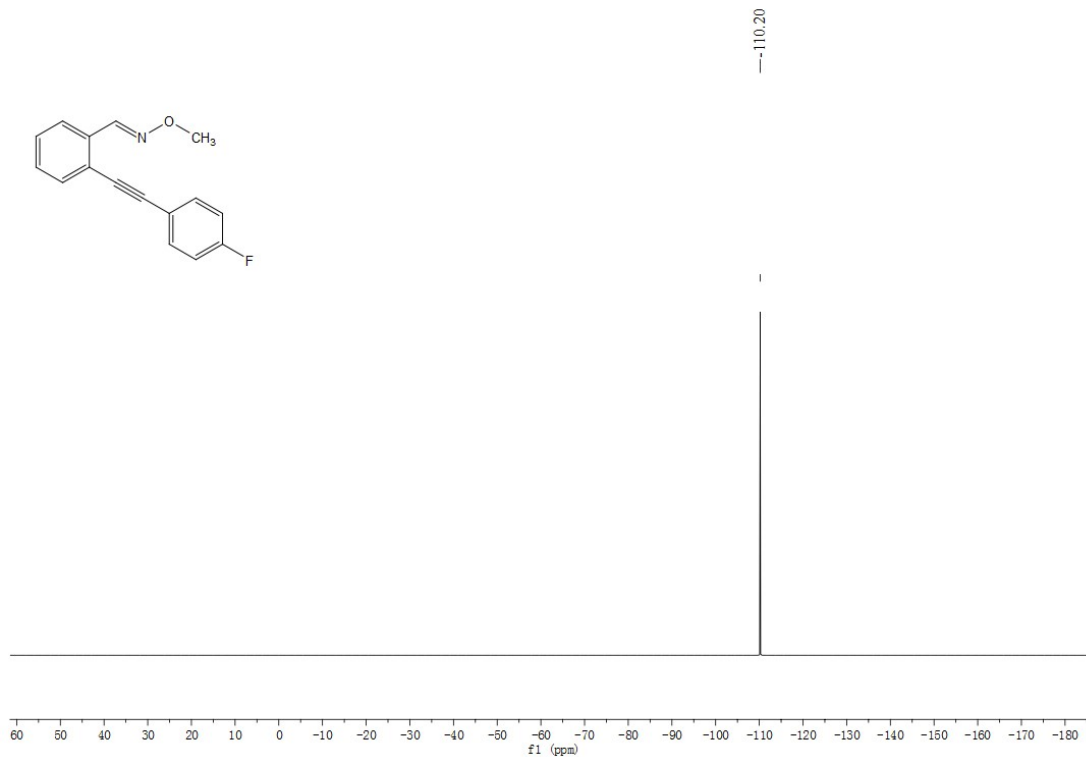

**<sup>19</sup>F NMR 470 MHz, in CDCl<sub>3</sub>: 2-((4-fluorophenyl)ethynyl)benzaldehyde O-methyl oxime (1ah)**

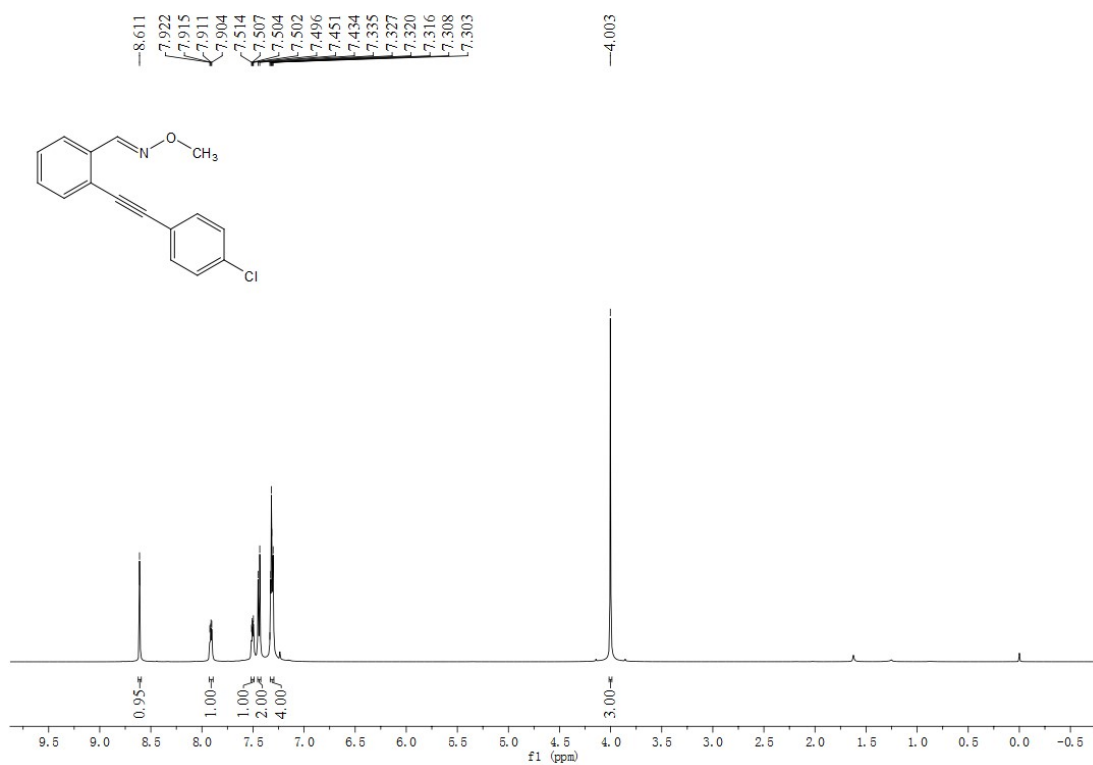

**$^1\text{H NMR}$  500 MHz, in  $\text{CDCl}_3$ : 2-((4-chlorophenyl)ethynyl)benzaldehyde O-methyl oxime (1ai)**

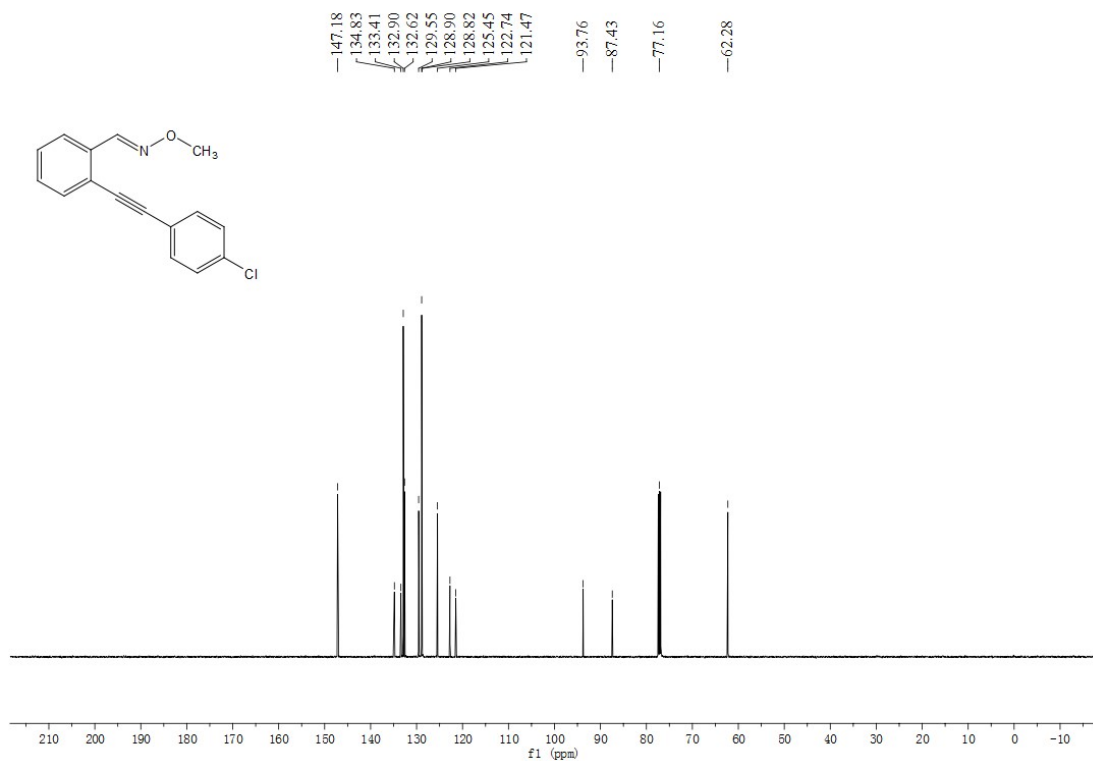

**$^{13}\text{C}\{^1\text{H}\}$  NMR 125 MHz, in  $\text{CDCl}_3$ : 2-((4-chlorophenyl)ethynyl)benzaldehyde O-methyl oxime (1ai)**

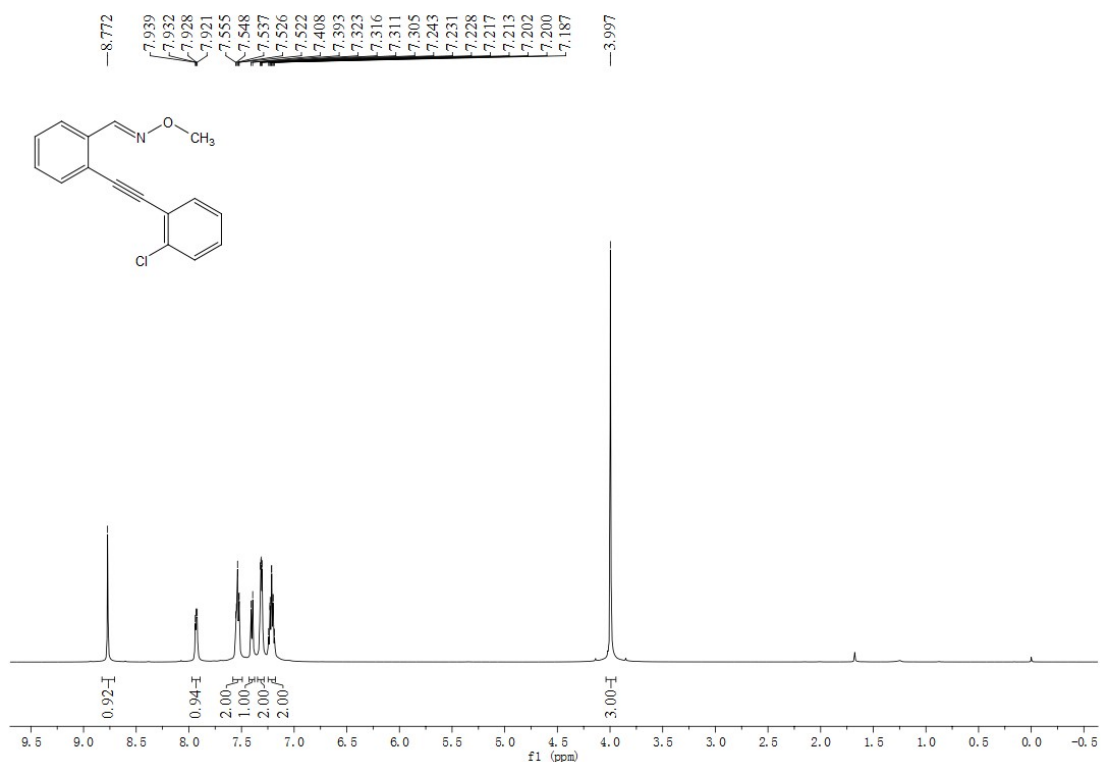

**<sup>1</sup>H NMR 500 MHz, in CDCl<sub>3</sub>: 2-((2-chlorophenyl)ethynyl)benzaldehyde O-methyl oxime (1aj)**

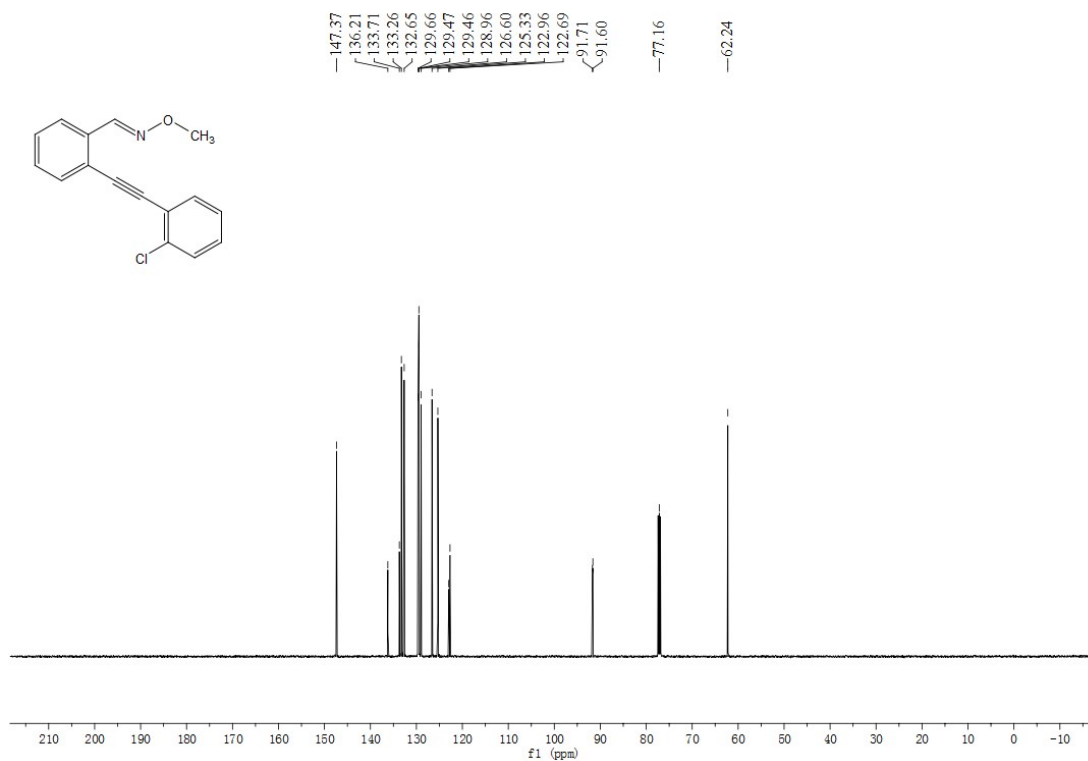

**<sup>13</sup>C{<sup>1</sup>H} NMR 125 MHz, in CDCl<sub>3</sub>: 2-((2-chlorophenyl)ethynyl)benzaldehyde O-methyl oxime (1aj)**

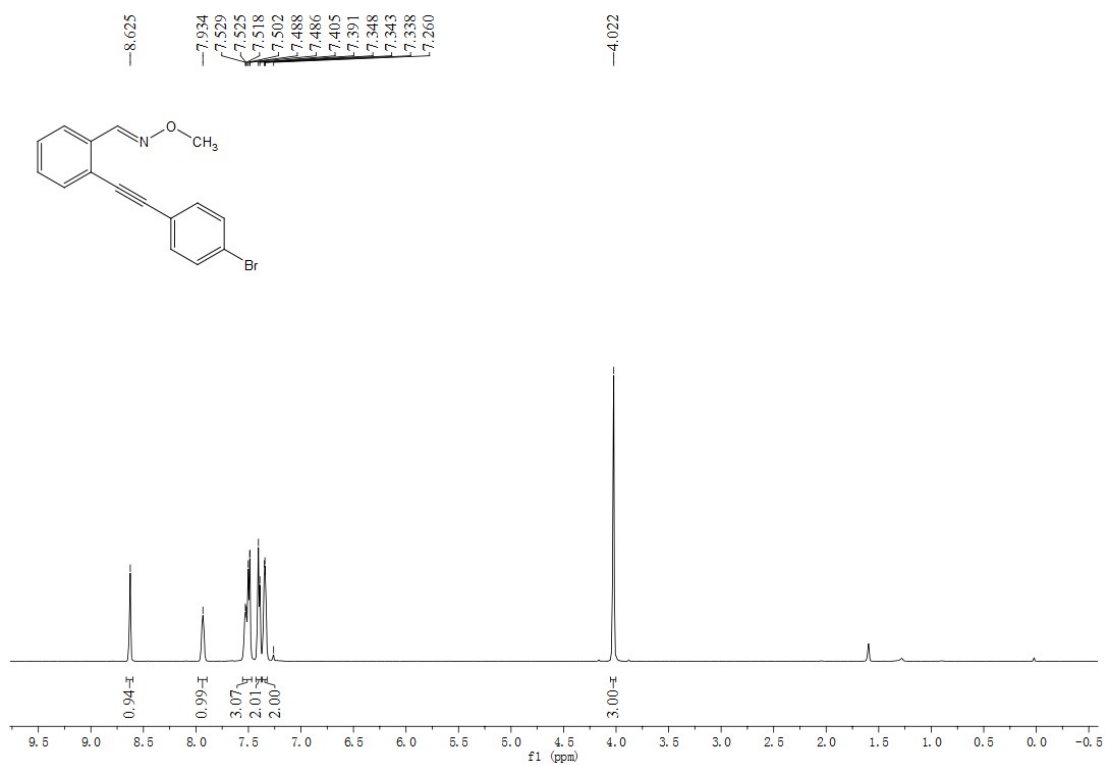

**<sup>1</sup>H NMR 500 MHz, in CDCl<sub>3</sub>: 2-((4-bromophenyl)ethynyl)benzaldehyde O-methyl oxime (1ak)**

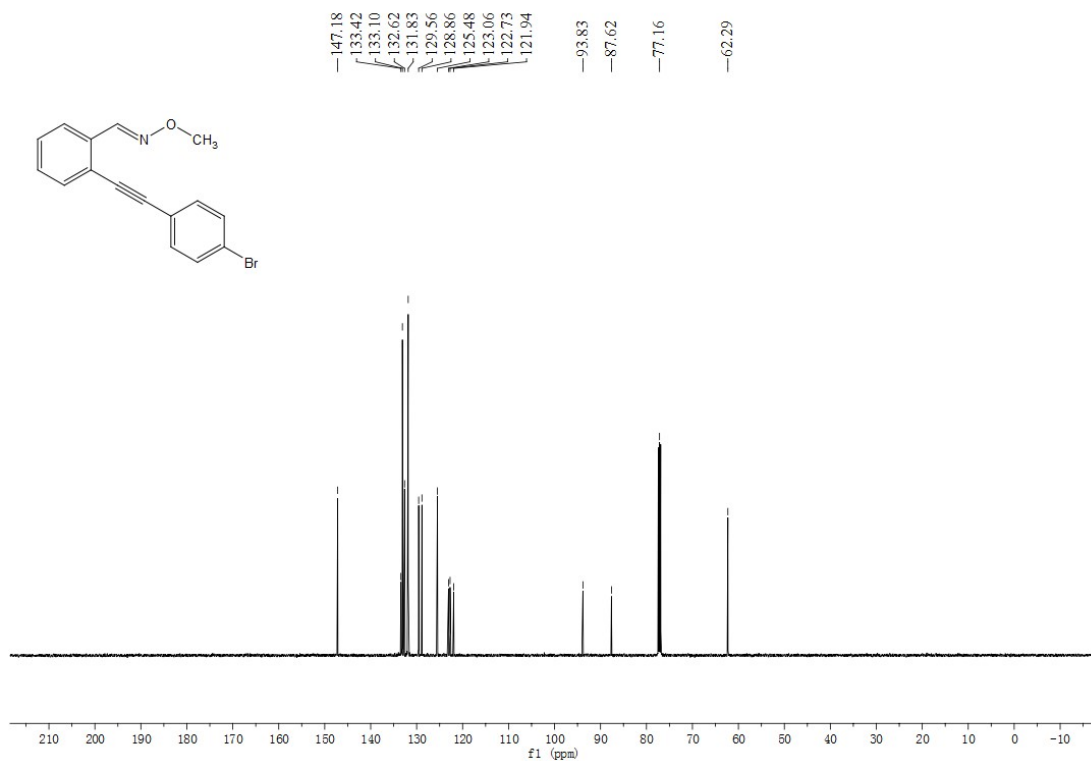

**<sup>13</sup>C{<sup>1</sup>H} NMR 125 MHz, in CDCl<sub>3</sub>: 2-((4-bromophenyl)ethynyl)benzaldehyde O-methyl oxime (1ak)**

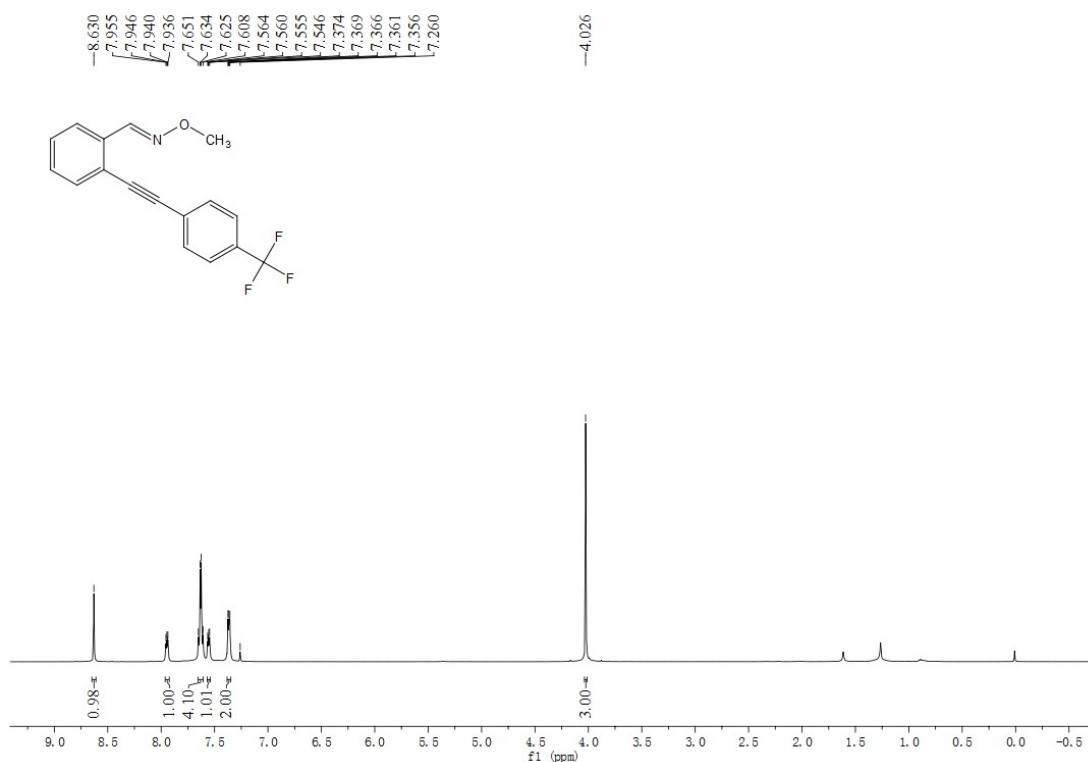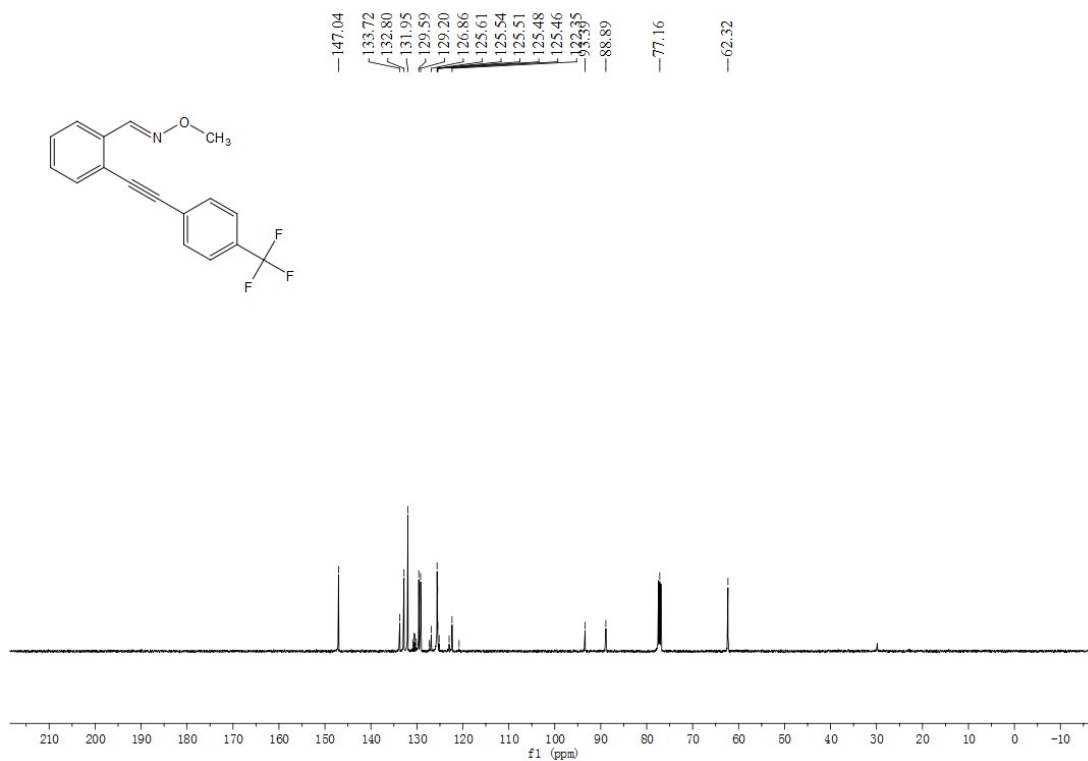

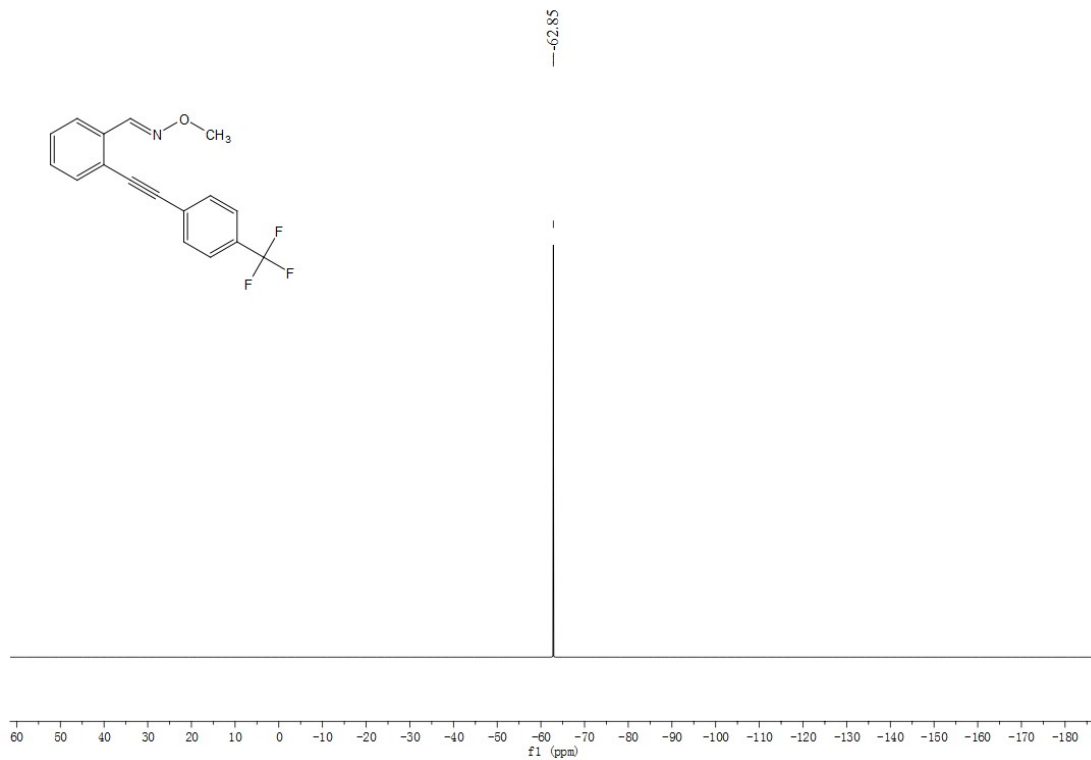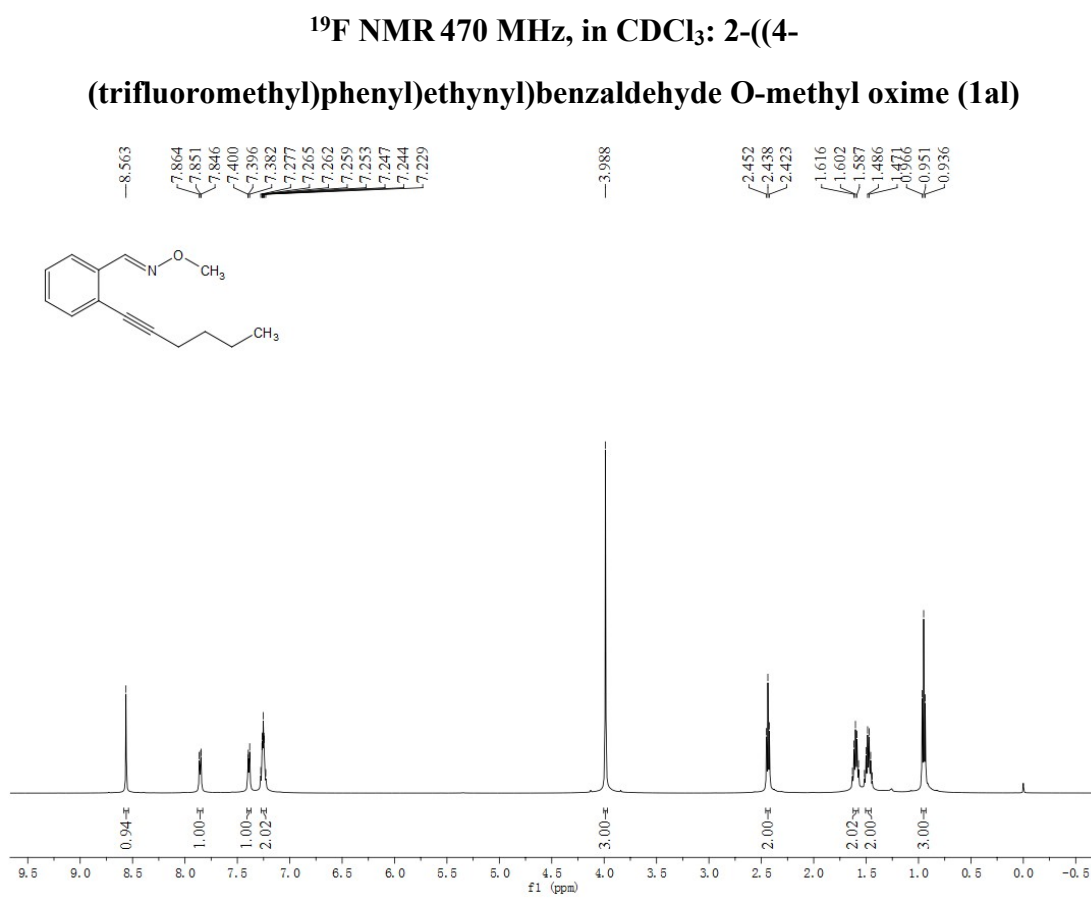

$^1\text{H}$  NMR 500 MHz, in  $\text{CDCl}_3$ : 2-(hex-1-yn-1-yl)benzaldehyde O-methyl oxime (1am)

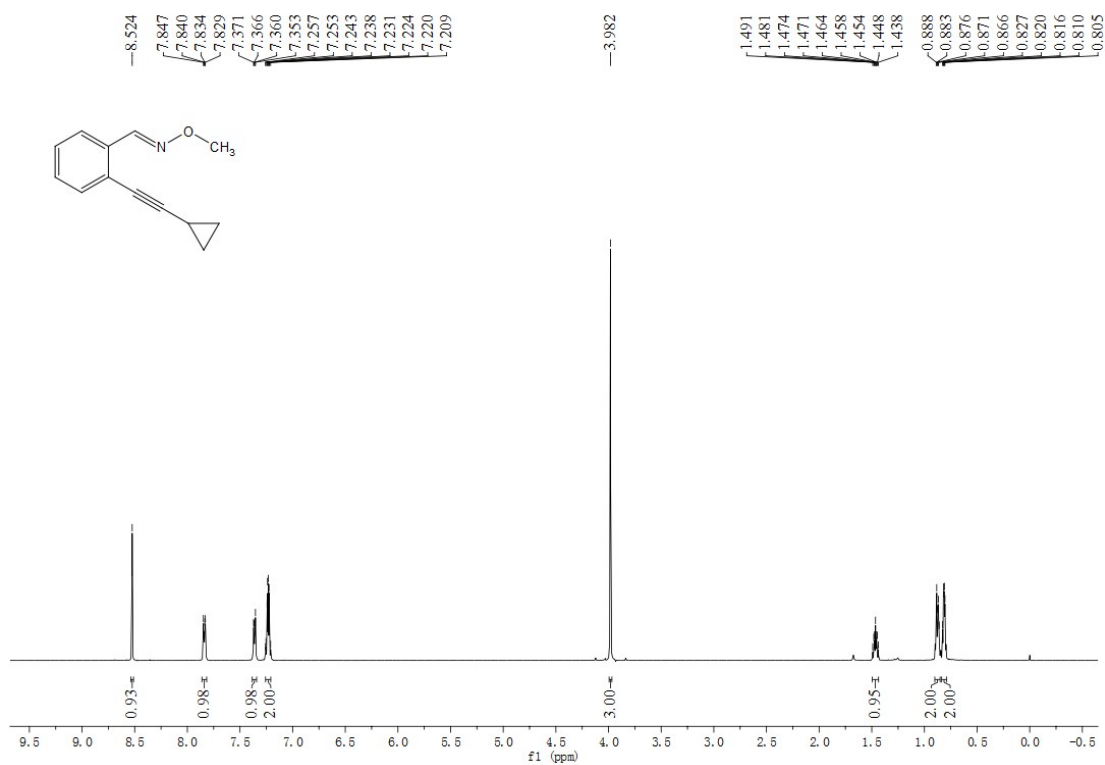

**<sup>1</sup>H NMR 500 MHz, in CDCl<sub>3</sub>: 2-(cyclopropylethynyl)benzaldehyde O-methyl oxime (1an)**

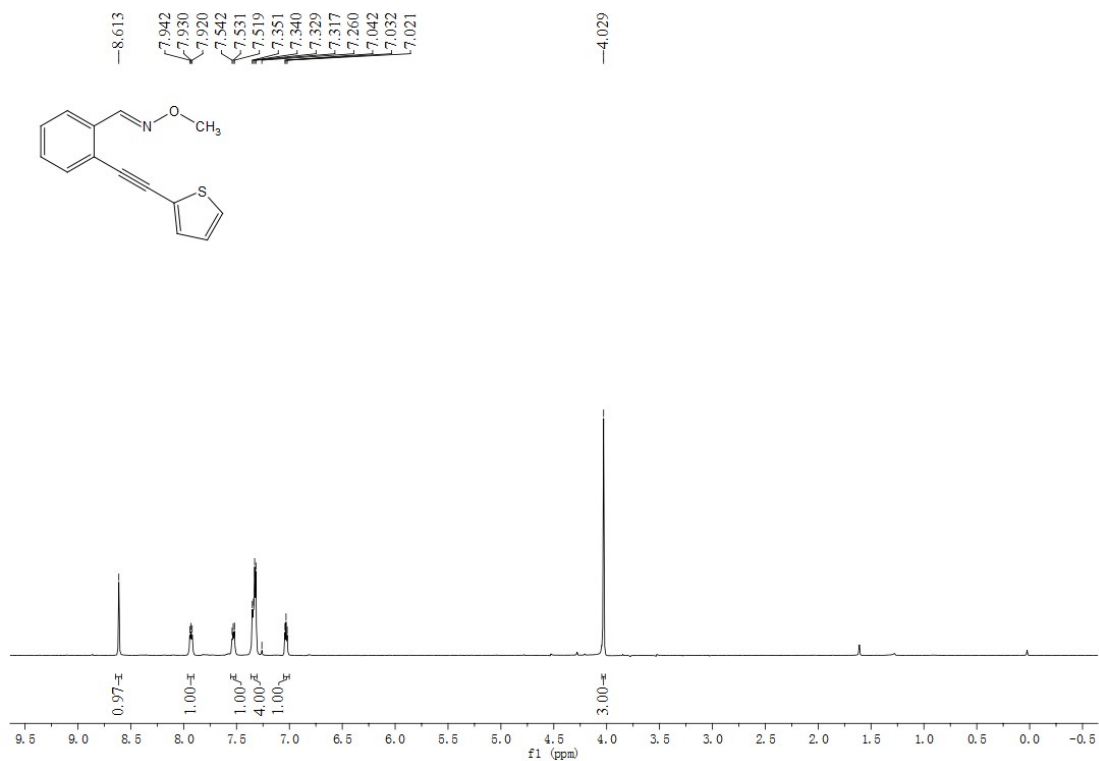

**<sup>1</sup>H NMR 400 MHz, in CDCl<sub>3</sub>: 2-(thiophen-2-ylethynyl)benzaldehyde O-methyl oxime (1ao)**



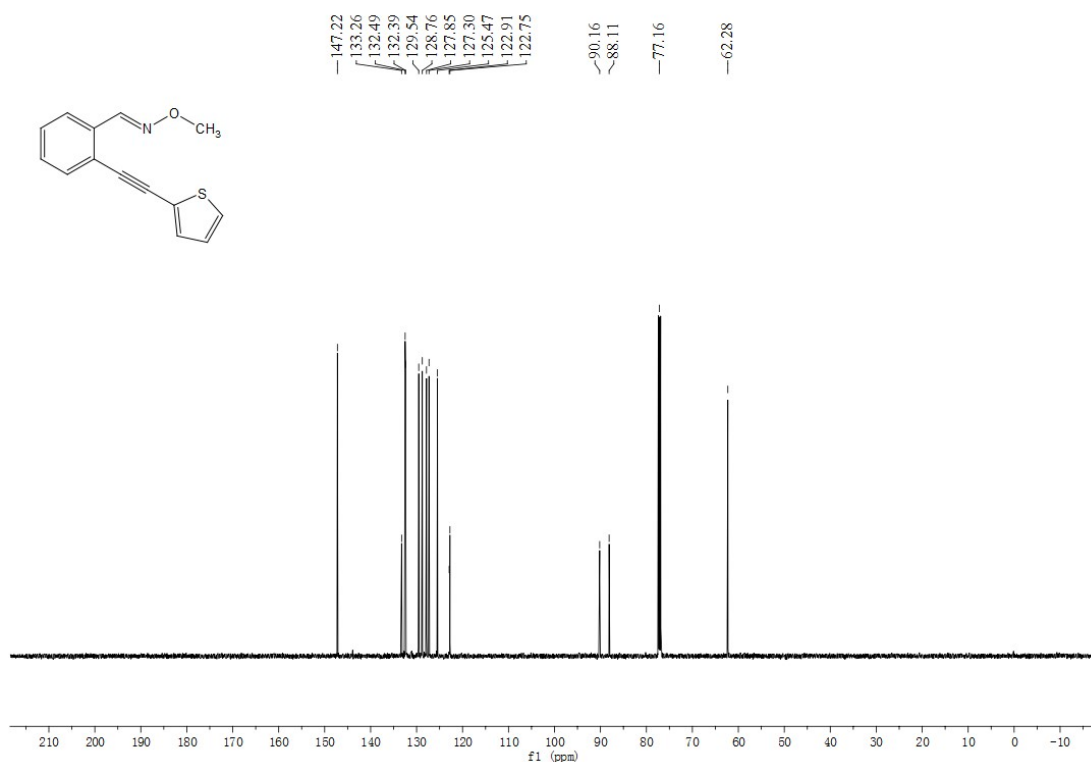

$^{13}\text{C}\{^1\text{H}\}$  NMR 125 MHz, in  $\text{CDCl}_3$ : 2-(thiophen-2-ylethynyl)benzaldehyde O-methyl oxime (1ao)

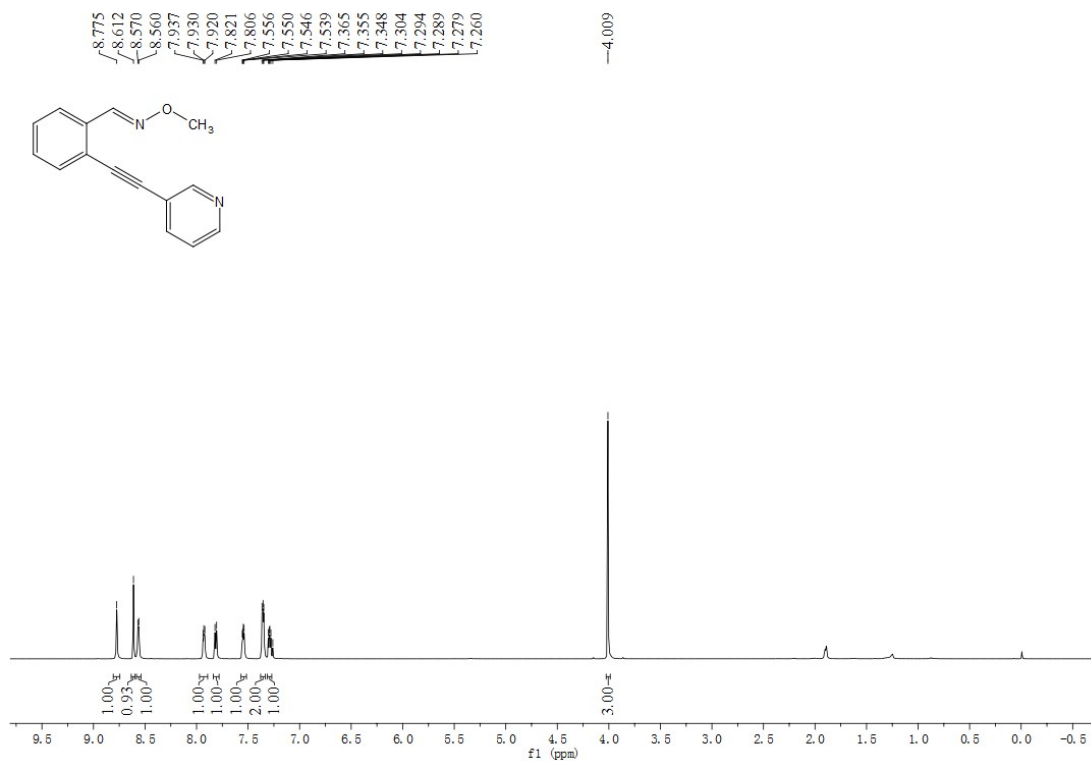

$^1\text{H}$  NMR 500 MHz, in  $\text{CDCl}_3$ : 2-(pyridin-3-ylethynyl)benzaldehyde O-methyl oxime (1ap)

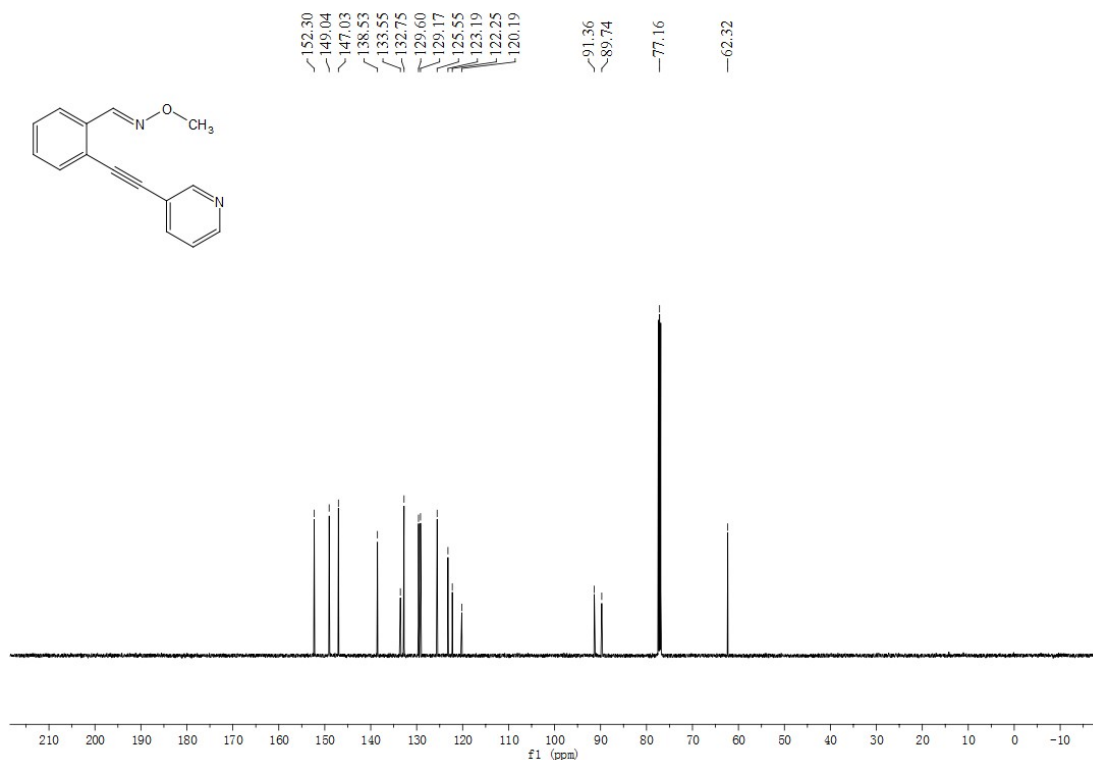

$^{13}\text{C}\{^1\text{H}\}$  NMR 125 MHz, in  $\text{CDCl}_3$ : 2-(pyridin-3-ylethynyl)benzaldehyde O-methyl oxime (1ap)

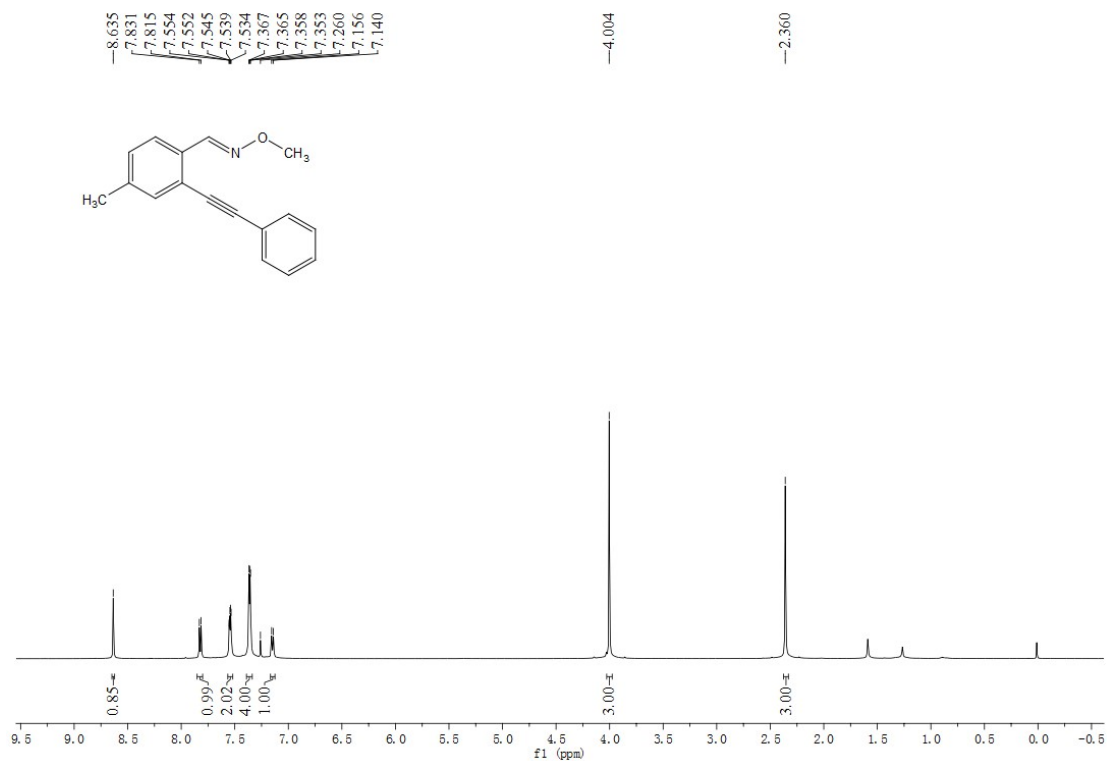

$^1\text{H}$  NMR 500 MHz, in  $\text{CDCl}_3$ : 4-methyl-2-(phenylethynyl)benzaldehyde O-methyl oxime (1aq)

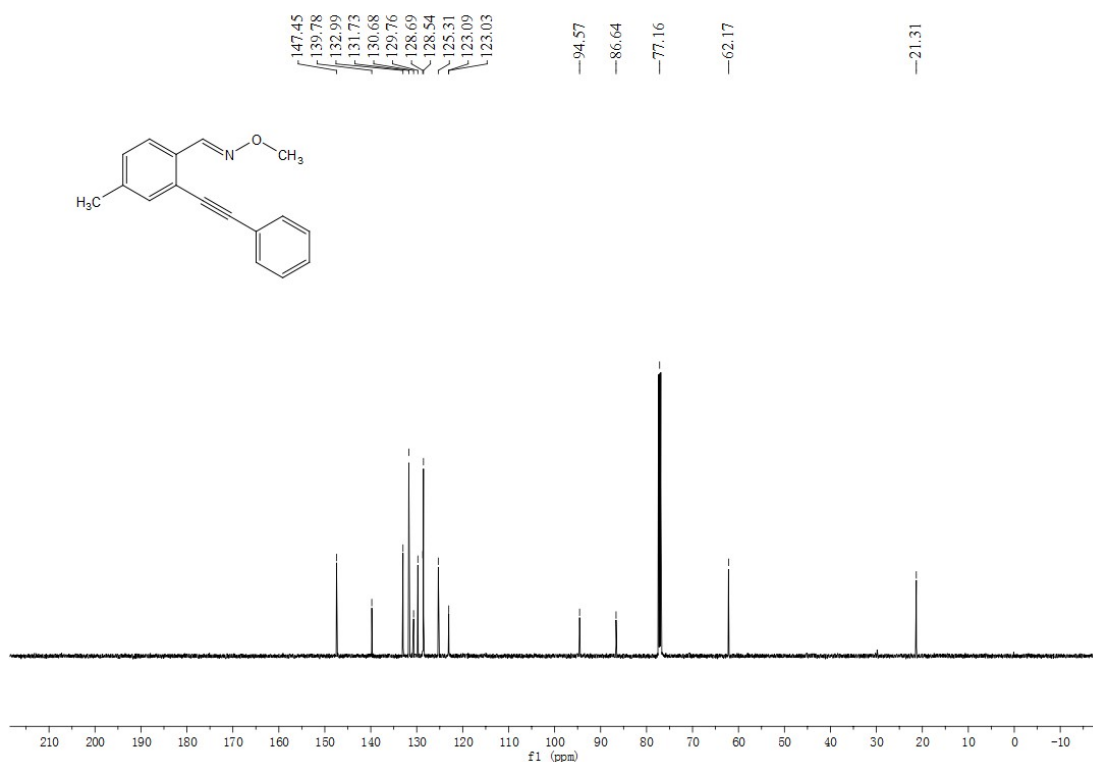

$^{13}\text{C}\{^1\text{H}\}$  NMR 125 MHz, in  $\text{CDCl}_3$ : 4-methyl-2-(phenylethynyl)benzaldehyde O-methyl oxime (1aq)

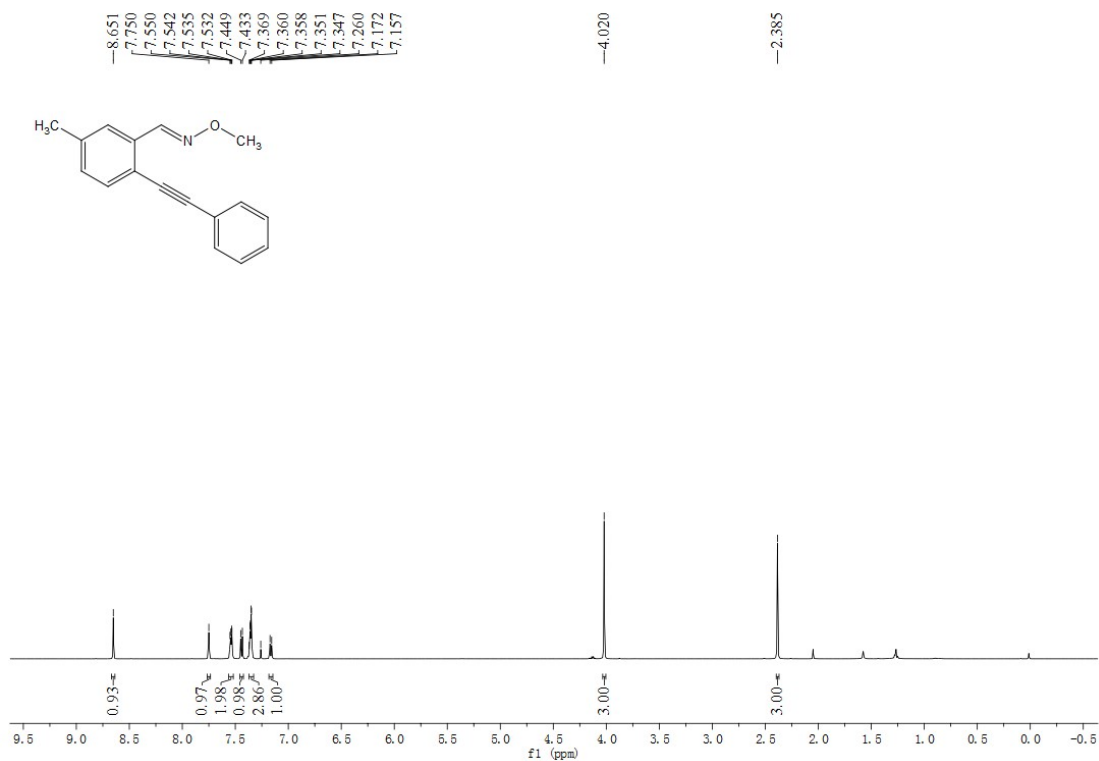

$^1\text{H}$  NMR 500 MHz, in  $\text{CDCl}_3$ : 5-methyl-2-(phenylethynyl)benzaldehyde O-methyl oxime (1ar)

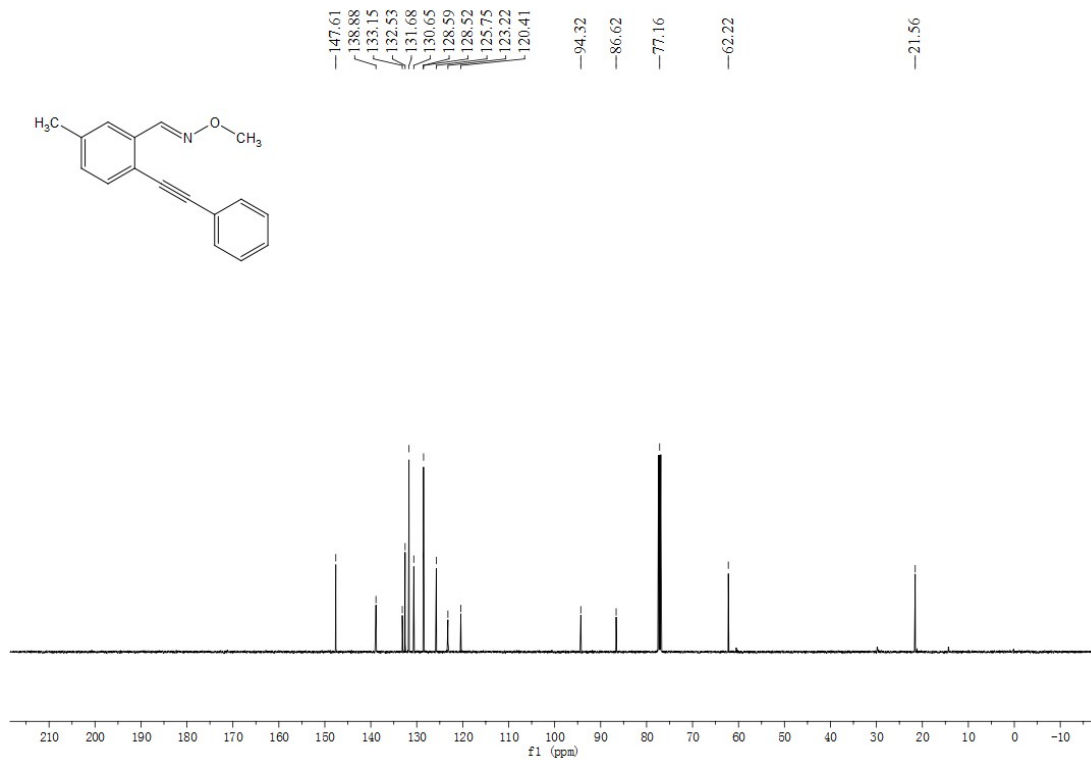

$^{13}\text{C}\{^1\text{H}\}$  NMR 125 MHz, in  $\text{CDCl}_3$ : 5-methyl-2-(phenylethynyl)benzaldehyde O-methyl oxime (1ar)

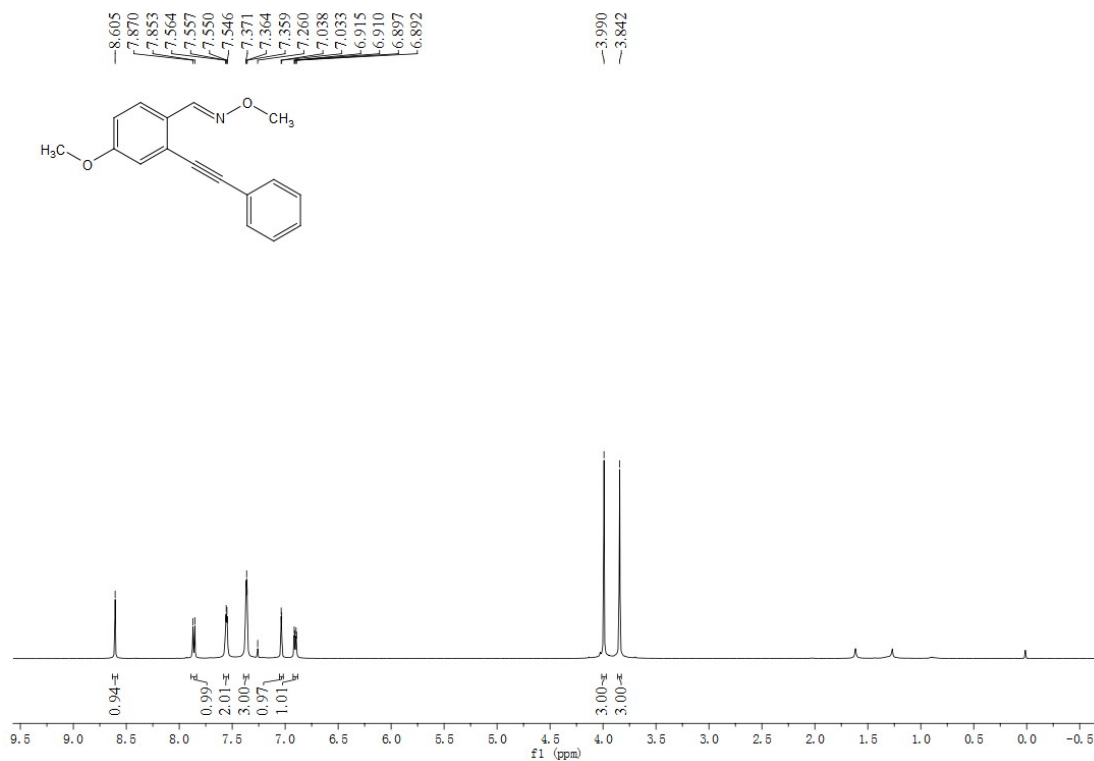

$^1\text{H}$  NMR 500 MHz, in  $\text{CDCl}_3$ : 4-methoxy-2-(phenylethynyl)benzaldehyde O-methyl oxime (1as)

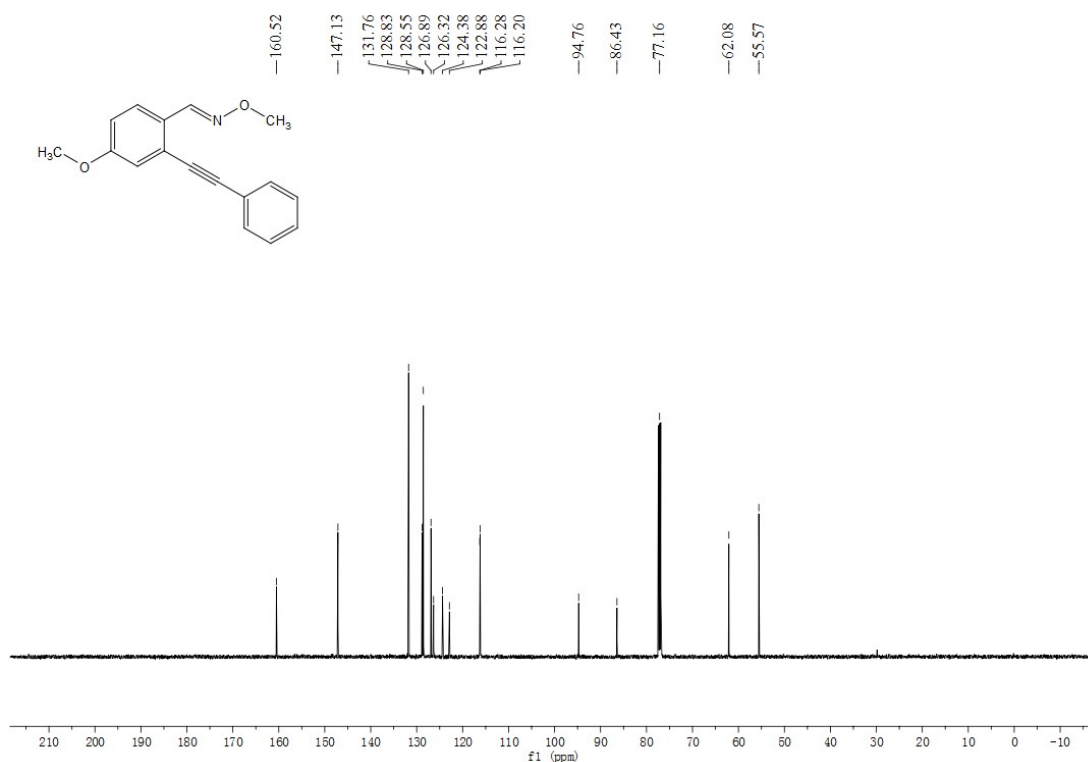

$^{13}\text{C}\{^1\text{H}\}$  NMR 125 MHz, in  $\text{CDCl}_3$ : 4-methoxy-2-(phenylethynyl)benzaldehyde O-methyl oxime (1as)

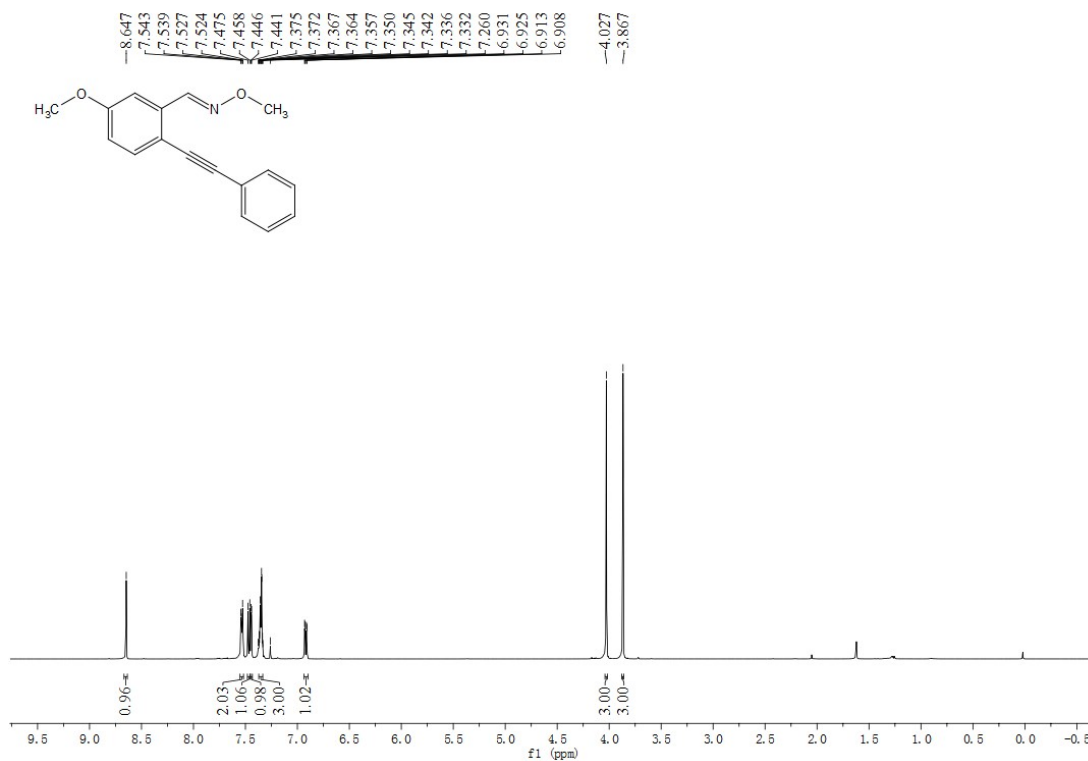

$^1\text{H}$  NMR 500 MHz, in  $\text{CDCl}_3$ : 5-methoxy-2-(phenylethynyl)benzaldehyde O-methyl oxime (1at)

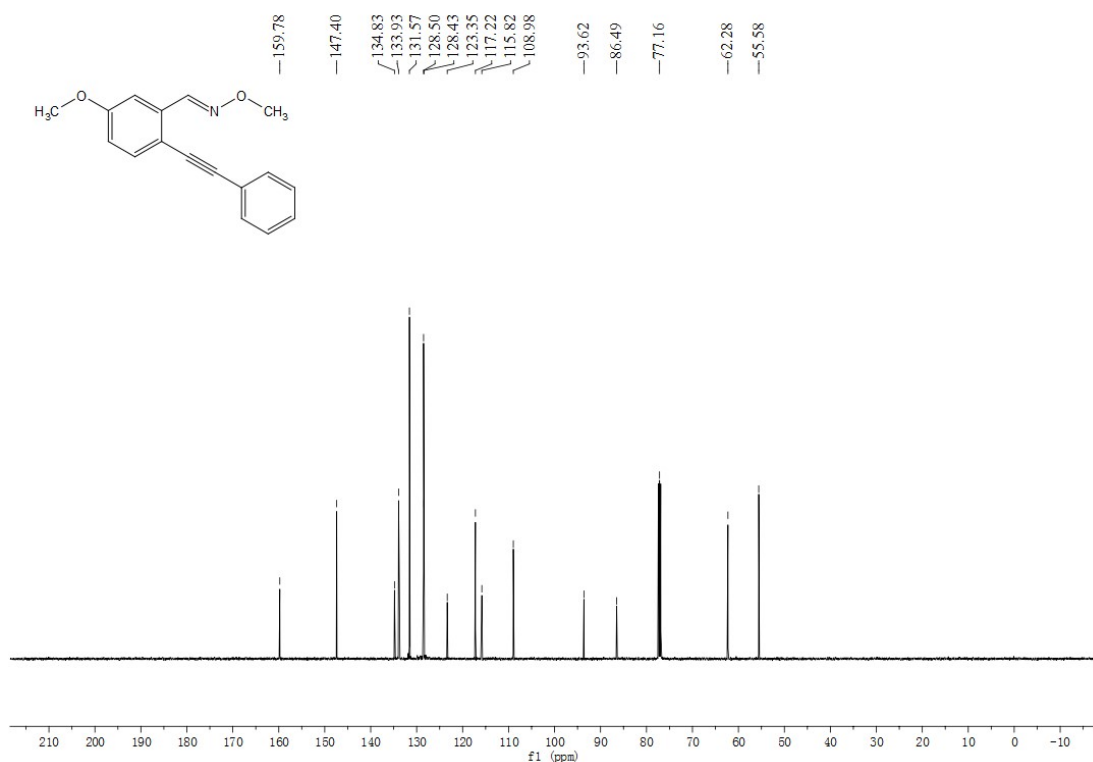

$^{13}\text{C}\{^1\text{H}\}$  NMR 125 MHz, in  $\text{CDCl}_3$ : 5-methoxy-2-(phenylethynyl)benzaldehyde  
O-methyl oxime (1at)

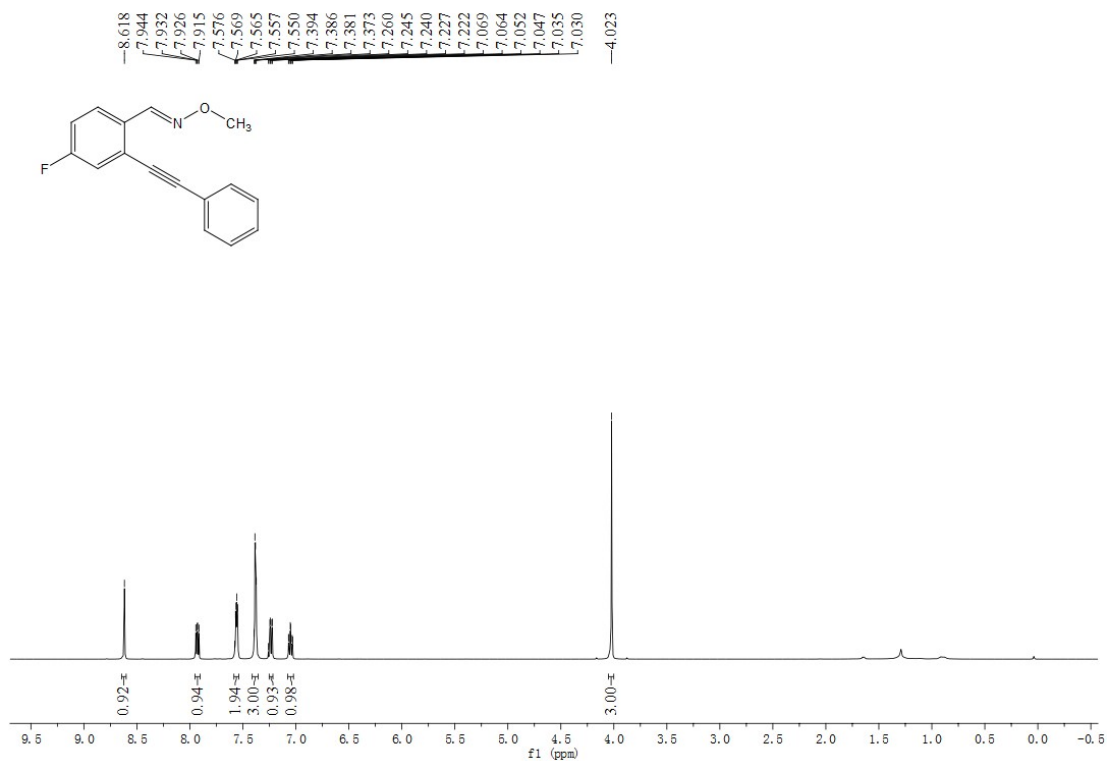

$^1\text{H}$  NMR 500 MHz, in  $\text{CDCl}_3$ : 4-fluoro-2-(phenylethynyl)benzaldehyde O-methyl  
oxime (1au)

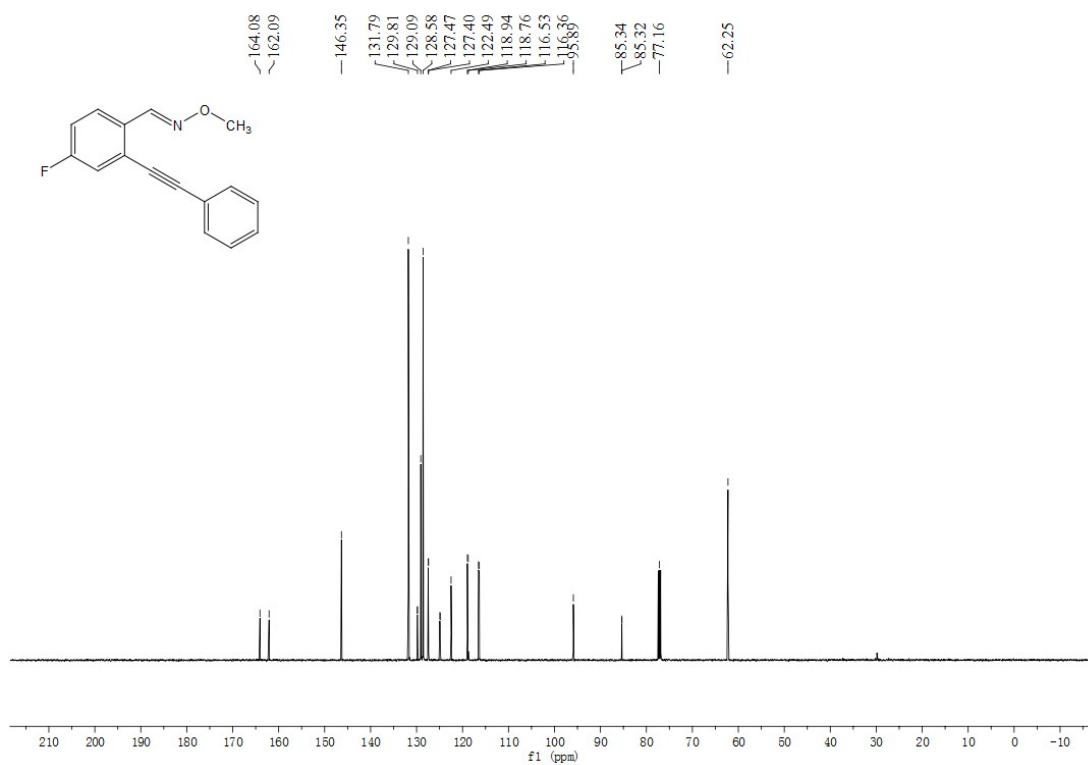

$^{13}\text{C}\{^1\text{H}\}$  NMR 125 MHz, in  $\text{CDCl}_3$ : 4-fluoro-2-(phenylethynyl)benzaldehyde O-methyl oxime (1au)

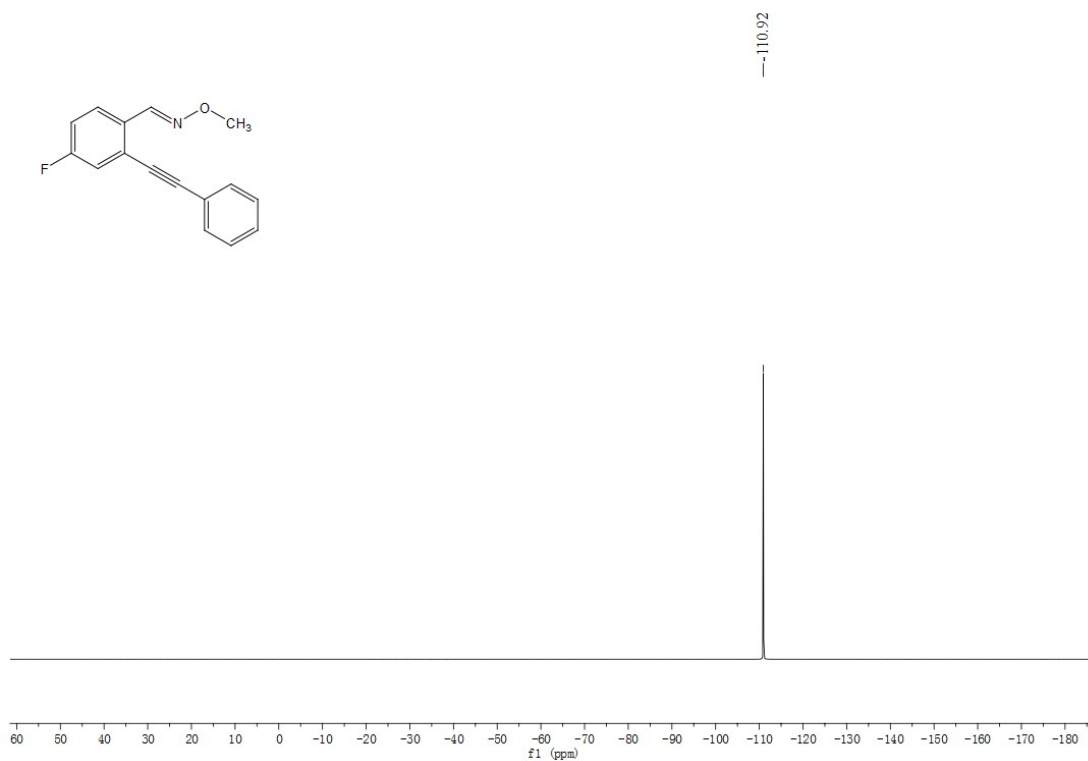

$^{19}\text{F}$  NMR 470 MHz, in  $\text{CDCl}_3$ : 4-fluoro-2-(phenylethynyl)benzaldehyde O-methyl oxime (1au)

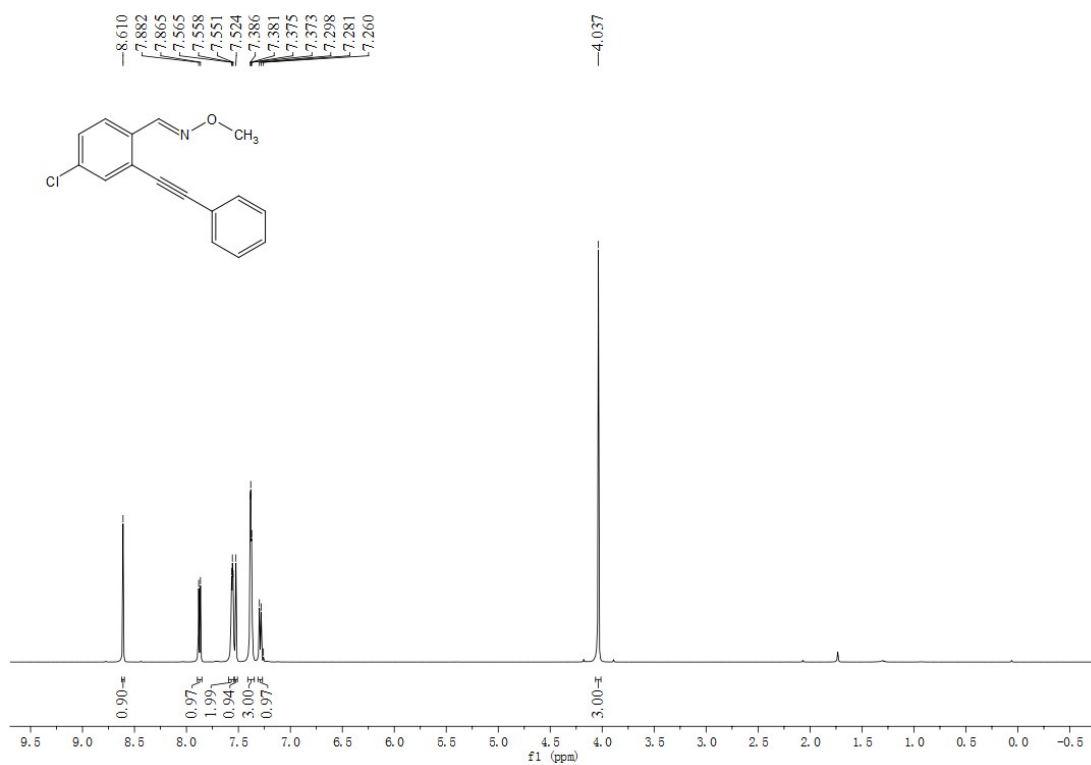

**<sup>1</sup>H NMR 500 MHz, in CDCl<sub>3</sub>: 4-chloro-2-(phenylethynyl)benzaldehyde O-methyl oxime (1av)**

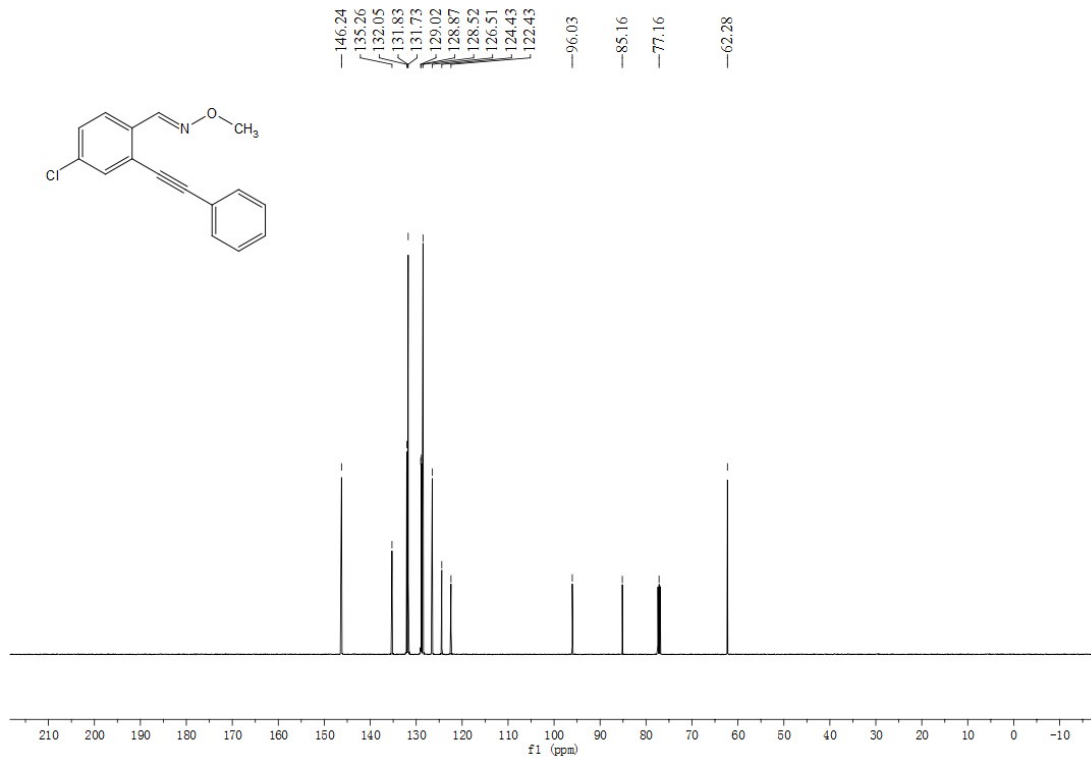

**<sup>13</sup>C{<sup>1</sup>H} NMR 125 MHz, in CDCl<sub>3</sub>: 4-chloro-2-(phenylethynyl)benzaldehyde O-methyl oxime (1av)**



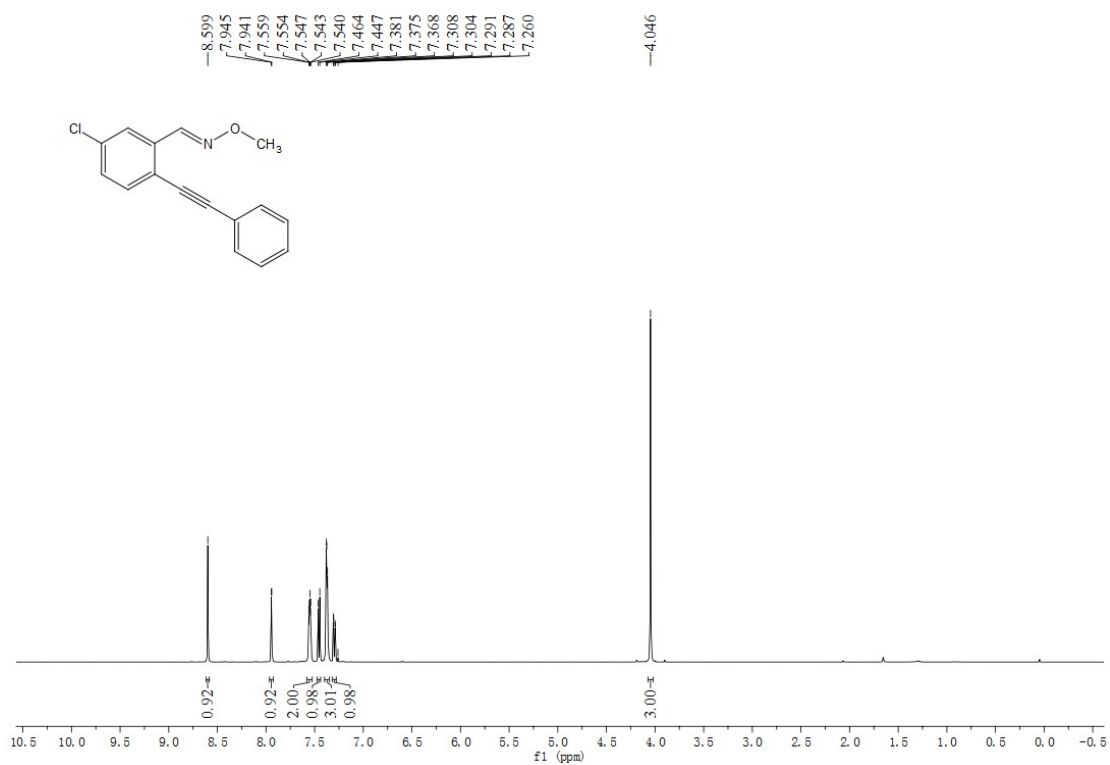

**<sup>1</sup>H NMR 500 MHz, in CDCl<sub>3</sub>: 5-chloro-2-(phenylethynyl)benzaldehyde O-methyl oxime (1aw)**

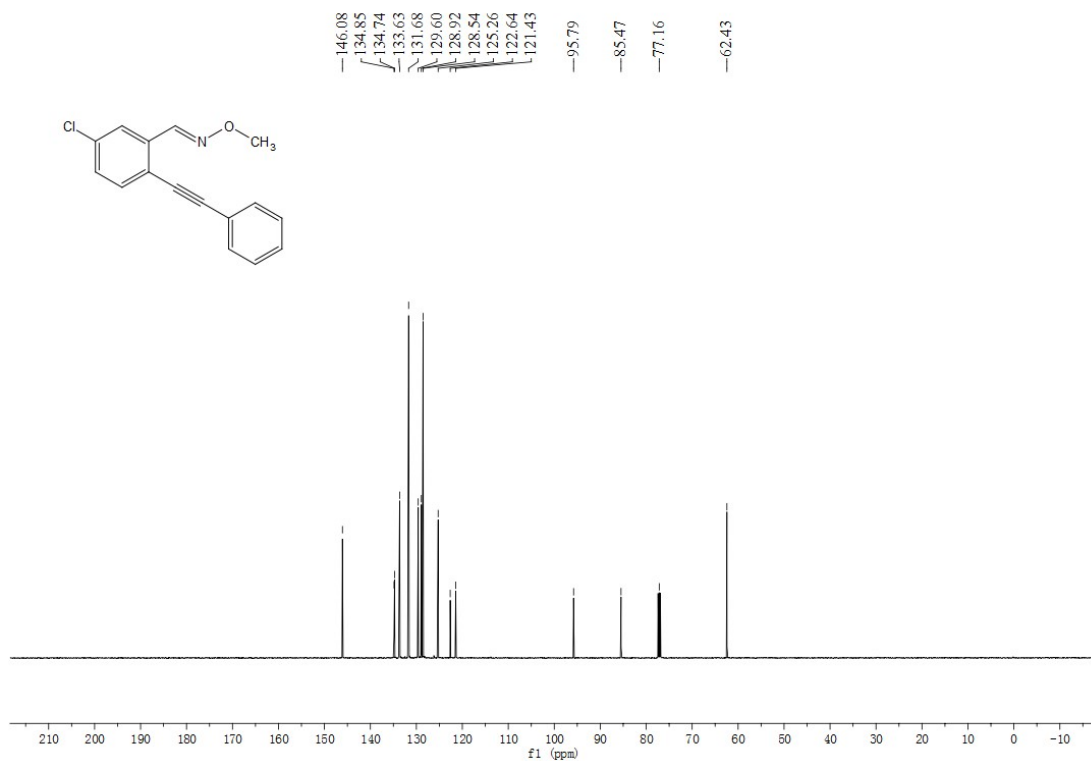

**<sup>13</sup>C{<sup>1</sup>H} NMR 125 MHz, in CDCl<sub>3</sub>: 5-chloro-2-(phenylethynyl)benzaldehyde O-methyl oxime (1aw)**

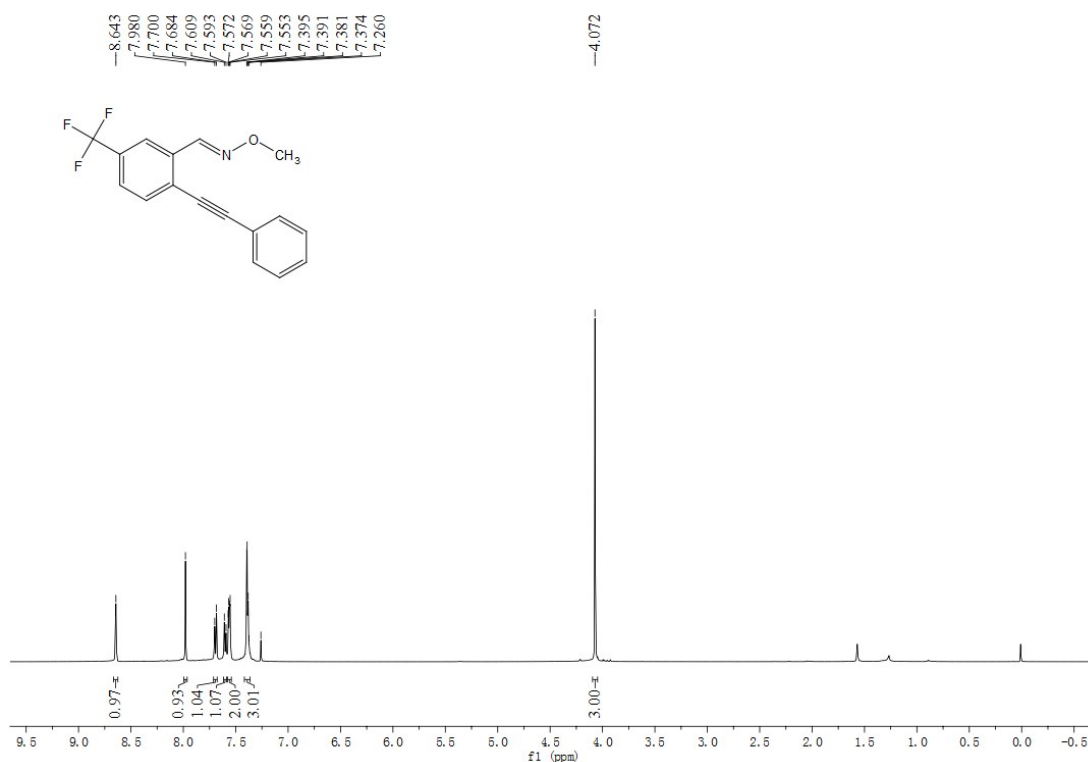

**<sup>1</sup>H NMR 500 MHz, in CDCl<sub>3</sub>: 2-(phenylethynyl)-5-(trifluoromethyl)benzaldehyde O-methyl oxime (1ax)**

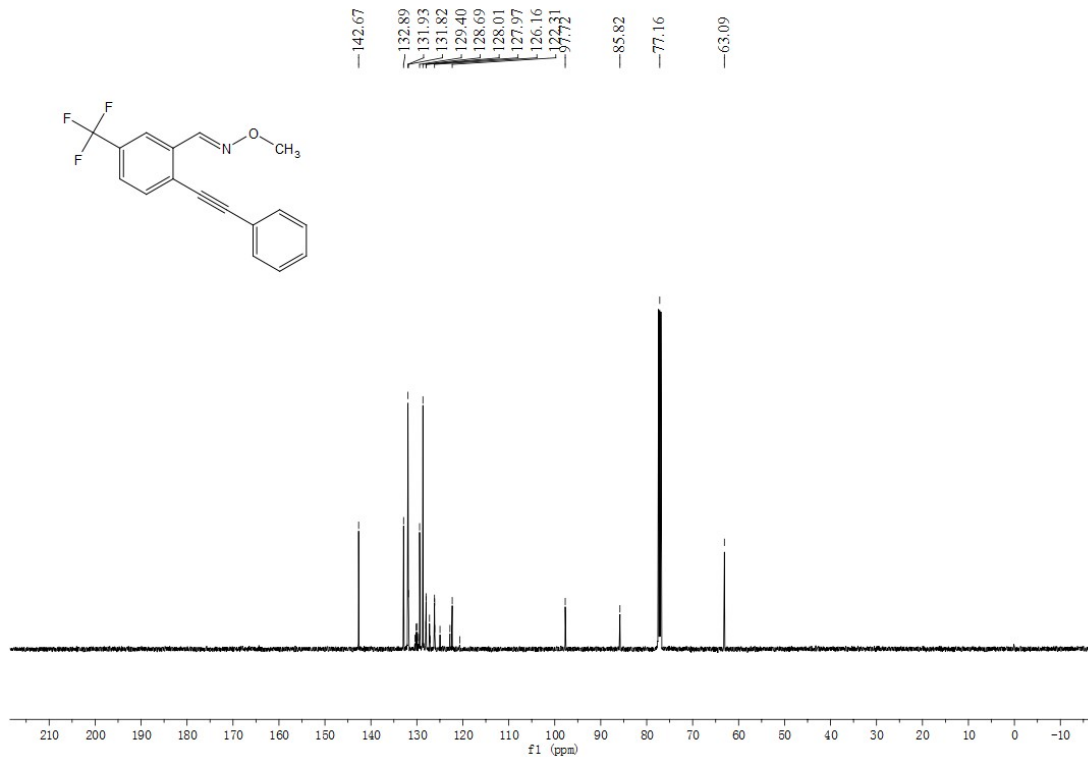

**<sup>13</sup>C{<sup>1</sup>H} NMR 125 MHz, in CDCl<sub>3</sub>: 2-(phenylethynyl)-5-(trifluoromethyl)benzaldehyde O-methyl oxime (1ax)**

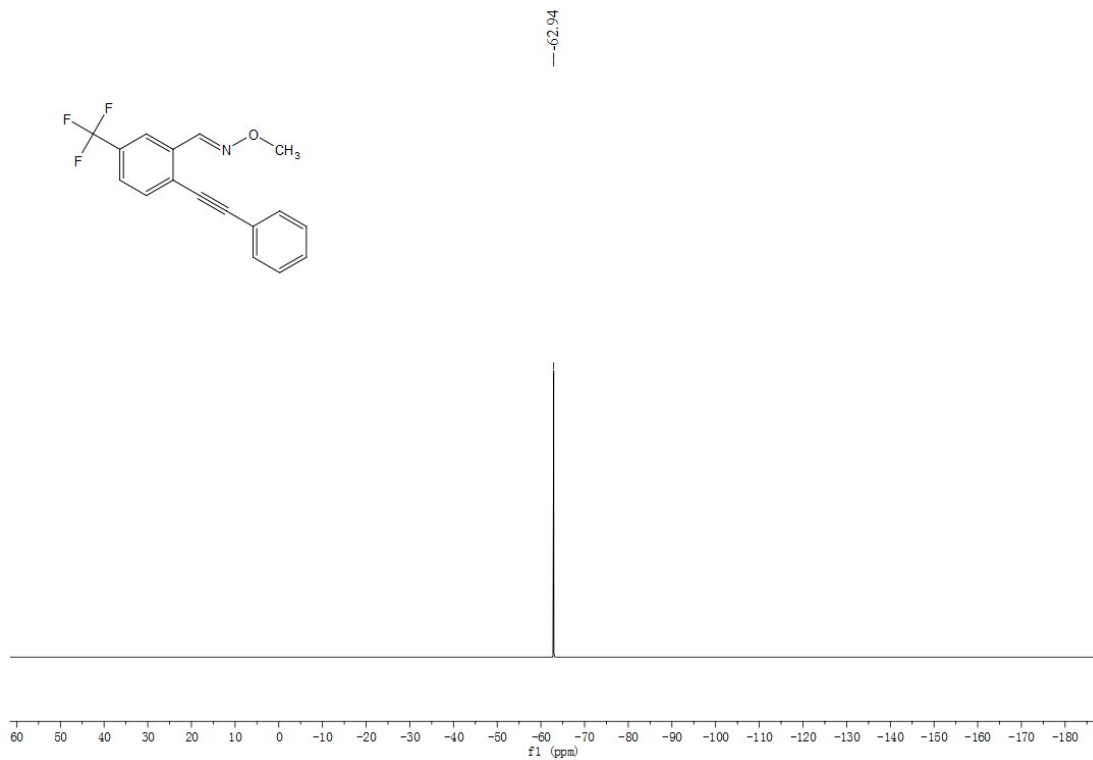

**<sup>19</sup>F NMR 470 MHz, in CDCl<sub>3</sub>: 2-(phenylethynyl)-5-(trifluoromethyl)benzaldehyde O-methyl oxime (1ax)**

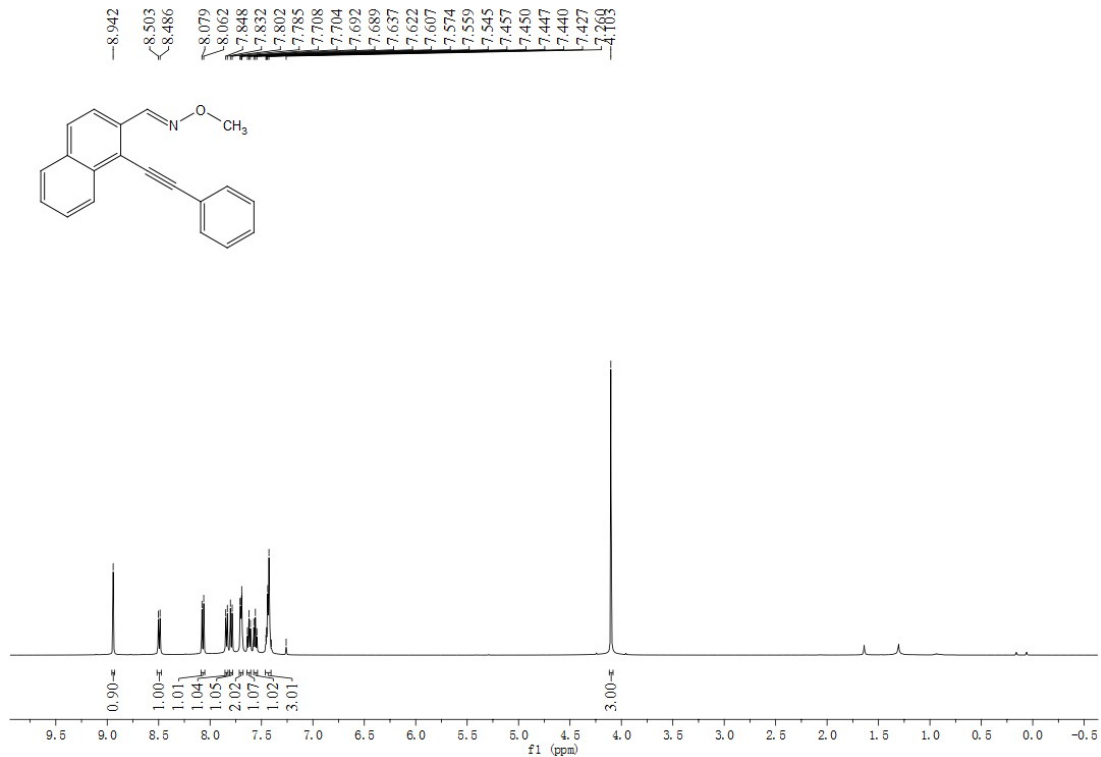

**<sup>1</sup>H NMR 500 MHz, in CDCl<sub>3</sub>: 1-(phenylethynyl)-2-naphthaldehyde O-methyl oxime (1ay)**

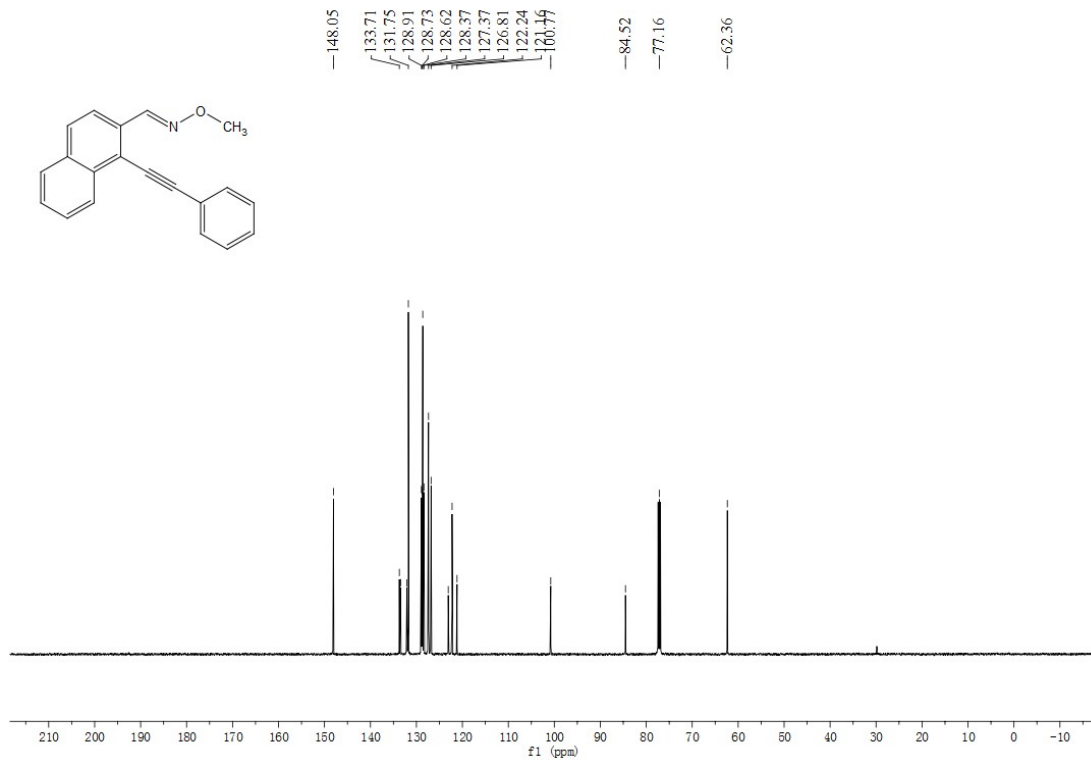

$^{13}\text{C}\{^1\text{H}\}$  NMR 125 MHz, in  $\text{CDCl}_3$ : 1-(phenylethynyl)-2-naphthaldehyde O-methyl oxime (1ay)

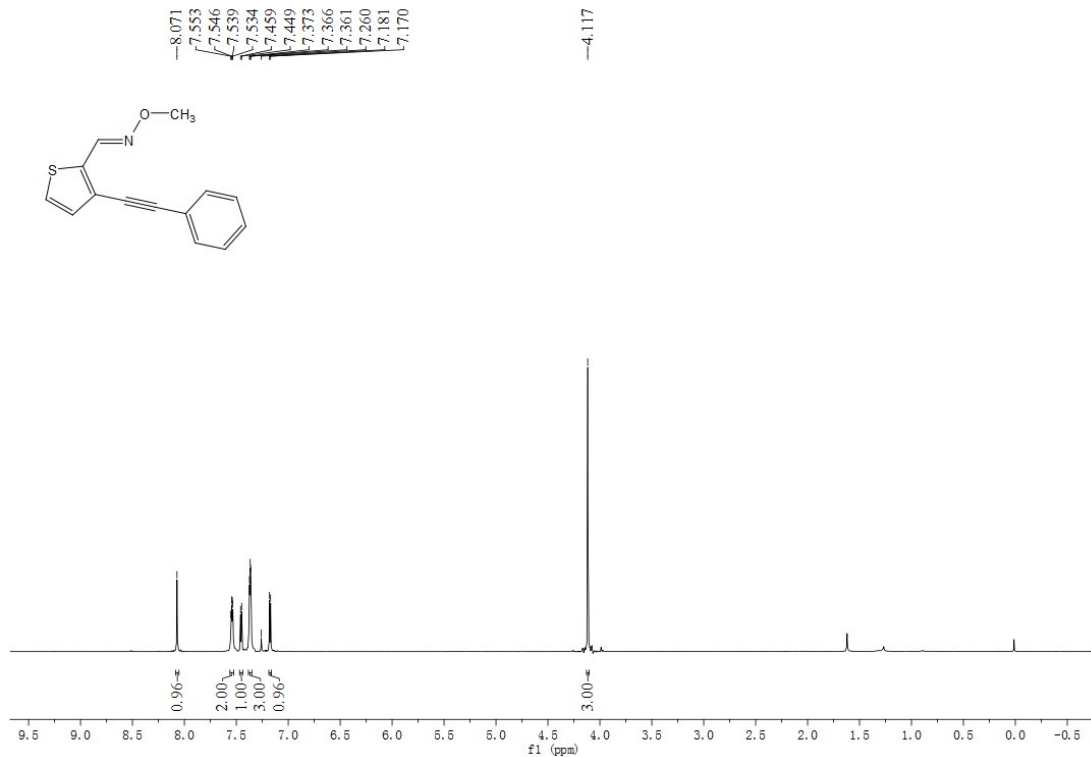

$^1\text{H}$  NMR 500 MHz, in  $\text{CDCl}_3$ : 3-(phenylethynyl)thiophene-2-carbaldehyde O-methyl oxime (1az)

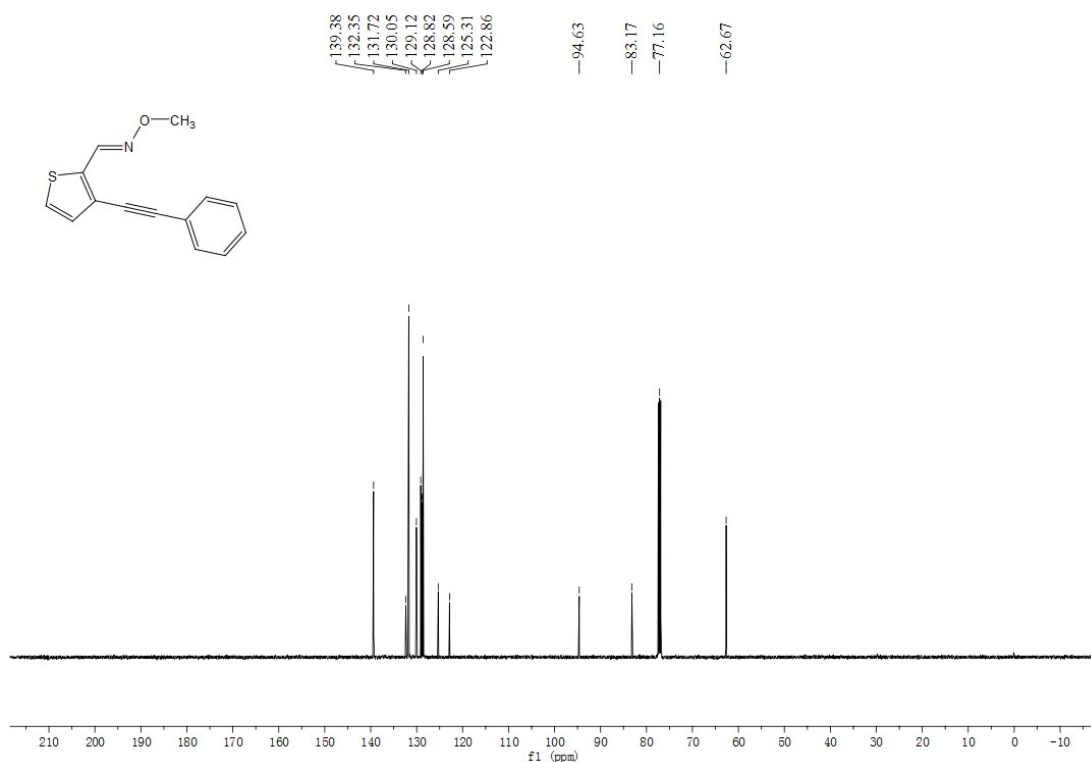

$^{13}\text{C}\{^1\text{H}\}$  NMR 125 MHz, in  $\text{CDCl}_3$ : 3-(phenylethynyl)thiophene-2-carbaldehyde O-methyl oxime (1az)

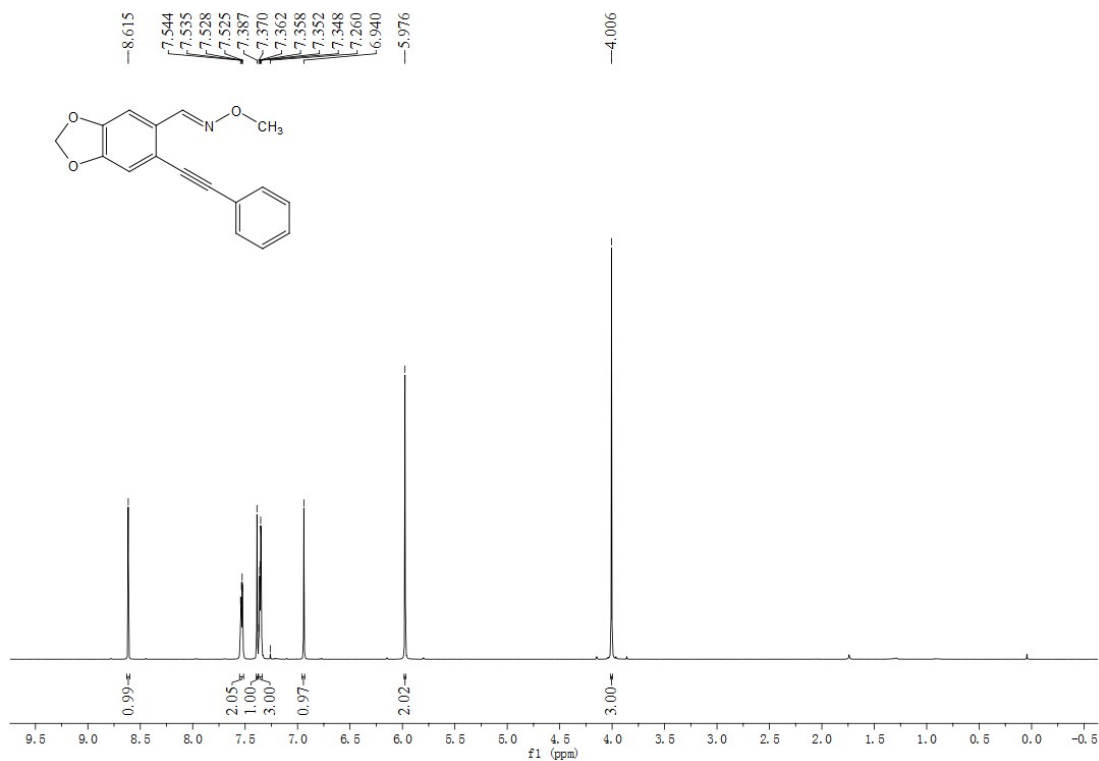

$^1\text{H}$  NMR 500 MHz, in  $\text{CDCl}_3$ : 6-(phenylethynyl)benzo[*d*][1,3]dioxole-5-carbaldehyde O-methyl oxime (1ba)

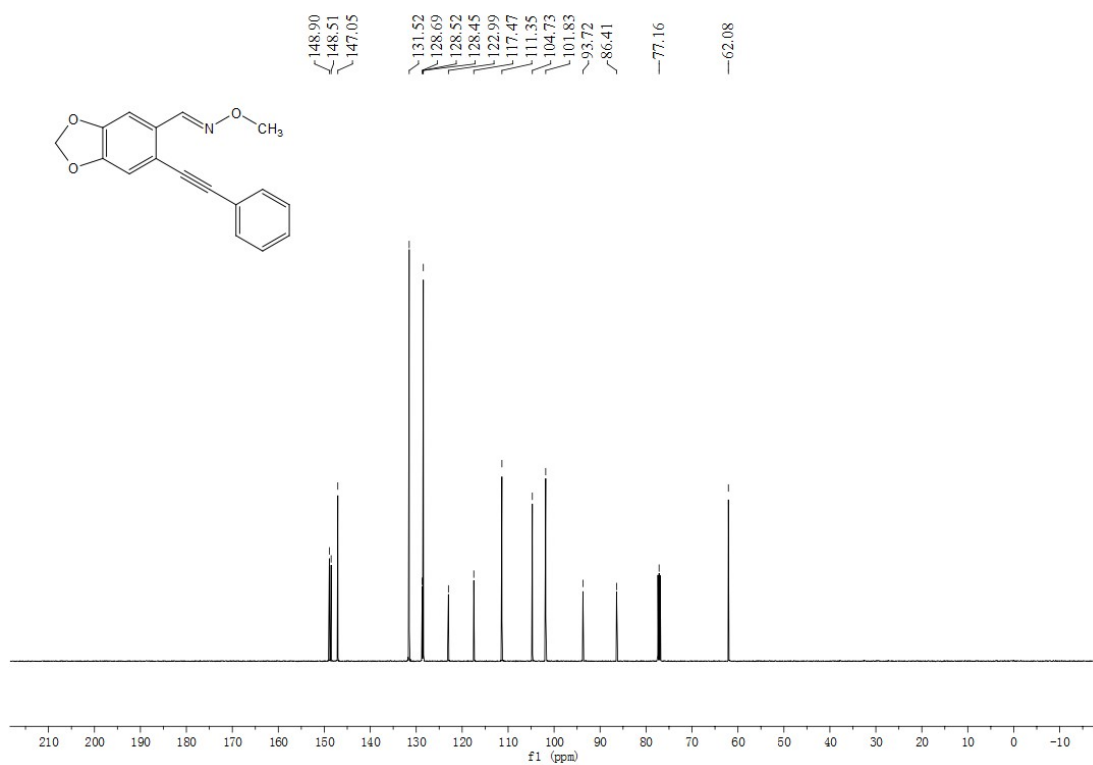

$^{13}\text{C}\{^1\text{H}\}$  NMR 125 MHz, in  $\text{CDCl}_3$ : 6-(phenylethynyl)benzo[d][1,3]dioxole-5-carbaldehyde O-methyl oxime (1ba)

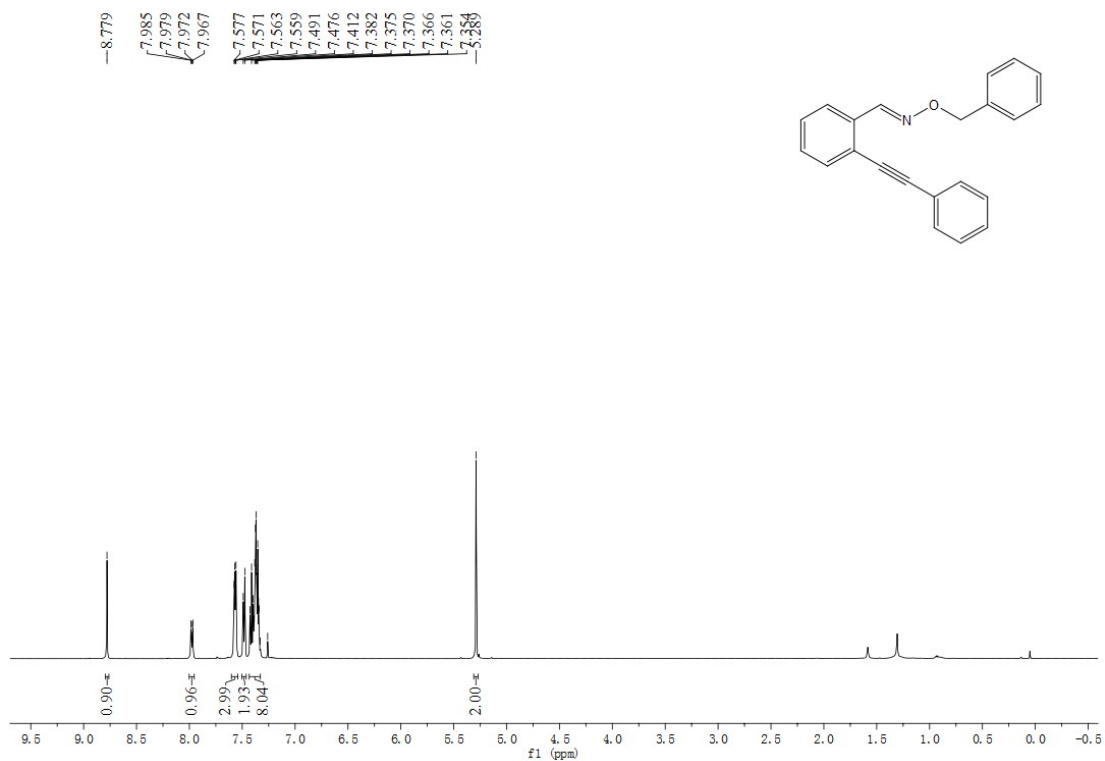

$^1\text{H}$  NMR 500 MHz, in  $\text{CDCl}_3$ : 2-(phenylethynyl)benzaldehyde O-benzyl oxime (1bb)

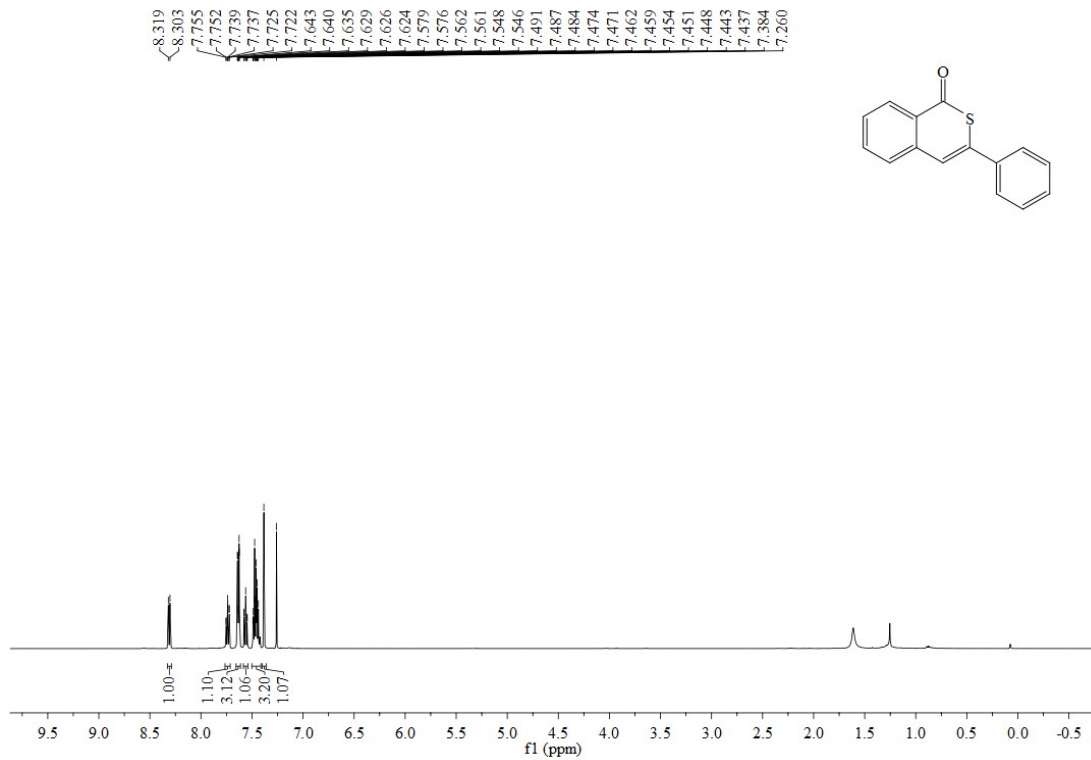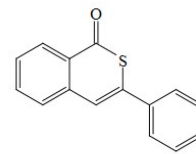

**<sup>1</sup>H NMR 500 MHz, in CDCl<sub>3</sub>: 3-phenyl-1*H*-isothiochromen-1-one (2)**

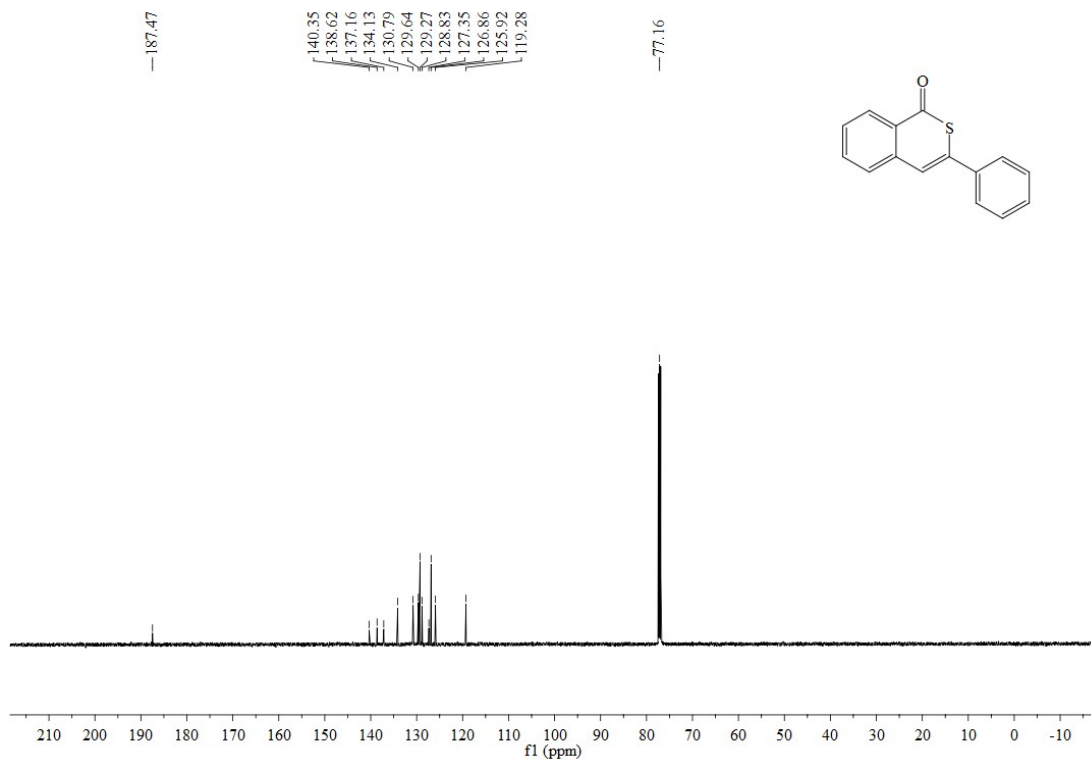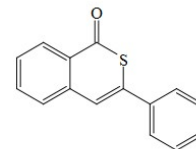

**<sup>13</sup>C{<sup>1</sup>H} NMR 125 MHz, in CDCl<sub>3</sub>: 3-phenyl-1*H*-isothiochromen-1-one (2)**

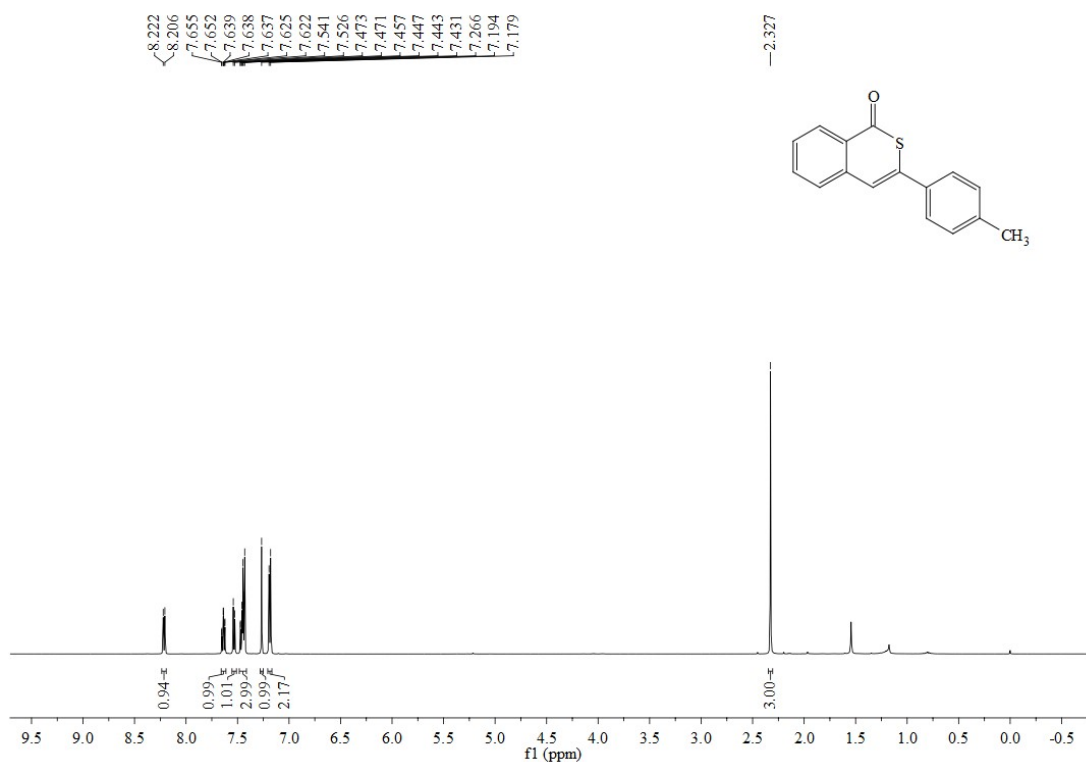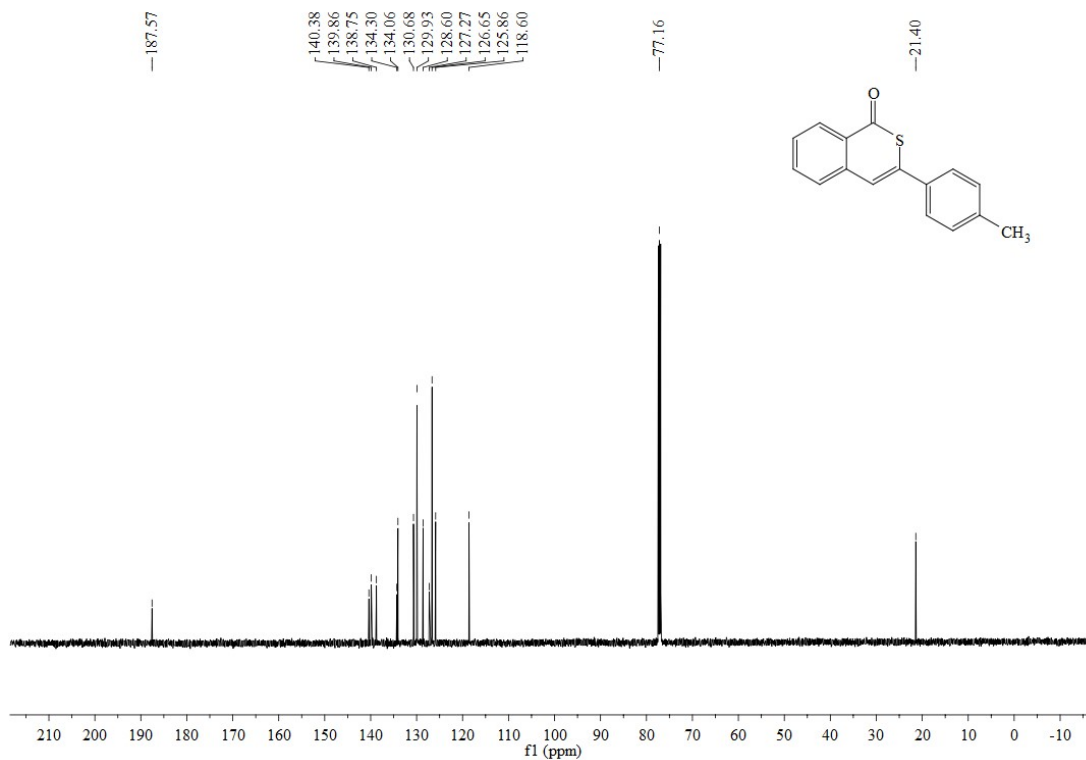



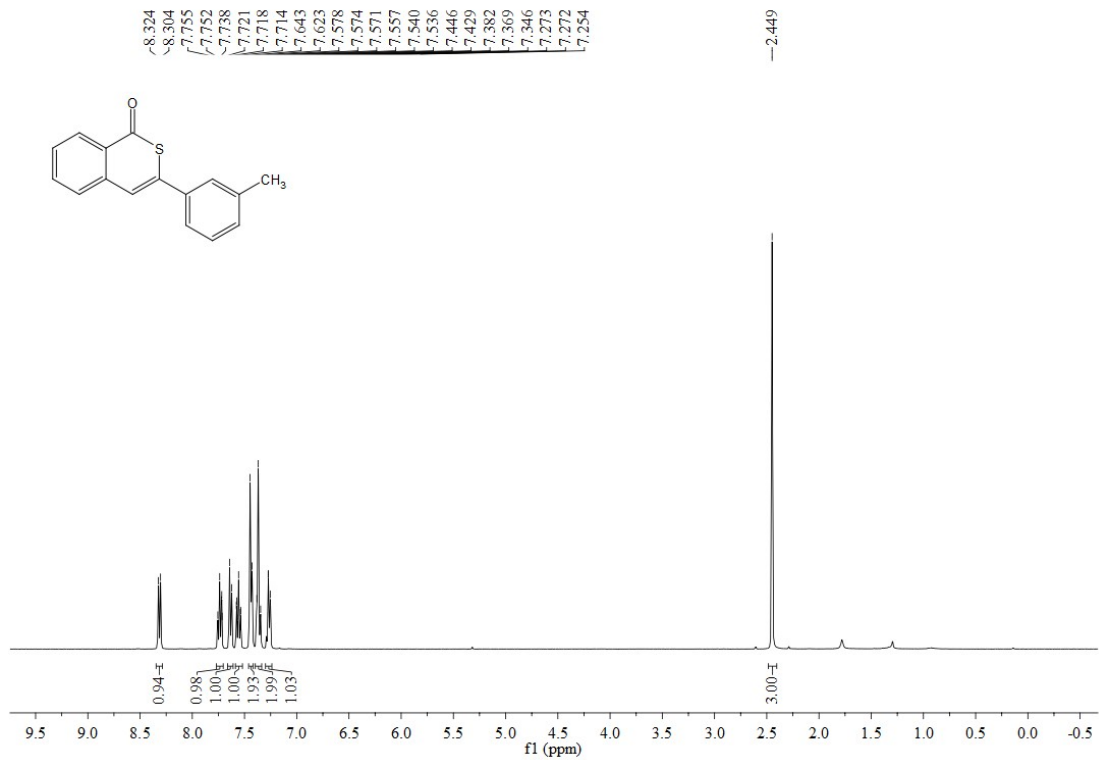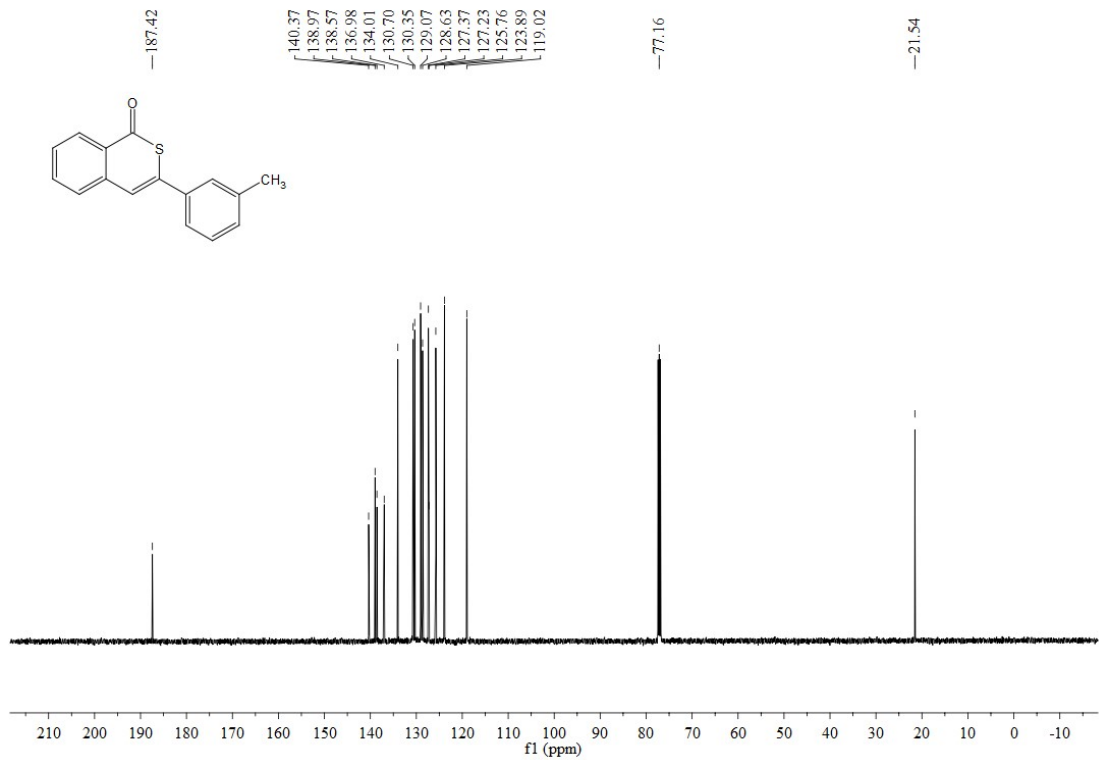

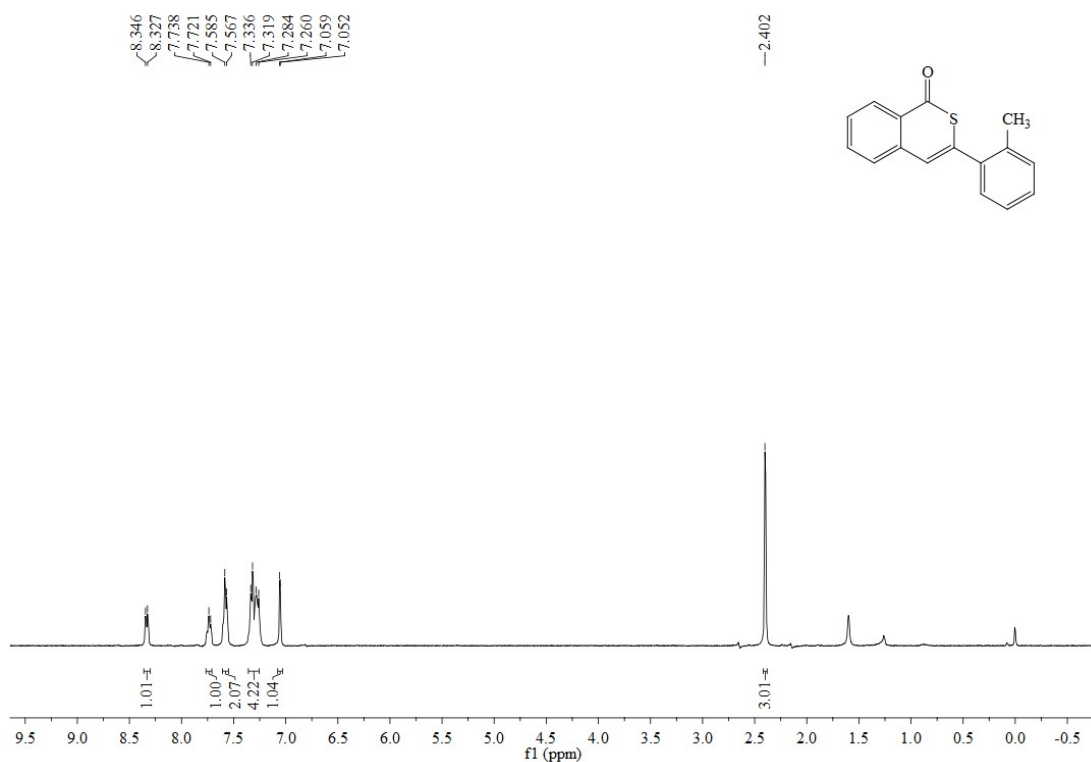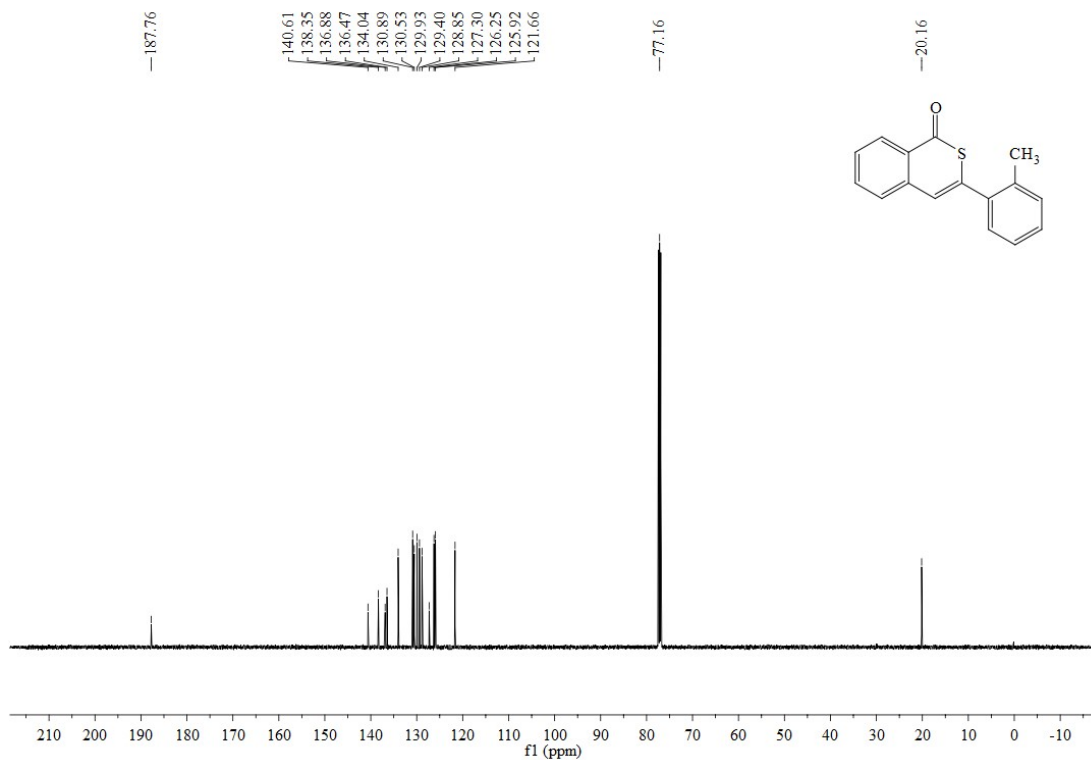

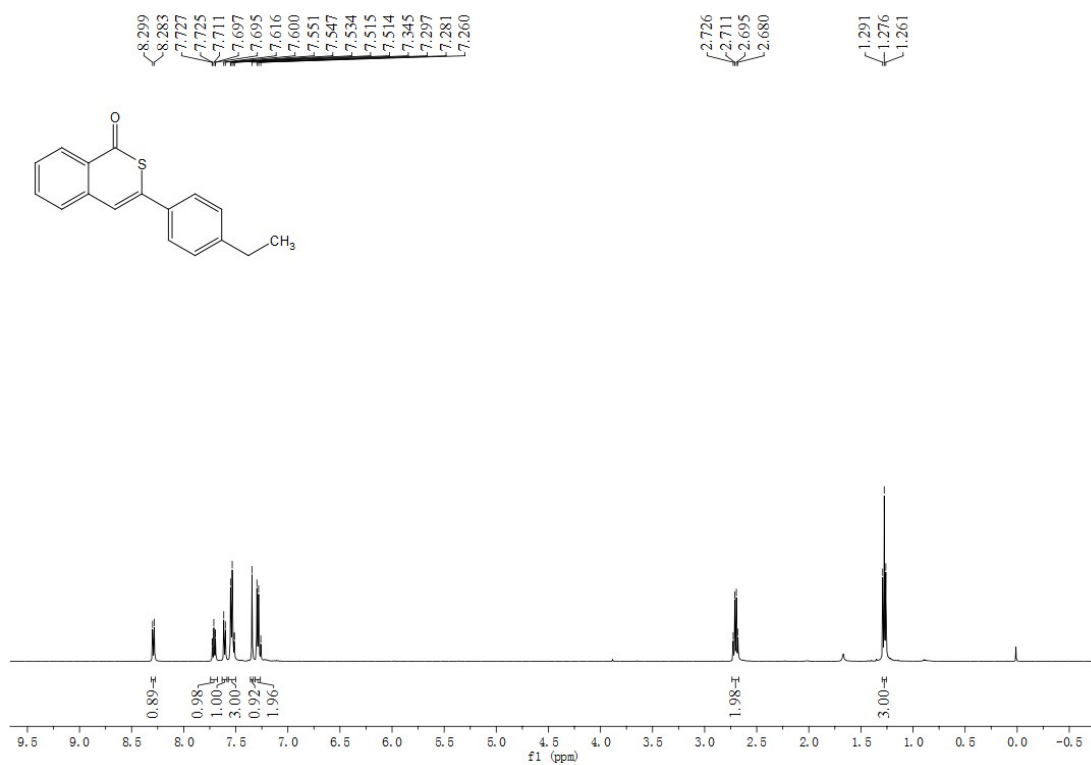

**<sup>1</sup>H NMR 500 MHz, in CDCl<sub>3</sub>: 3-(4-ethylphenyl)-1*H*-isothiochromen-1-one (6)**

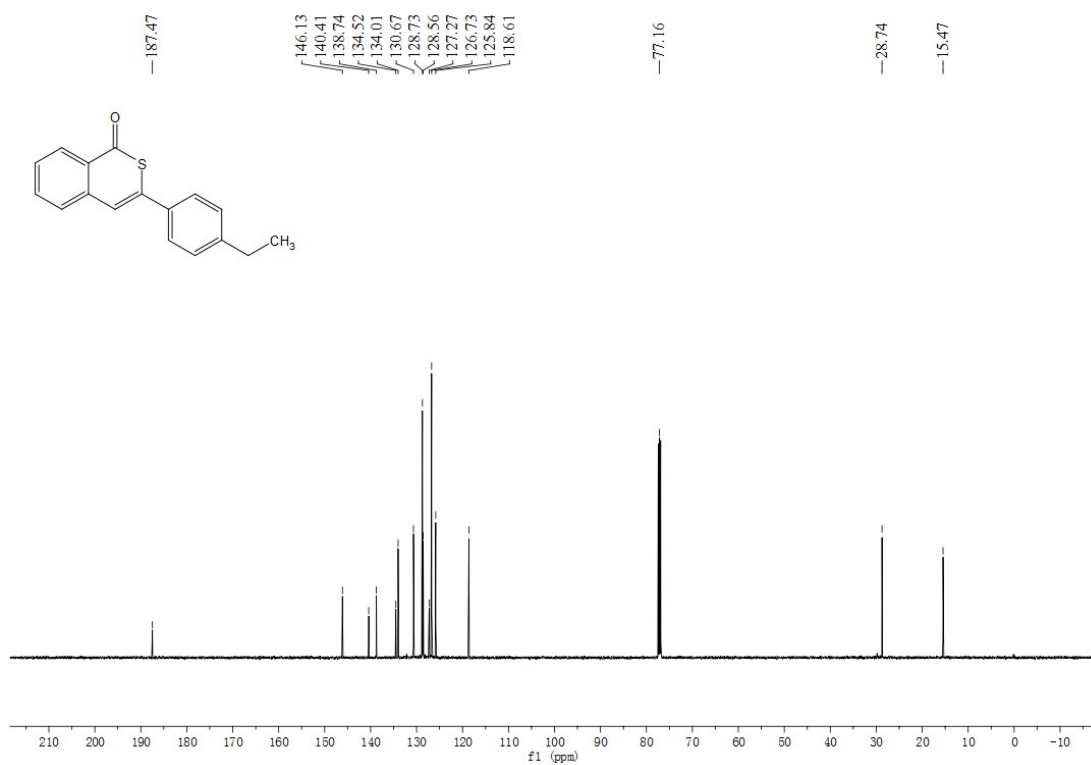

**<sup>13</sup>C{<sup>1</sup>H} NMR 125 MHz, in CDCl<sub>3</sub>: 3-(4-ethylphenyl)-1*H*-isothiochromen-1-one**

(6)

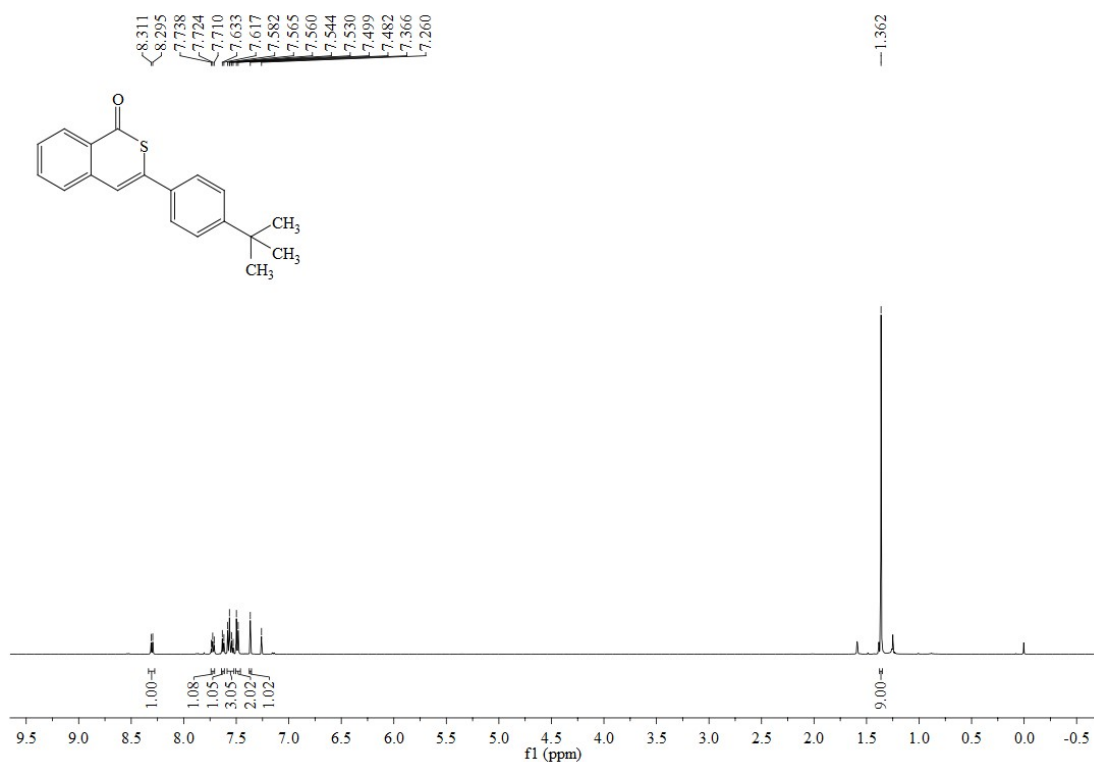

**<sup>1</sup>H NMR 500 MHz, in CDCl<sub>3</sub>: 3-(4-(tert-butyl)phenyl)-1H-isothiochromen-1-one**

(7)

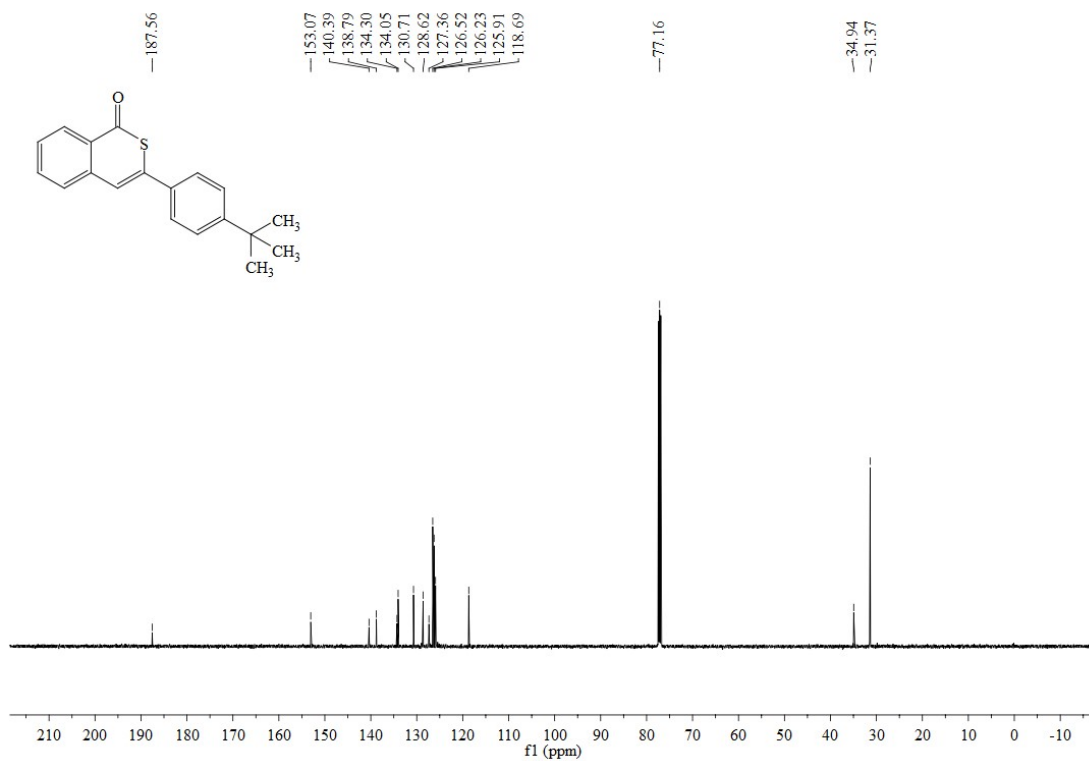

**<sup>13</sup>C{<sup>1</sup>H} NMR 125 MHz, in CDCl<sub>3</sub>: 3-(4-(tert-butyl)phenyl)-1H-isothiochromen-1-one (7)**

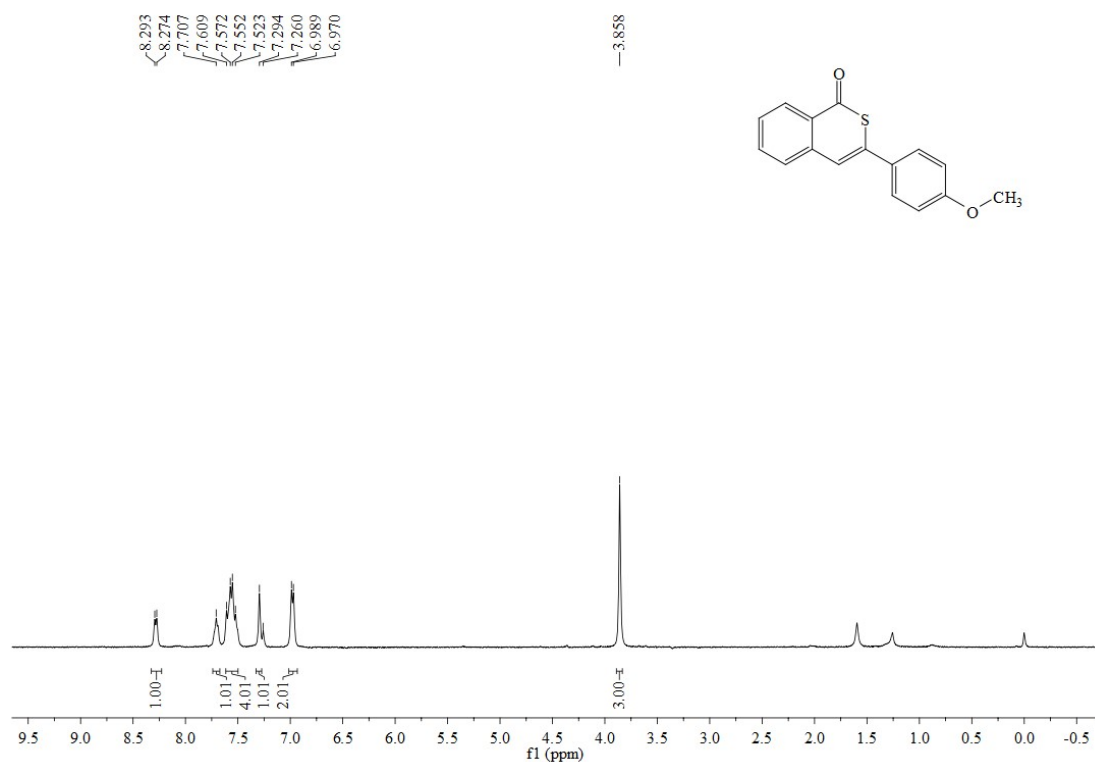

**<sup>1</sup>H NMR 400 MHz, in CDCl<sub>3</sub>: 3-(4-methoxyphenyl)-1*H*-isothiochromen-1-one (8)**

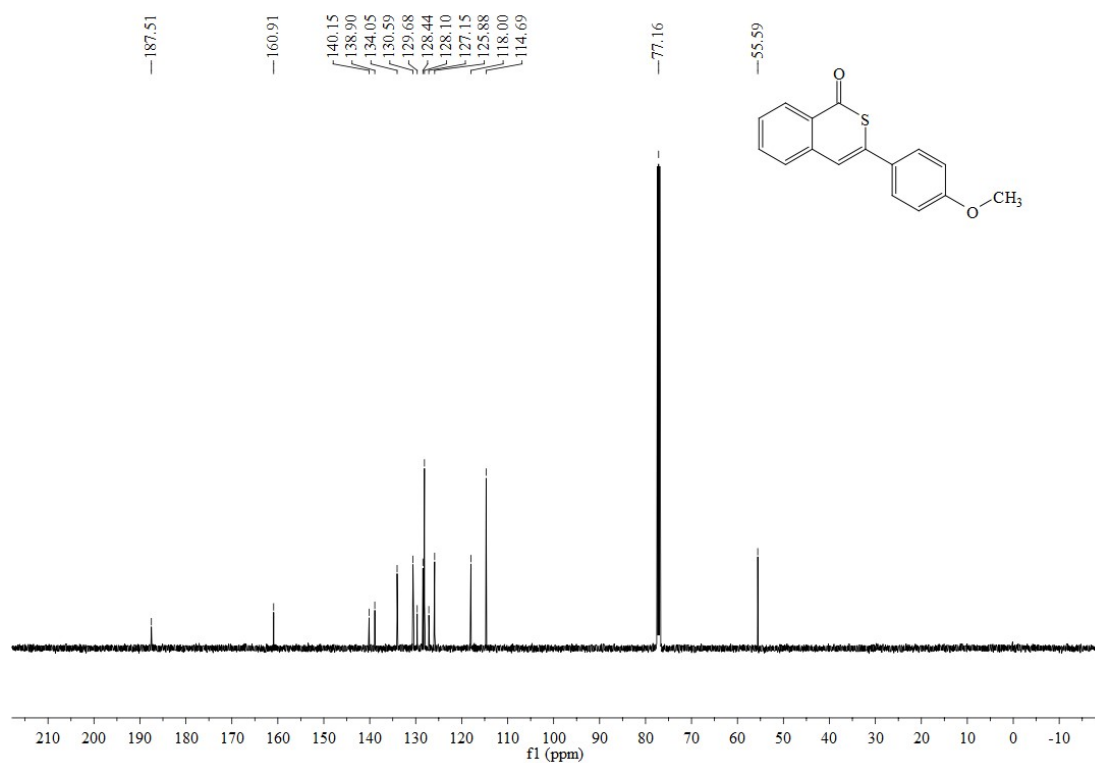

**<sup>13</sup>C{<sup>1</sup>H} NMR 125 MHz, in CDCl<sub>3</sub>: 3-(4-methoxyphenyl)-1*H*-isothiochromen-1-one (8)**

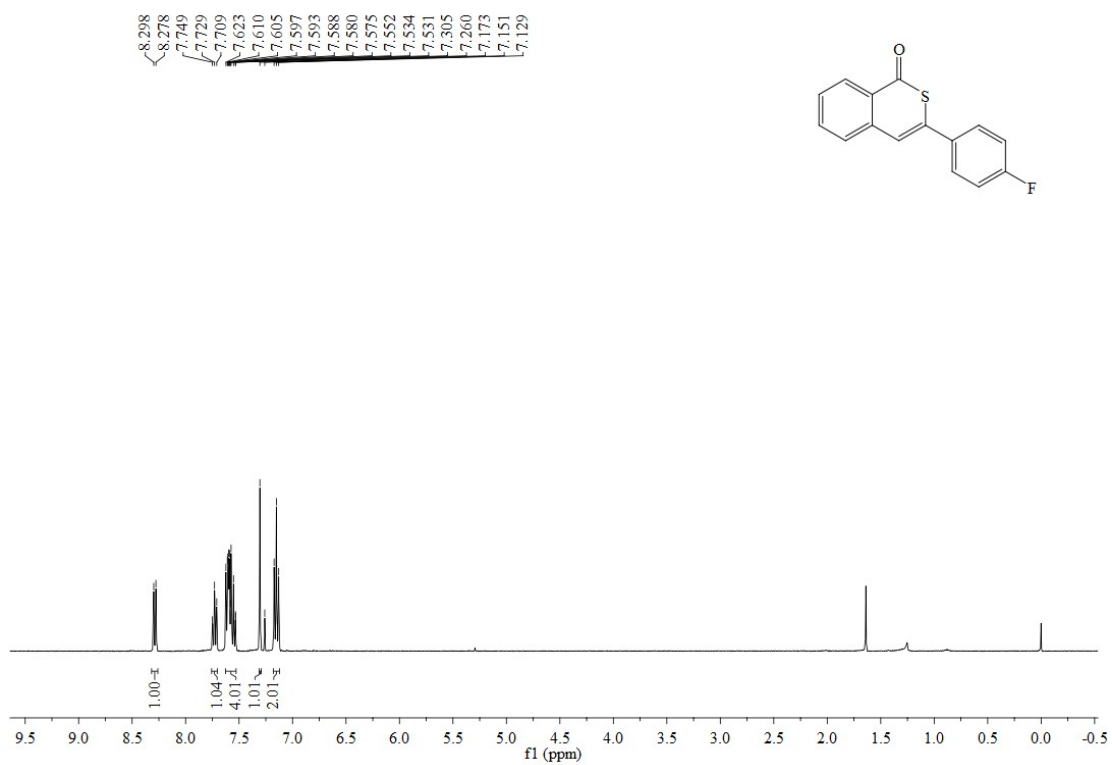

**<sup>1</sup>H NMR 400 MHz, in CDCl<sub>3</sub>: 3-(4-fluorophenyl)-1*H*-isothiochromen-1-one (9)**

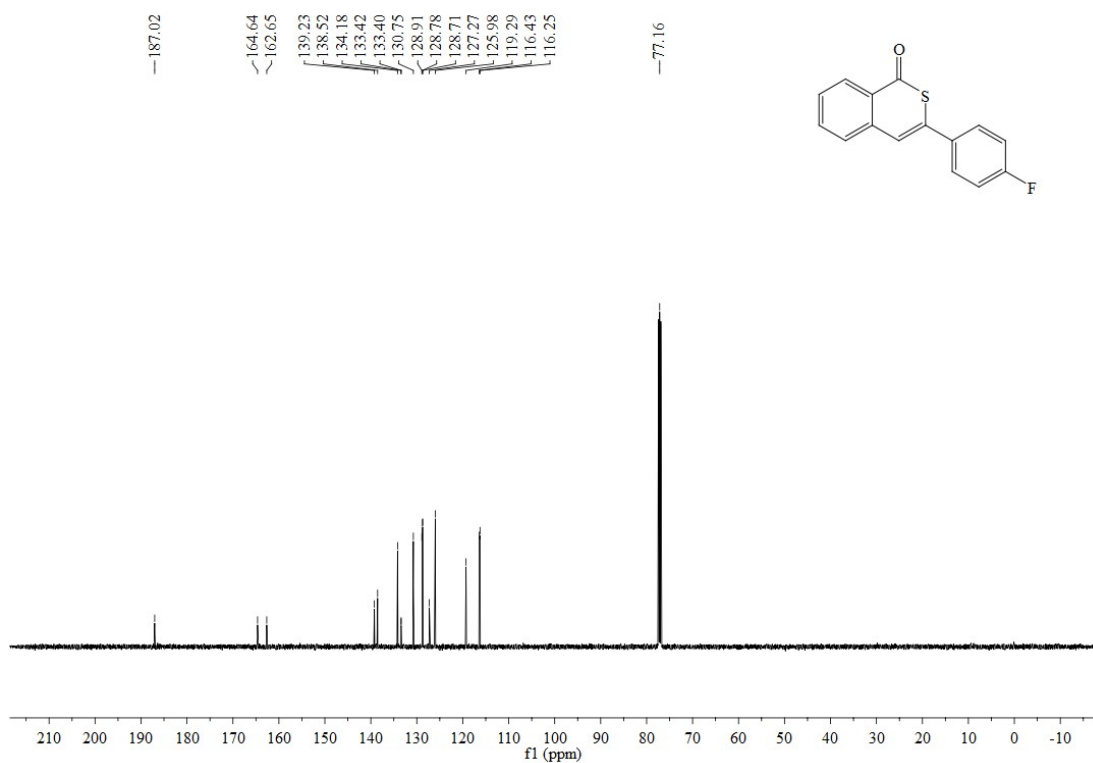

**<sup>13</sup>C{<sup>1</sup>H} NMR 125 MHz, in CDCl<sub>3</sub>: 3-(4-fluorophenyl)-1*H*-isothiochromen-1-one**

(9)

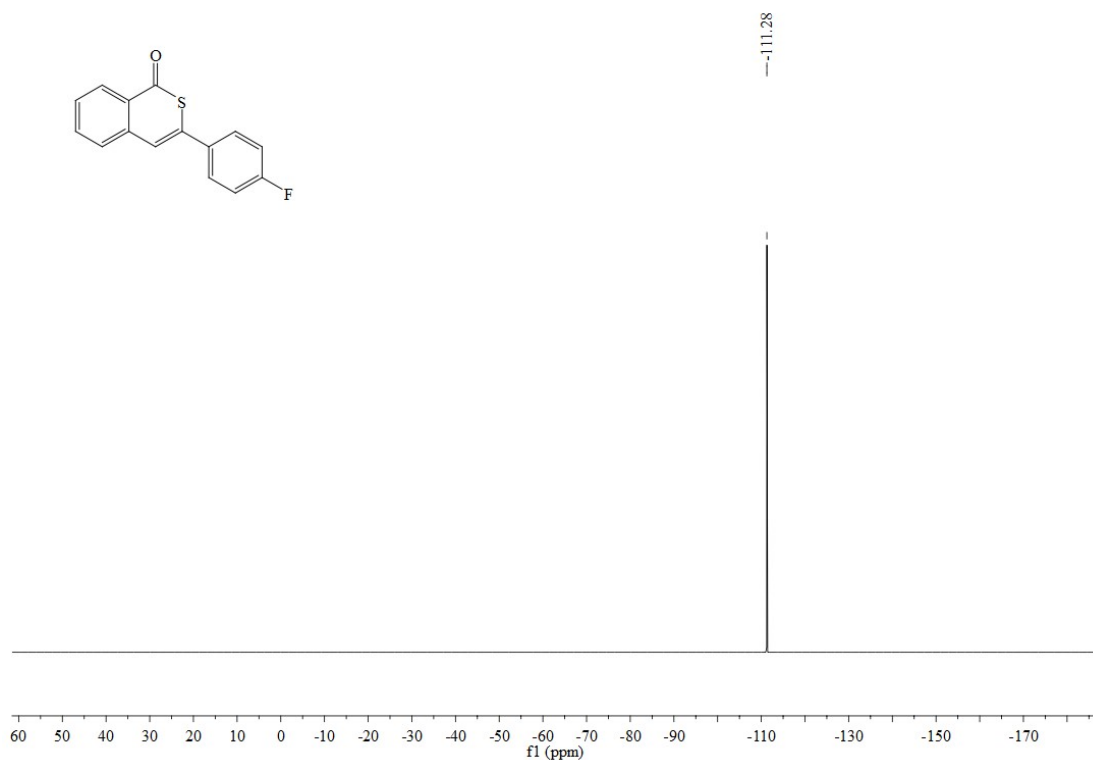

$^{19}\text{F}$  NMR 470 MHz, in  $\text{CDCl}_3$ : 3-(4-fluorophenyl)-1H-isothiochromen-1-one (9)

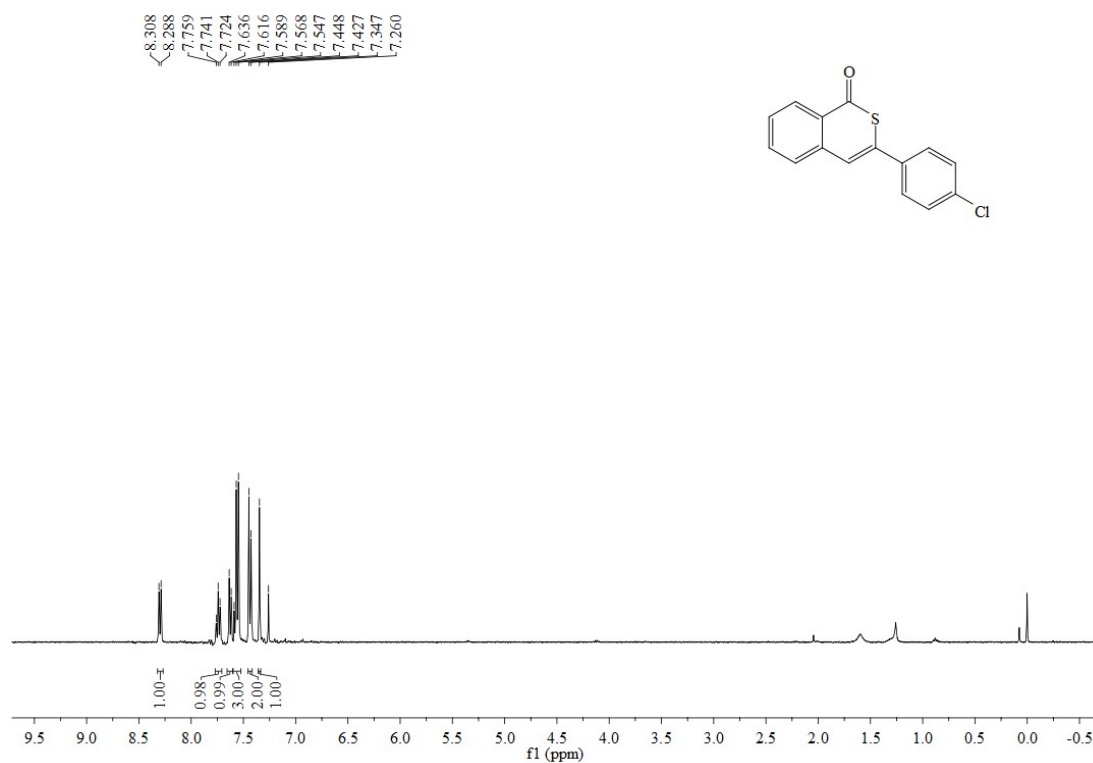

$^1\text{H}$  NMR 400 MHz, in  $\text{CDCl}_3$ : 3-(4-chlorophenyl)-1H-isothiochromen-1-one (10)

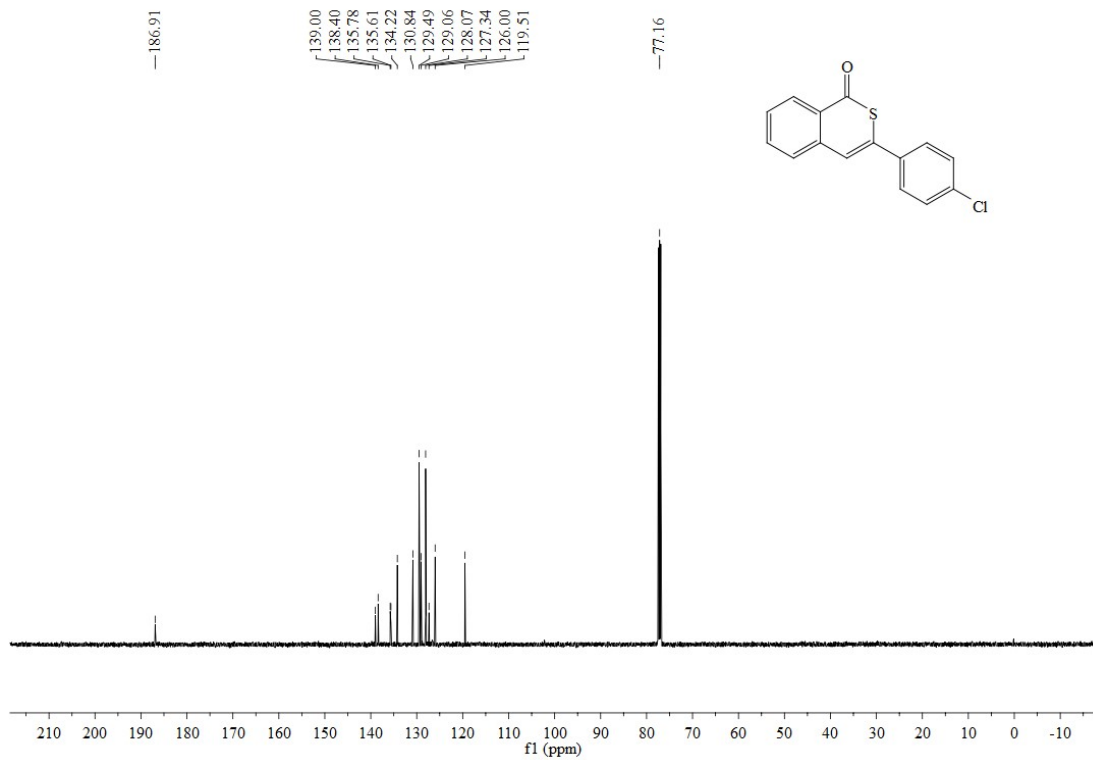

$^{13}\text{C}\{^1\text{H}\}$  NMR 125 MHz, in  $\text{CDCl}_3$ : 3-(4-chlorophenyl)-1H-isothiochromen-1-one (10)

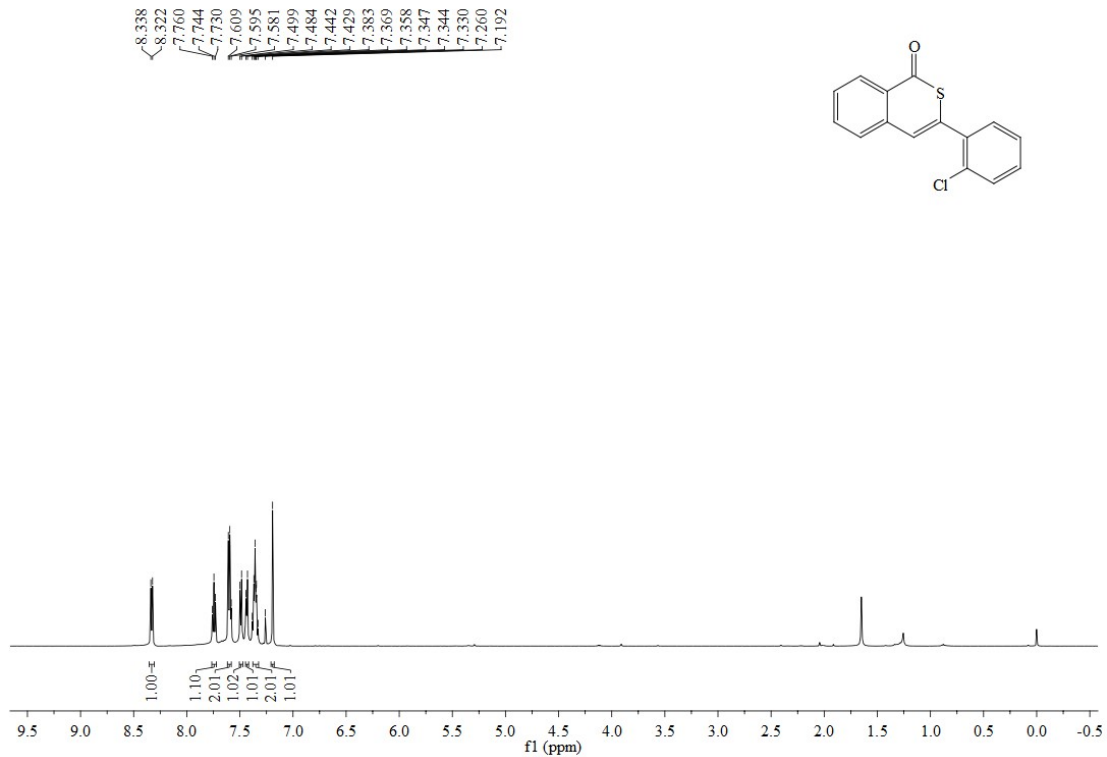

$^1\text{H}$  NMR 500 MHz, in  $\text{CDCl}_3$ : 3-(2-chlorophenyl)-1H-isothiochromen-1-one (11)



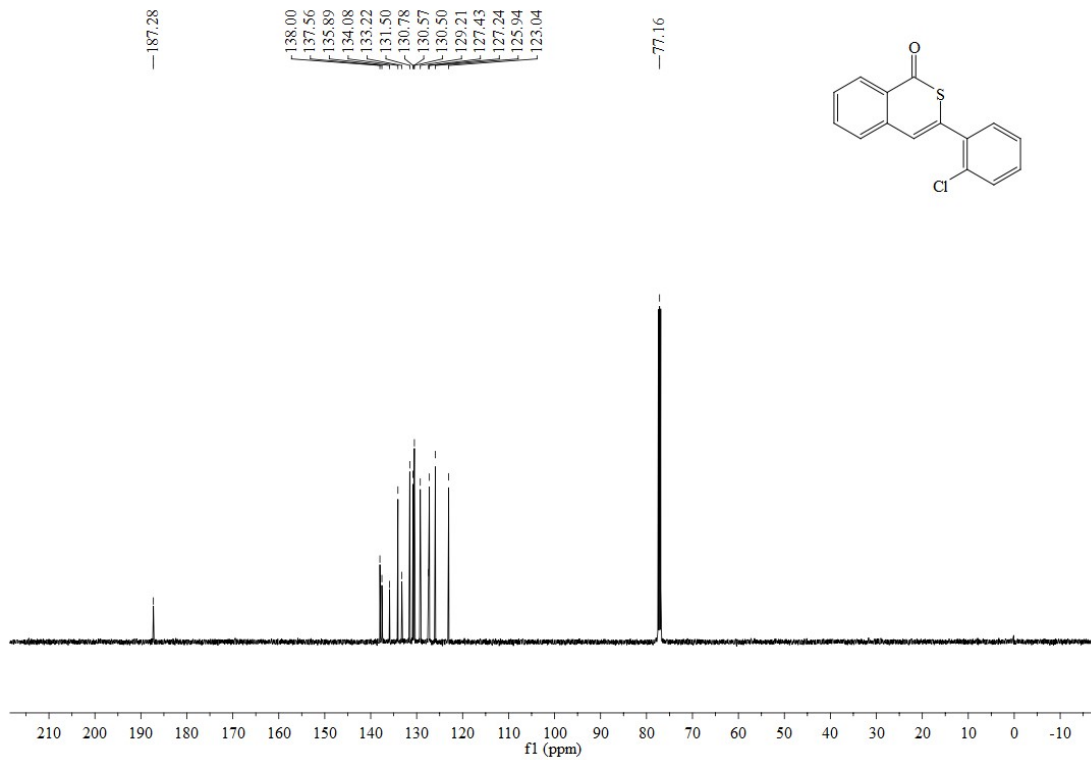

$^{13}\text{C}\{^1\text{H}\}$  NMR 125 MHz, in  $\text{CDCl}_3$ : 3-(2-chlorophenyl)-1H-isothiochromen-1-one (11)

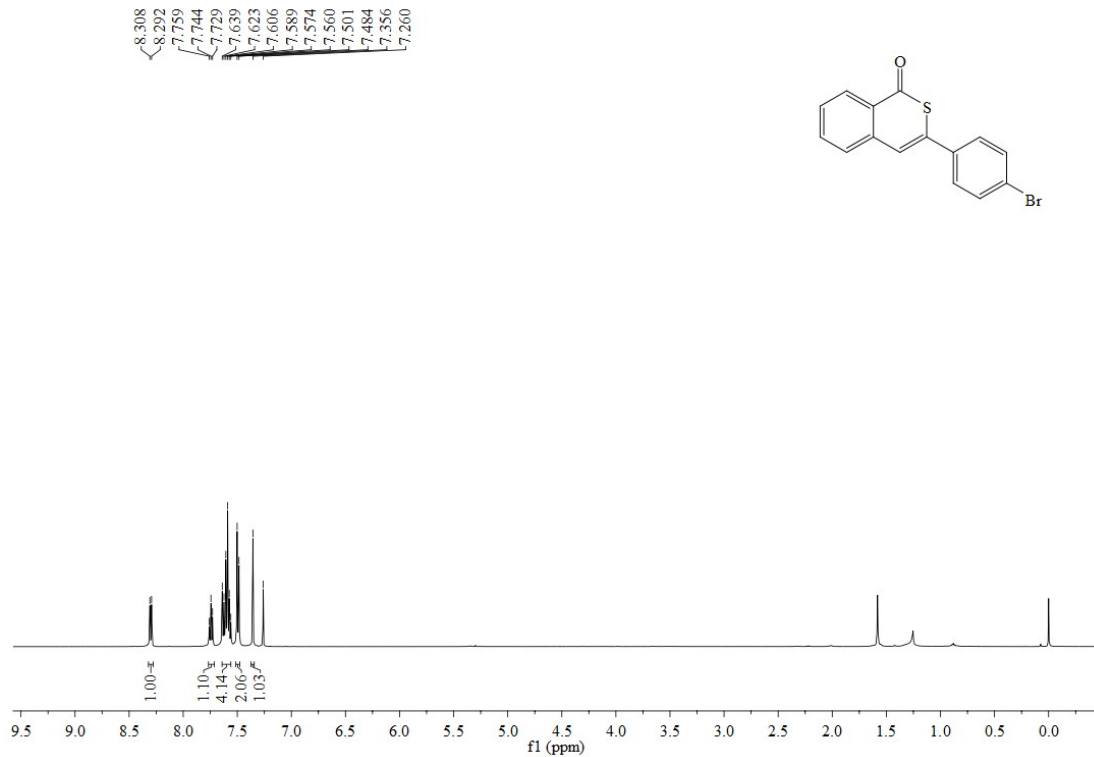

$^1\text{H}$  NMR 500 MHz, in  $\text{CDCl}_3$ : 3-(4-bromophenyl)-1H-isothiochromen-1-one (12)

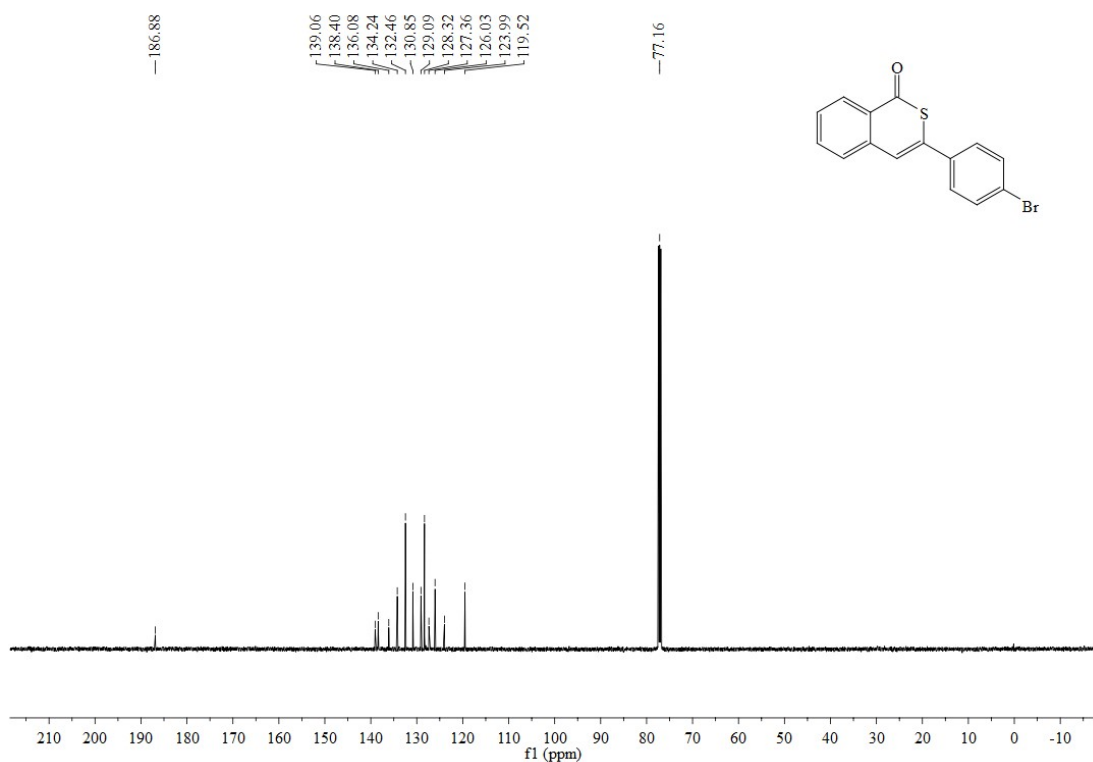

$^{13}\text{C}\{^1\text{H}\}$  NMR 125 MHz, in  $\text{CDCl}_3$ : 3-(4-bromophenyl)-1*H*-isothiochromen-1-one (12)

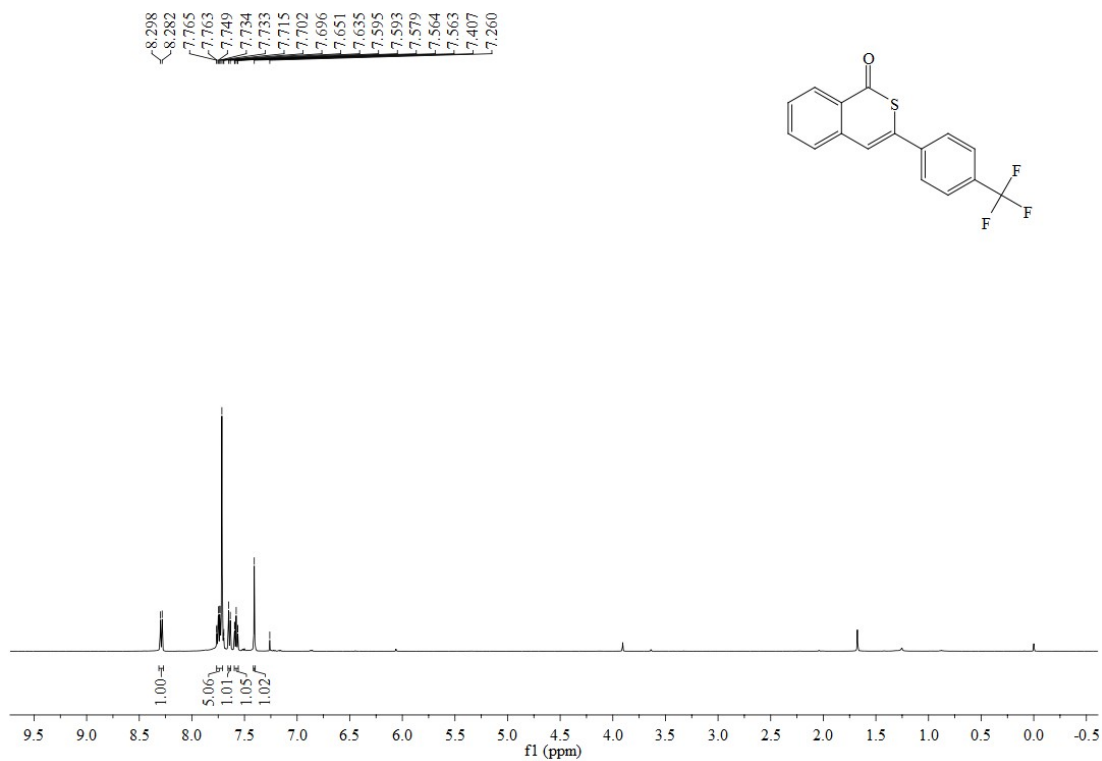

$^1\text{H}$  NMR 500 MHz, in  $\text{CDCl}_3$ : 3-(4-(trifluoromethyl)phenyl)-1*H*-isothiochromen-1-one (13)

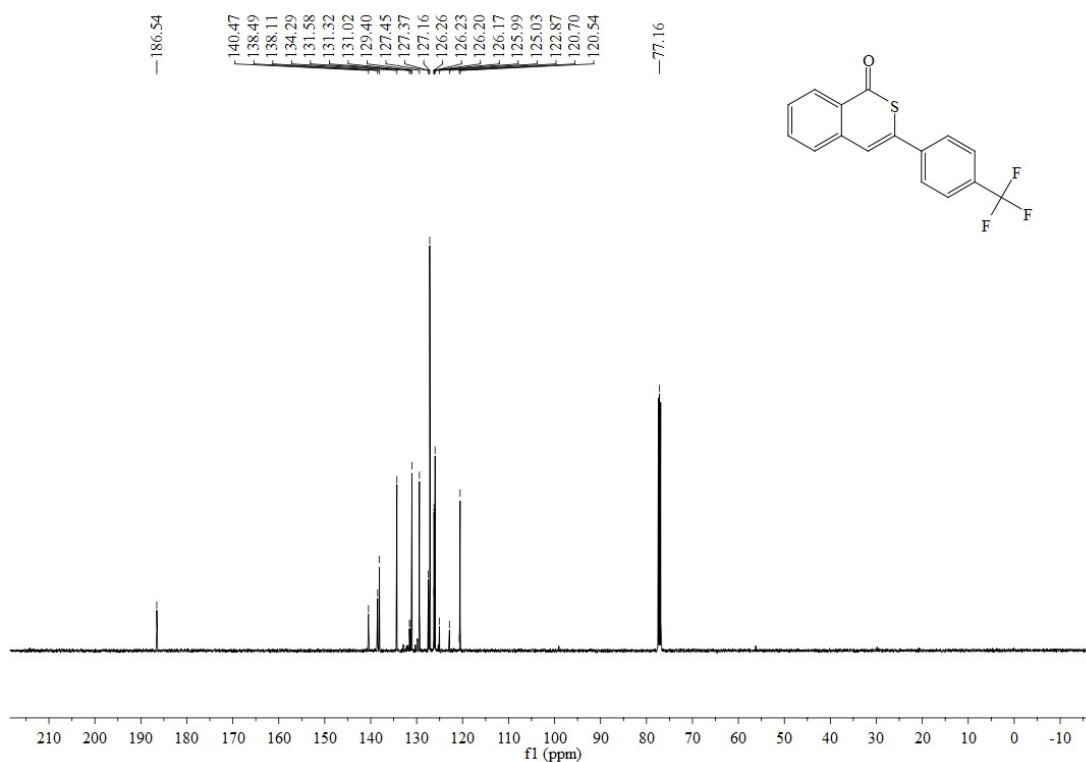

**$^{13}\text{C}\{^1\text{H}\}$  NMR 125 MHz, in  $\text{CDCl}_3$ : 3-(4-(trifluoromethyl)phenyl)-1H-isothiochromen-1-one (13)**

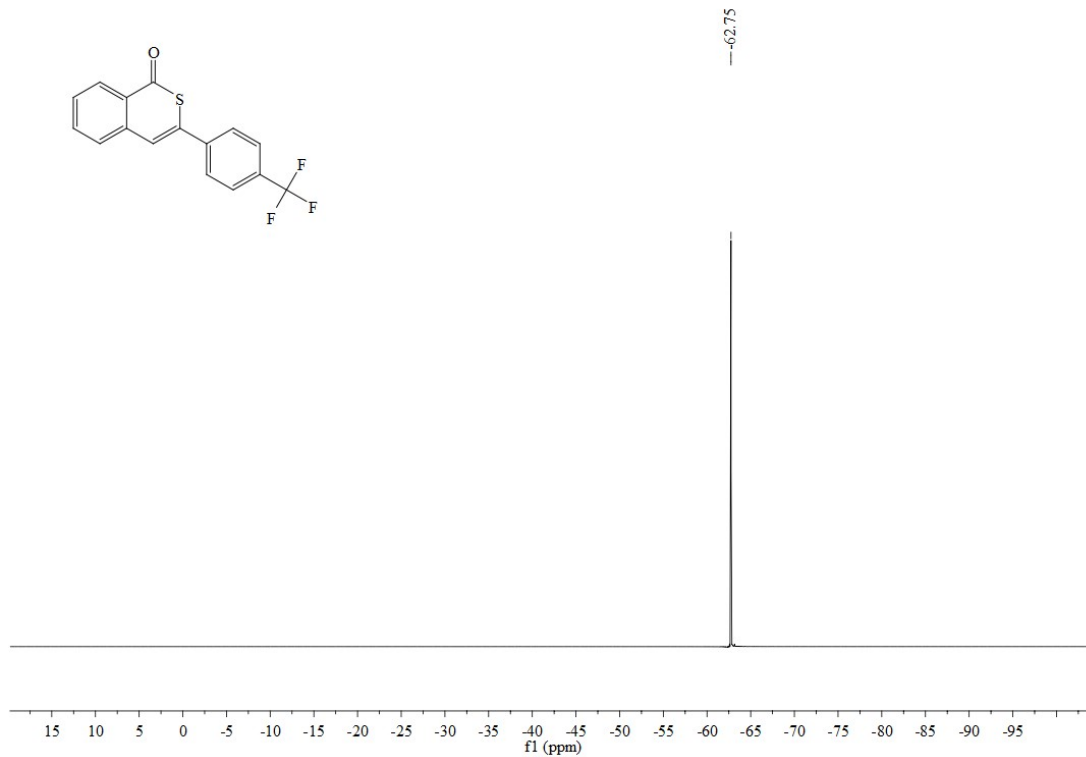

**$^{19}\text{F}$  NMR 470 MHz, in  $\text{CDCl}_3$ : 3-(4-(trifluoromethyl)phenyl)-1H-isothiochromen-1-one (13)**

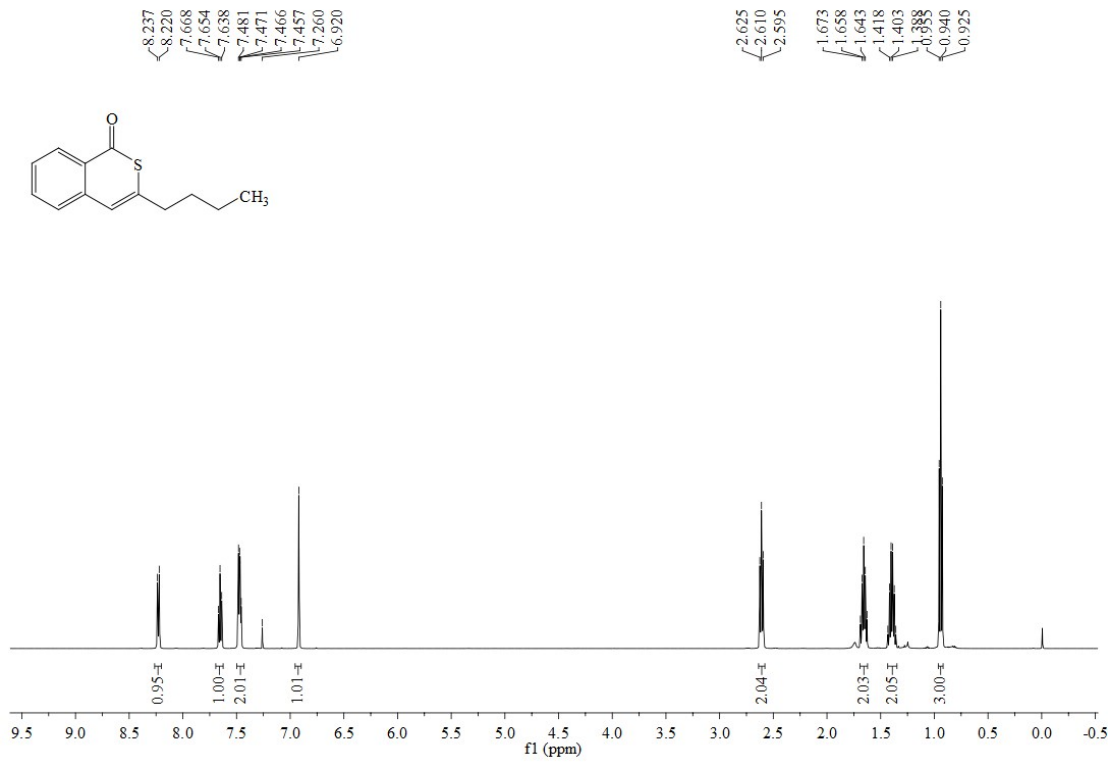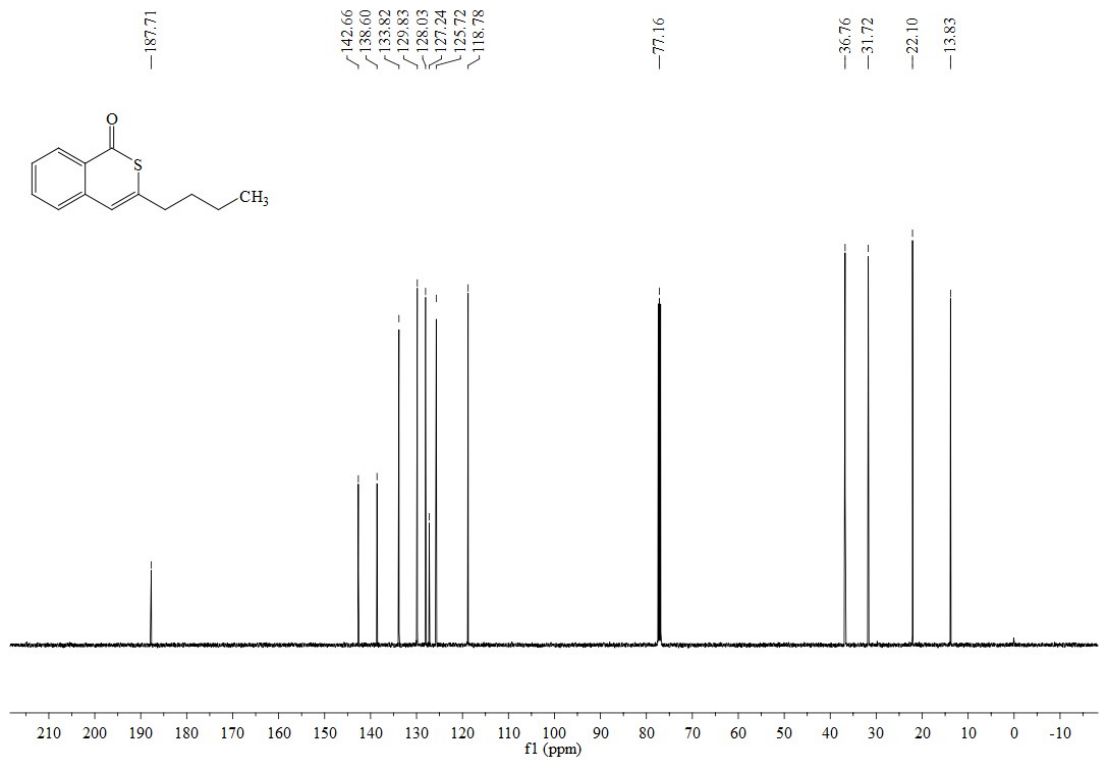

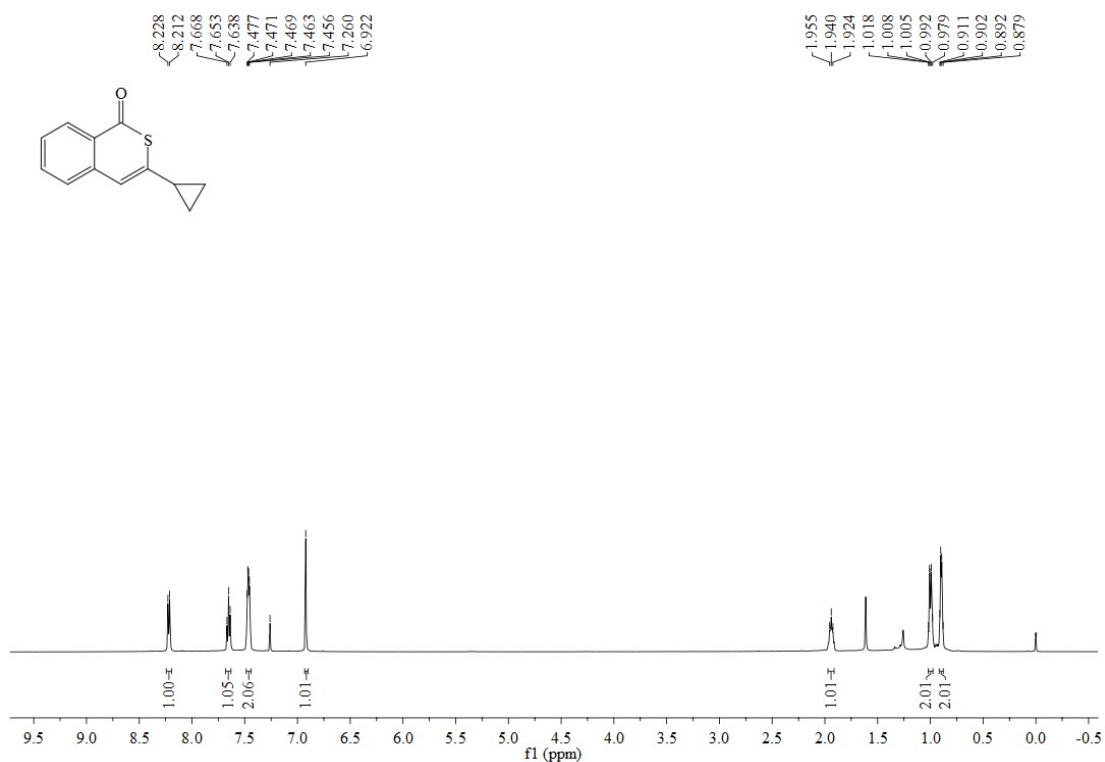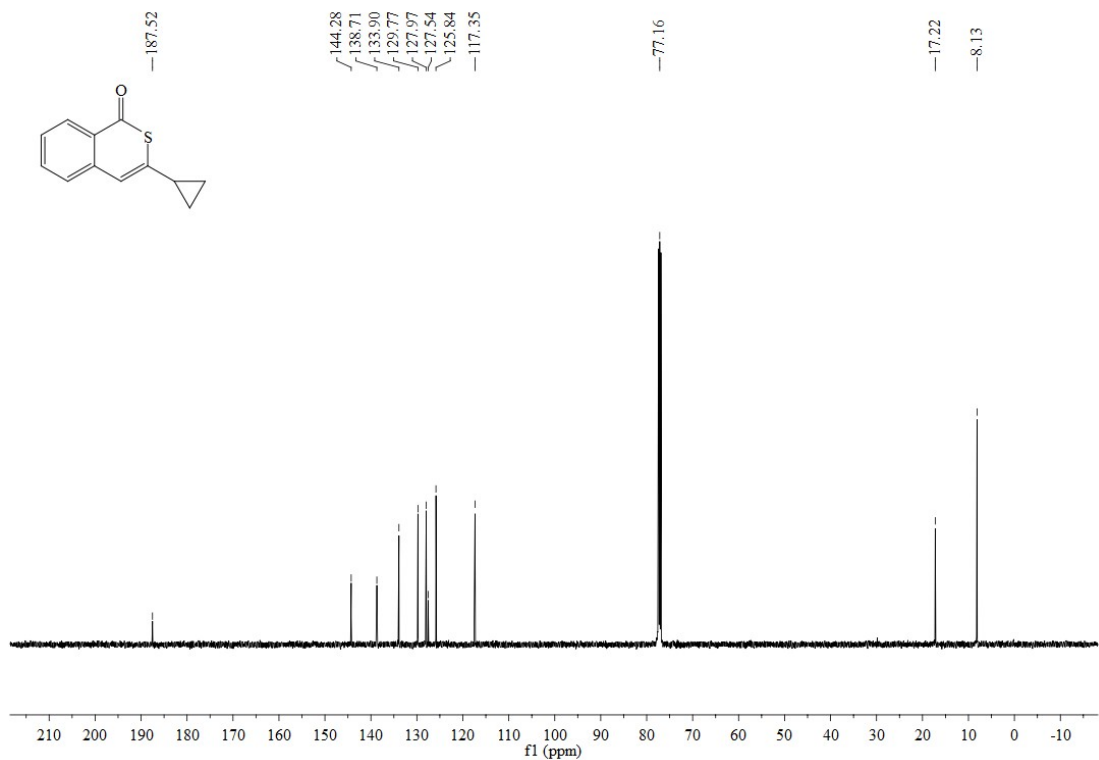

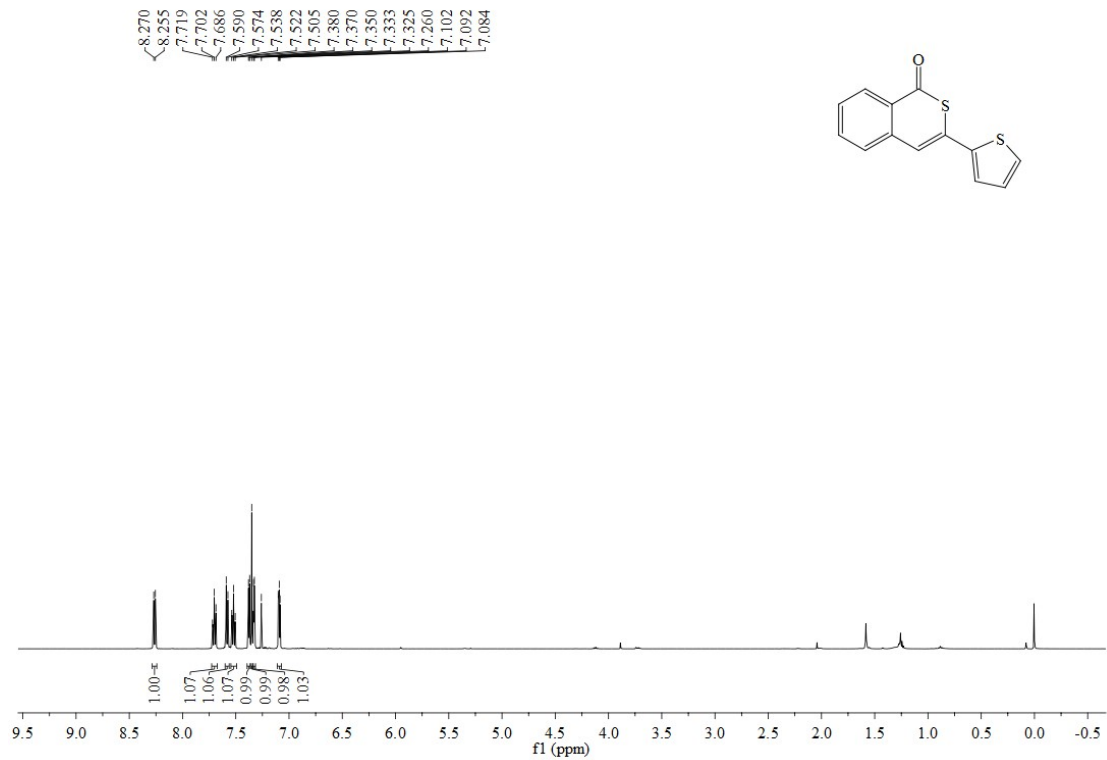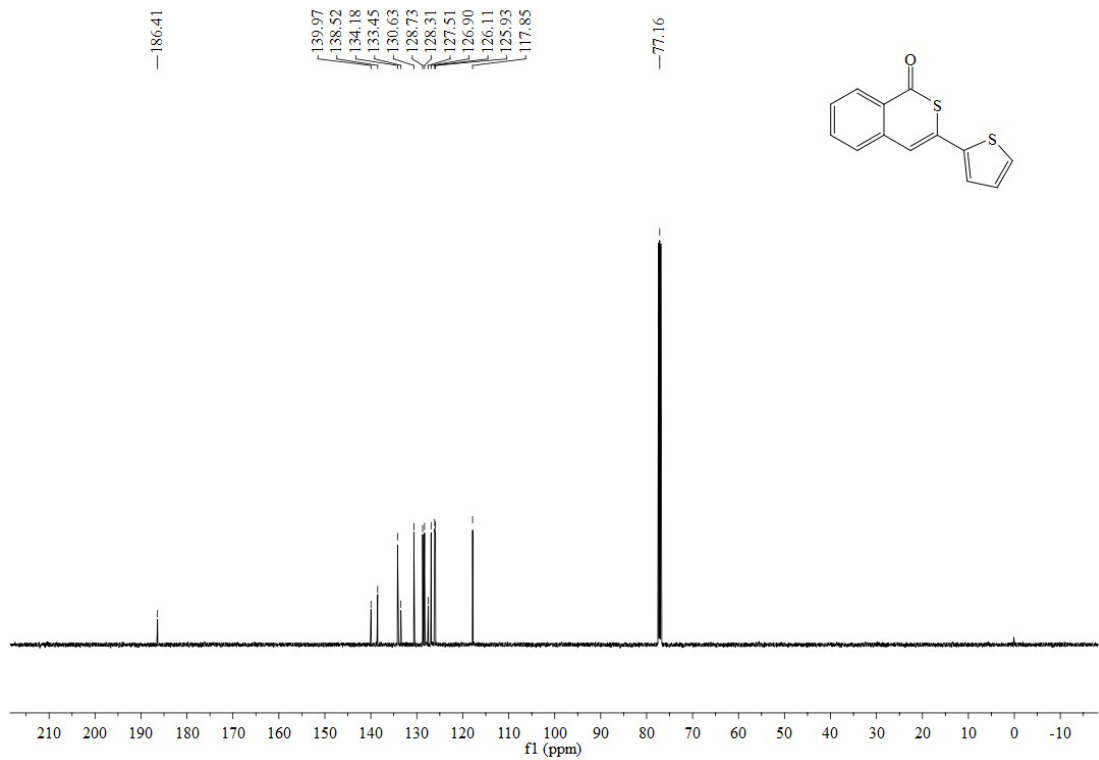

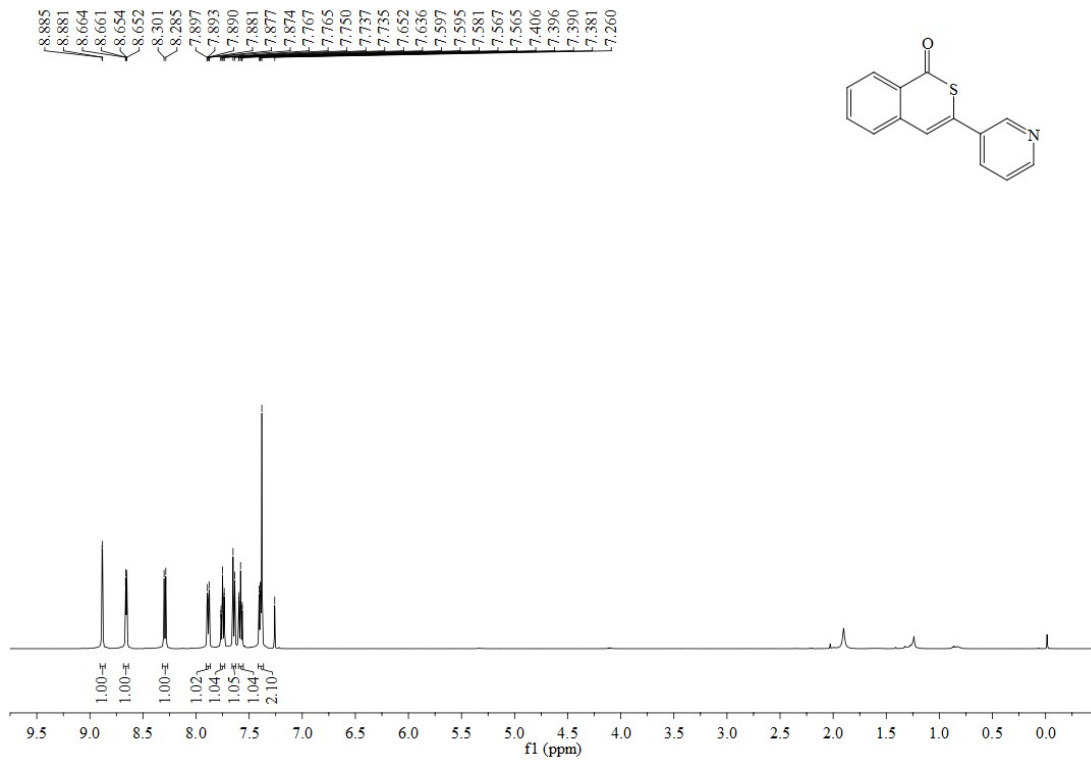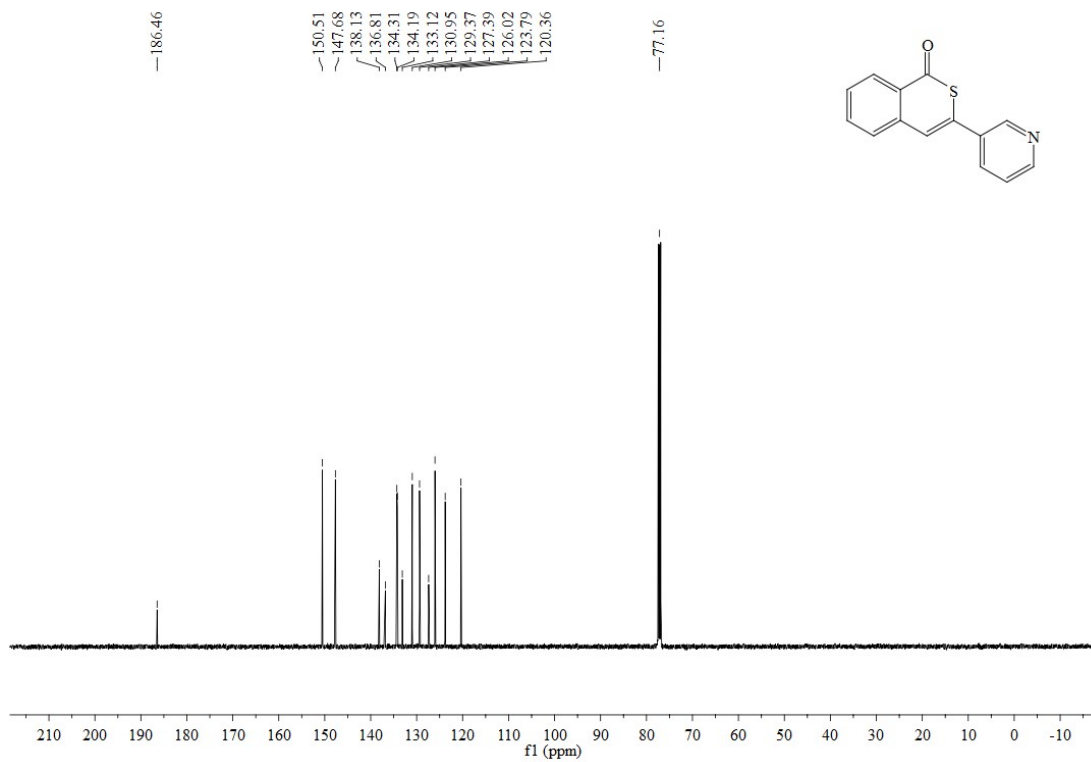

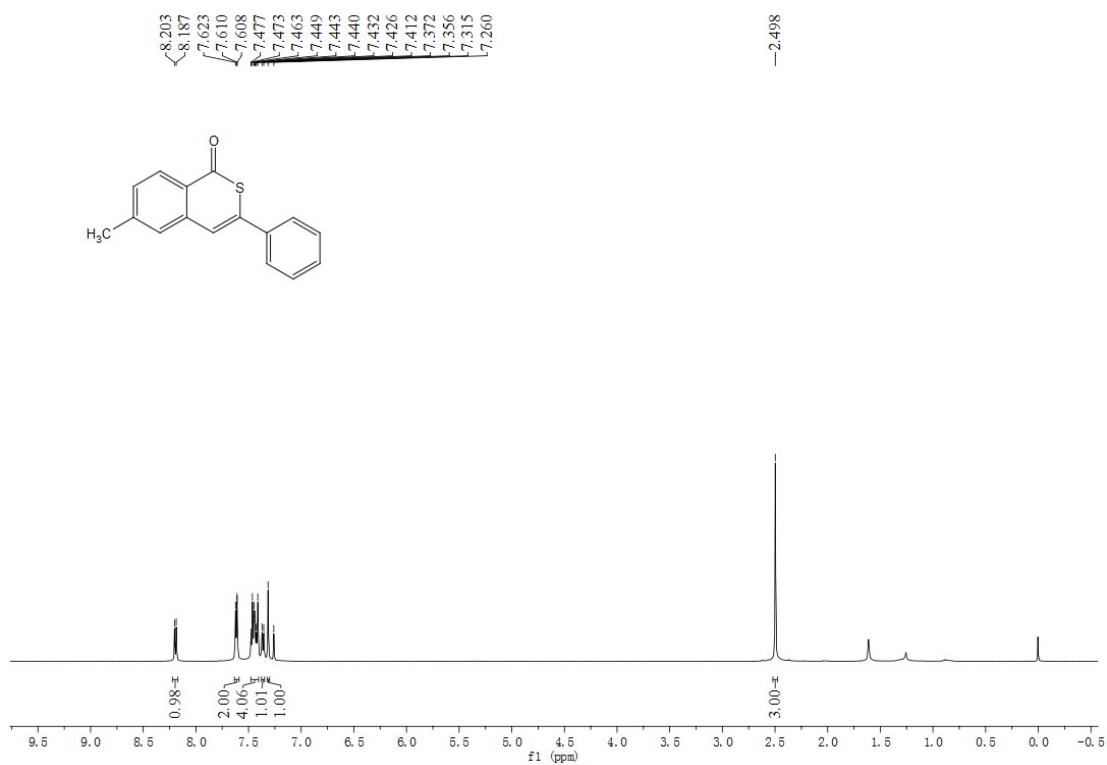

$^1\text{H}$  NMR 500 MHz, in  $\text{CDCl}_3$ : 6-methyl-3-phenyl-1*H*-isothiochromen-1-one (18)

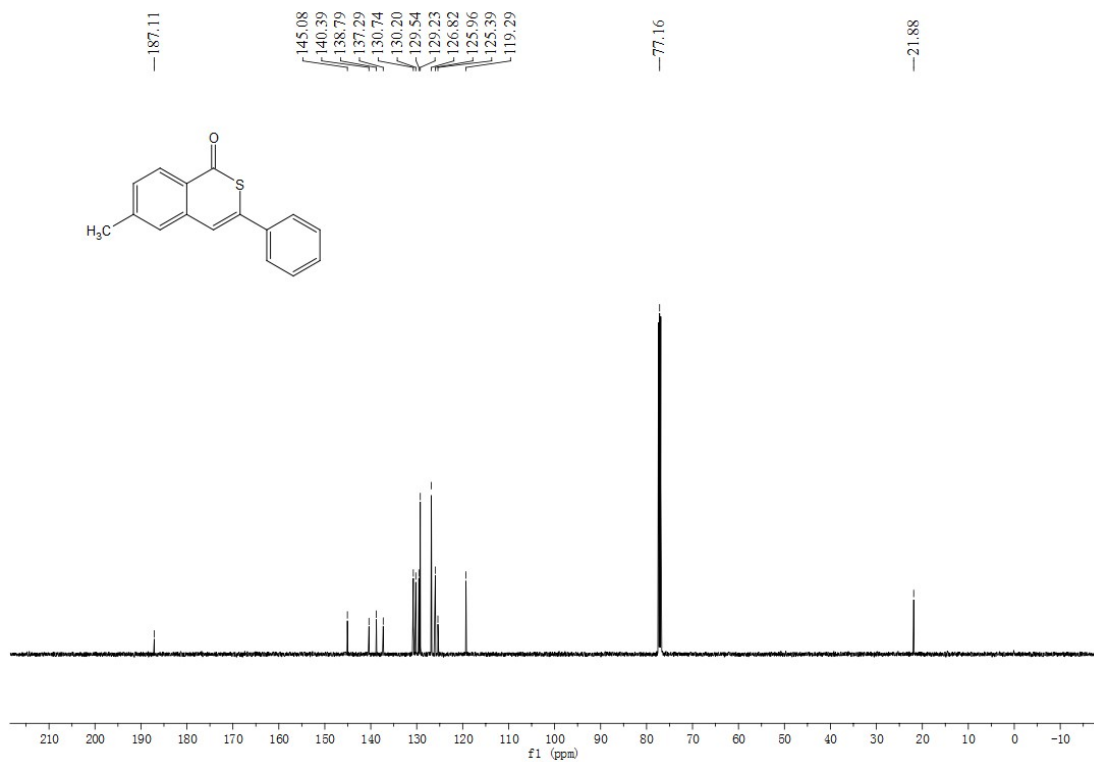

$^{13}\text{C}\{^1\text{H}\}$  NMR 125 MHz, in  $\text{CDCl}_3$ : 6-methyl-3-phenyl-1*H*-isothiochromen-1-one

(18)



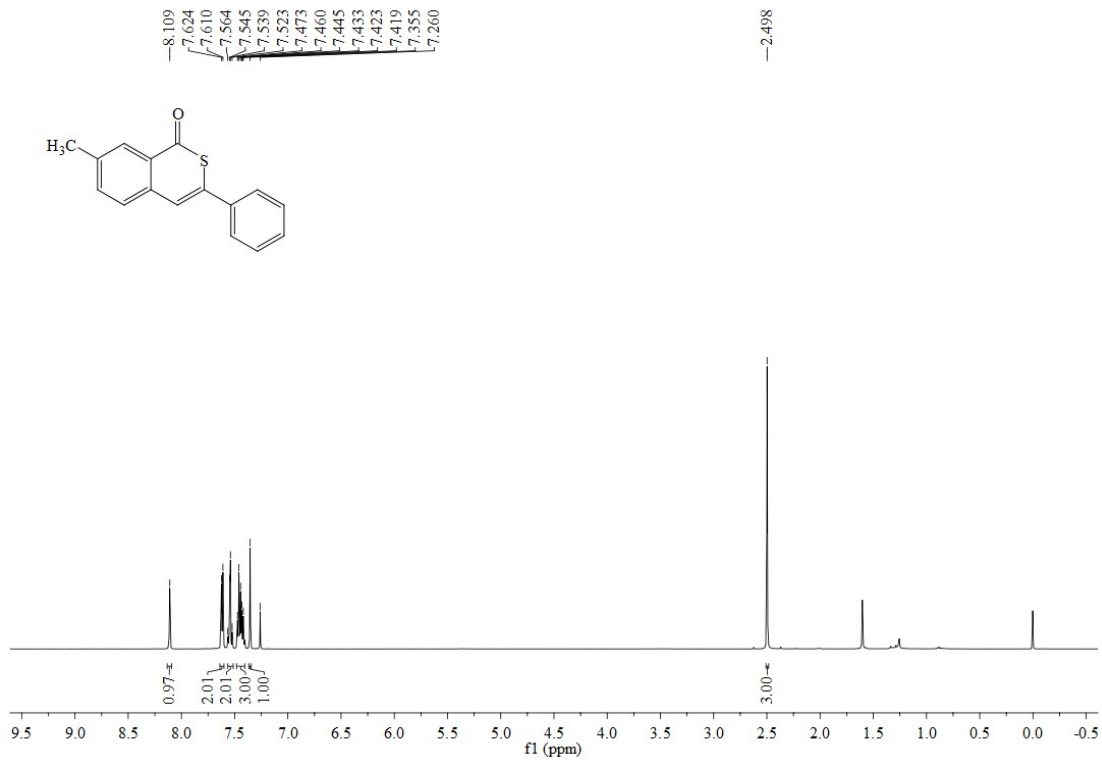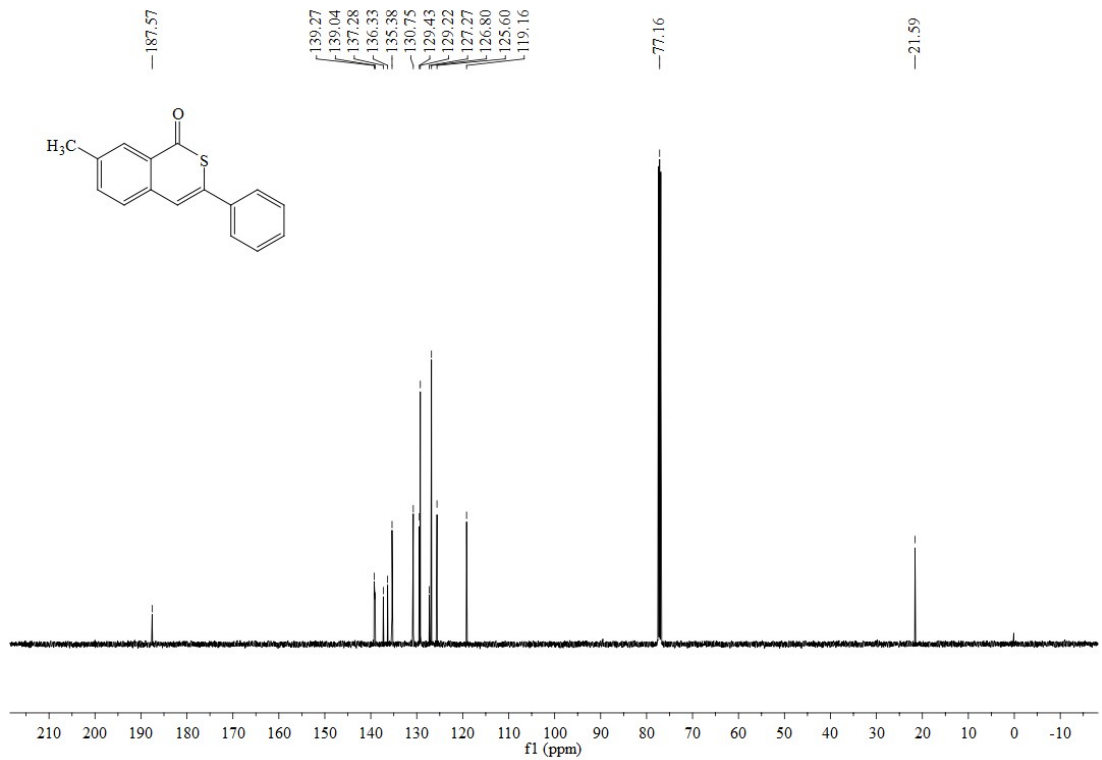

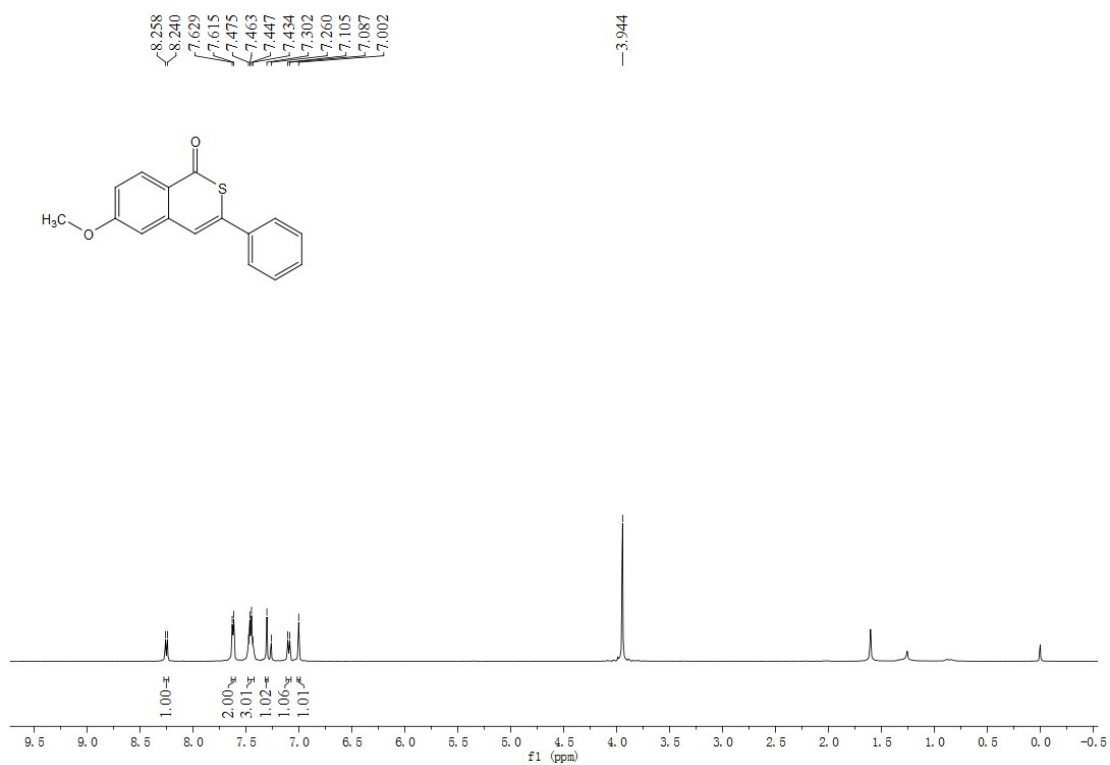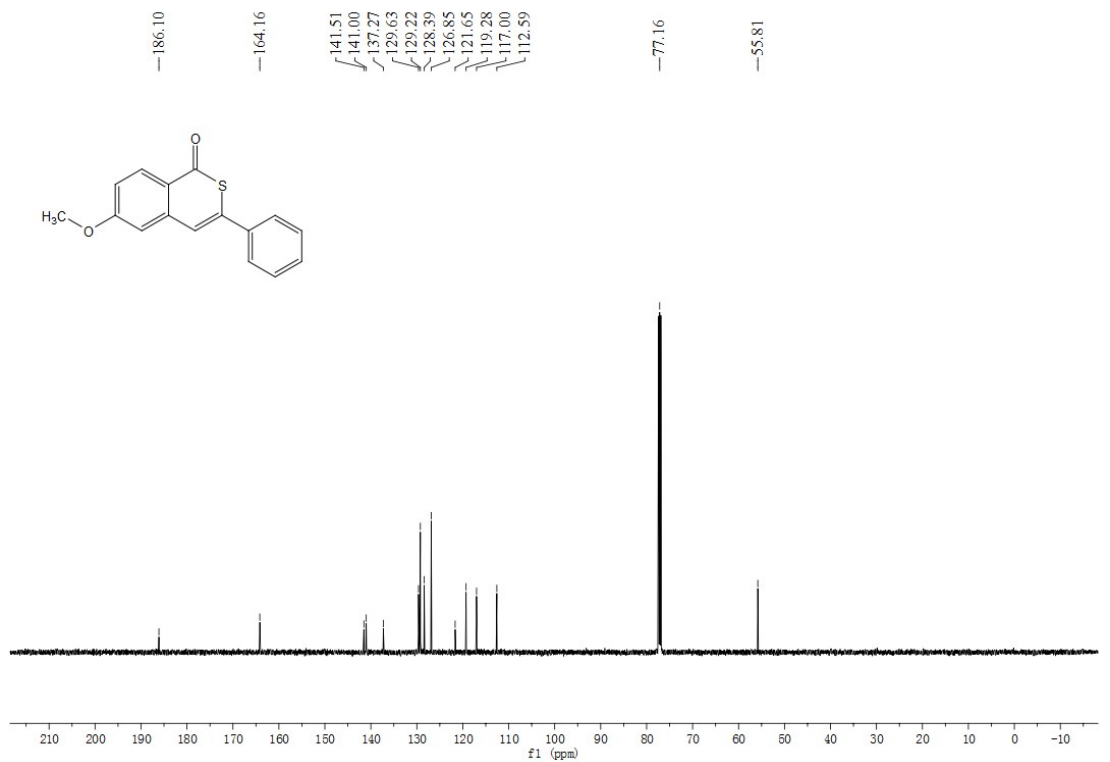

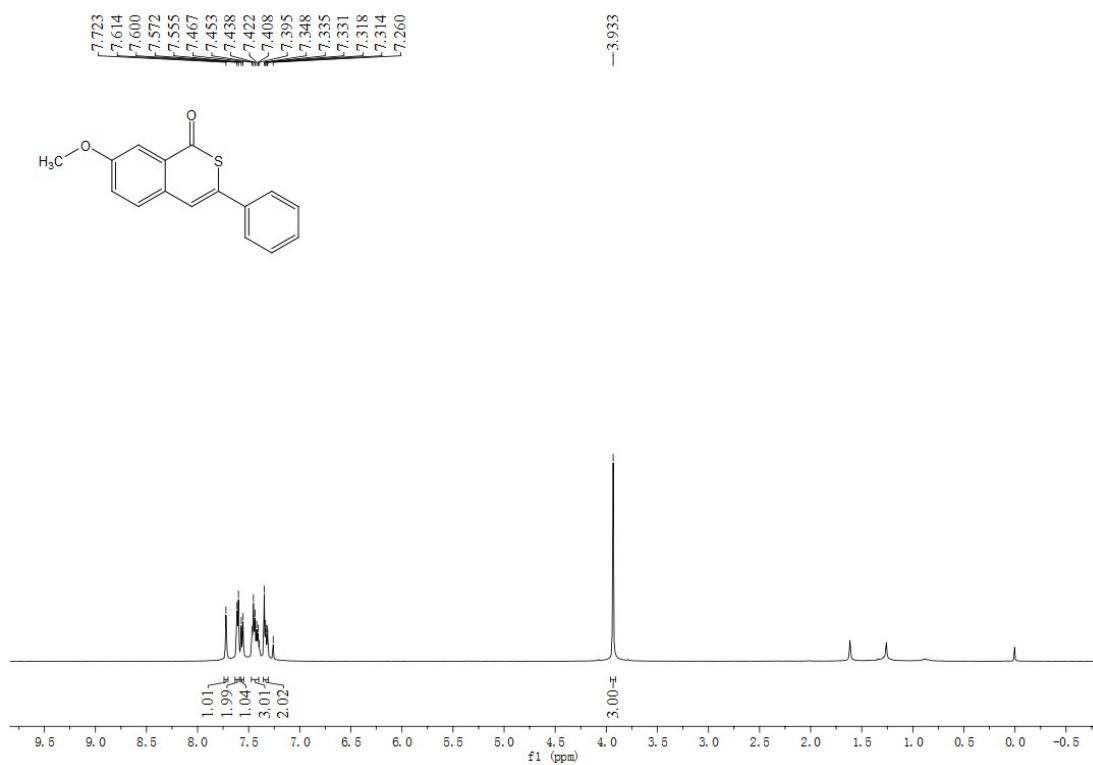

$^1\text{H}$  NMR 500 MHz, in  $\text{CDCl}_3$ : 7-methoxy-3-phenyl-1*H*-isothiochromen-1-one (21)

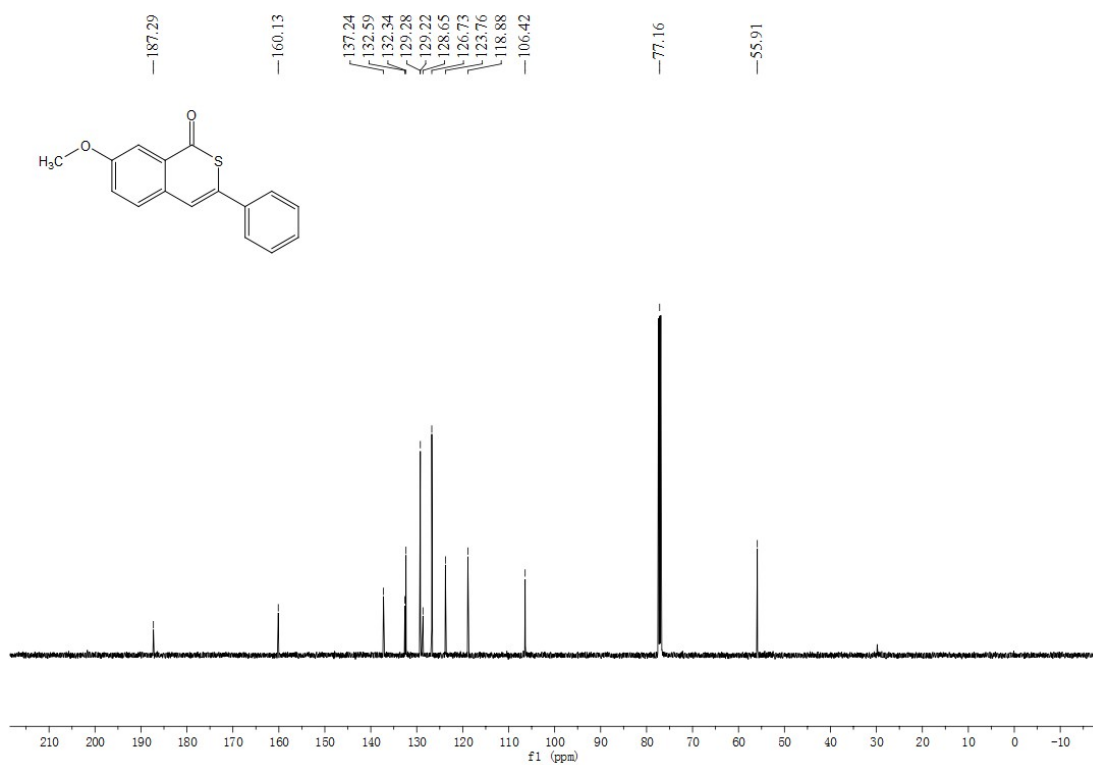

$^{13}\text{C}\{^1\text{H}\}$  NMR 125 MHz, in  $\text{CDCl}_3$ : 7-methoxy-3-phenyl-1*H*-isothiochromen-1-one (21)

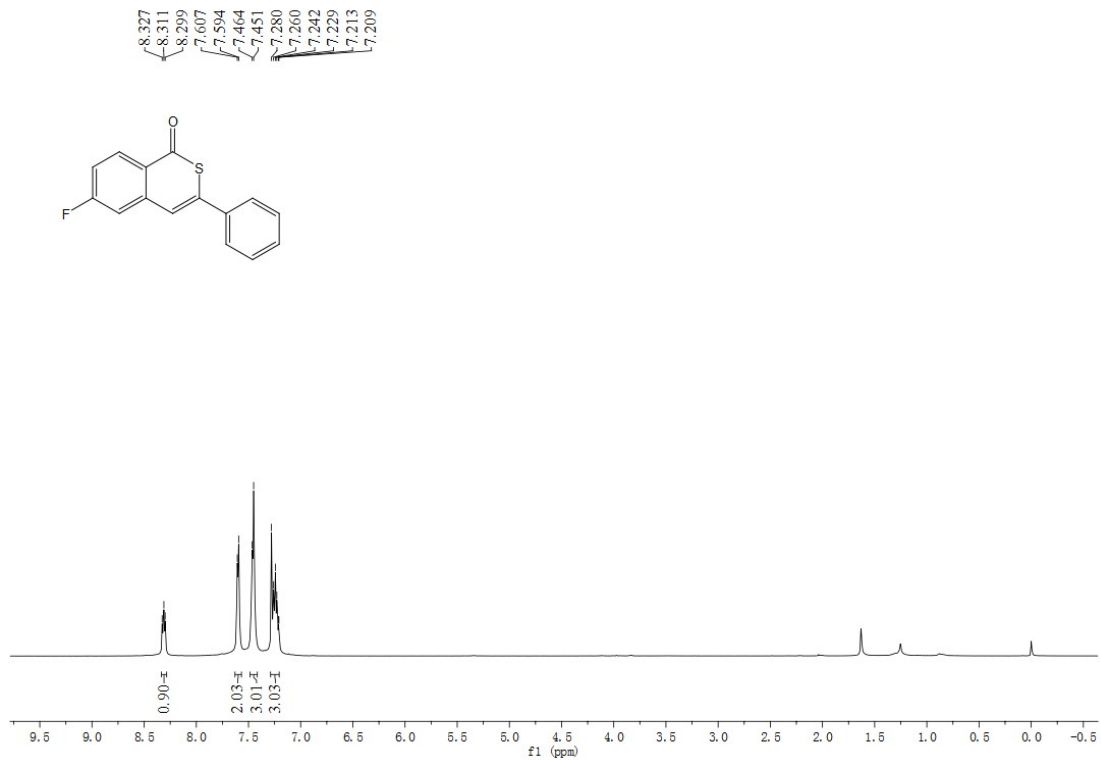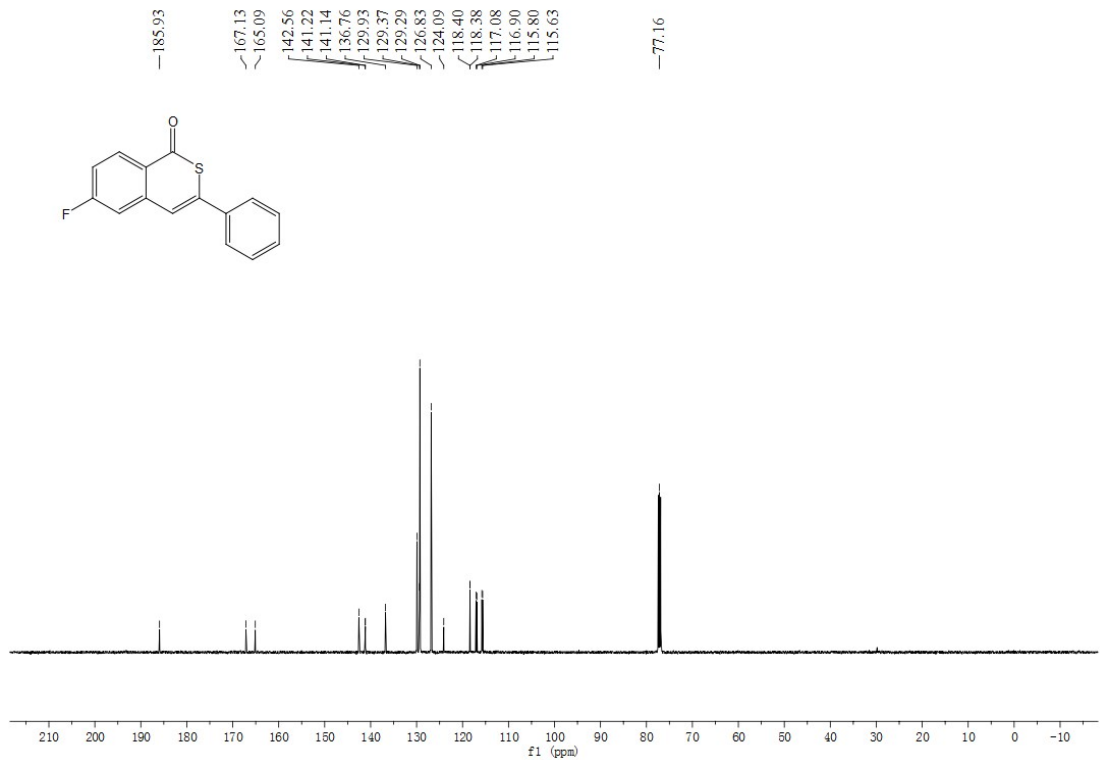

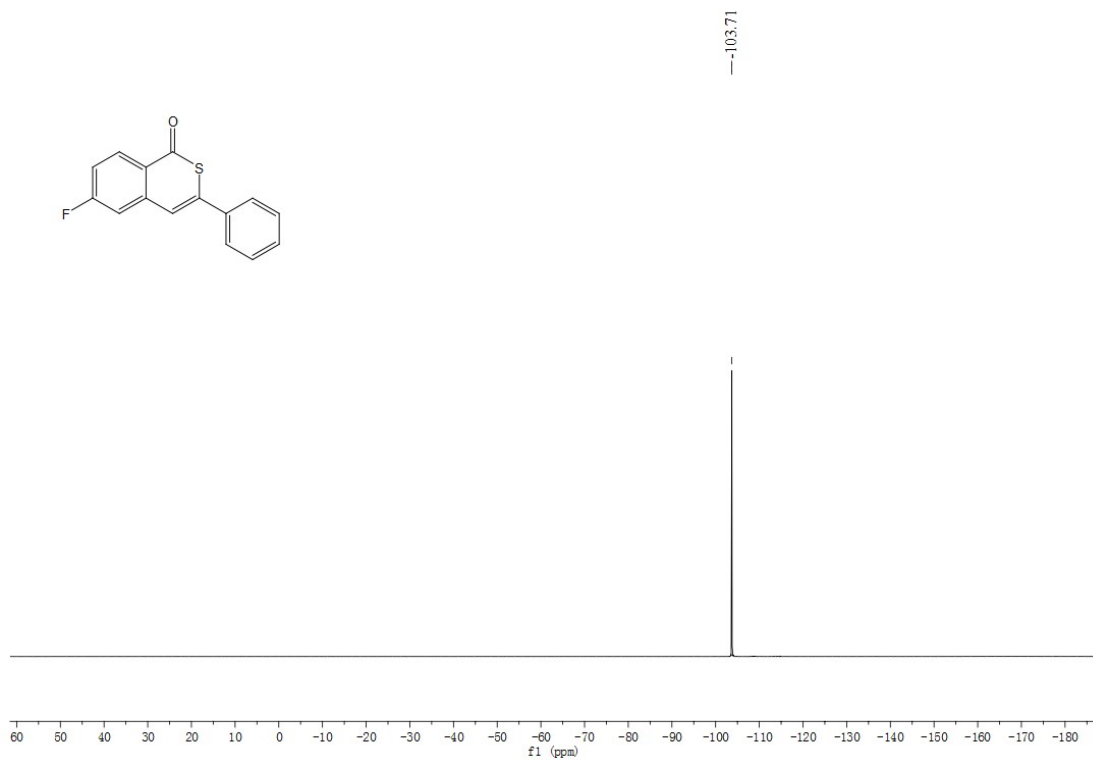

$^{19}\text{F}$  NMR 470 MHz, in  $\text{CDCl}_3$ : 6-fluoro-3-phenyl-1*H*-isothiochromen-1-one (22)

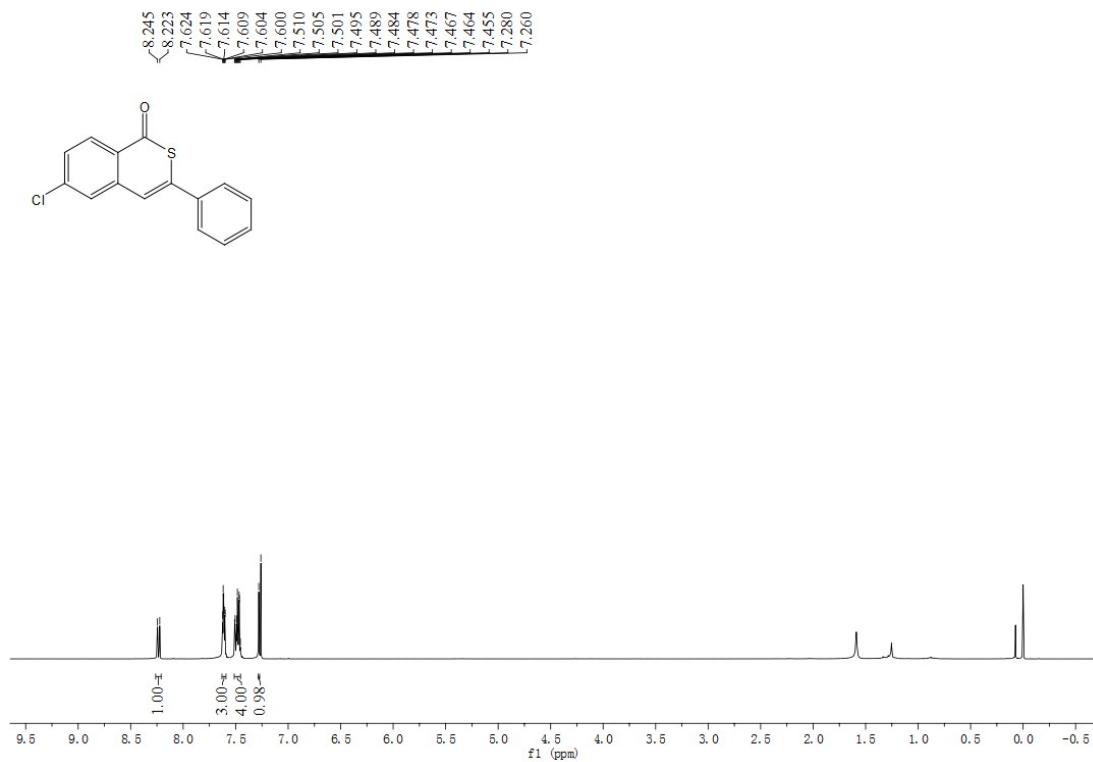

$^1\text{H}$  NMR 400 MHz, in  $\text{CDCl}_3$ : 6-chloro-3-phenyl-1*H*-isothiochromen-1-one (23)

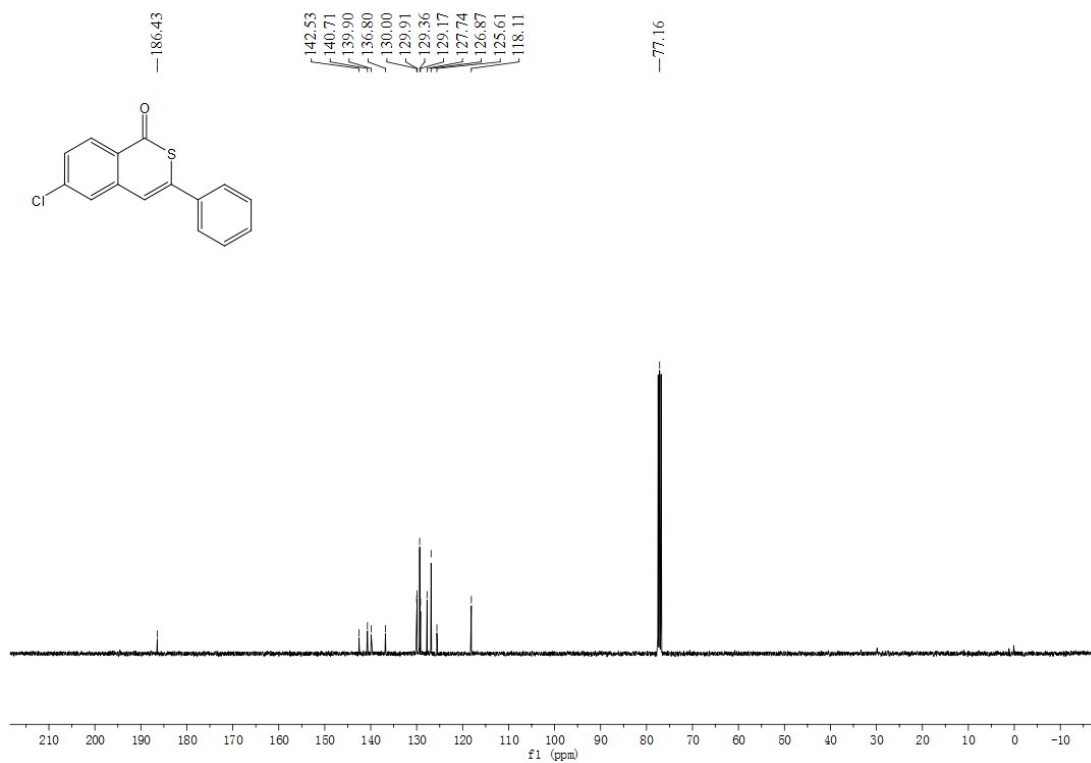

$^{13}\text{C}\{^1\text{H}\}$  NMR 100 MHz, in  $\text{CDCl}_3$ : 6-chloro-3-phenyl-1H-isothiochromen-1-one (23)

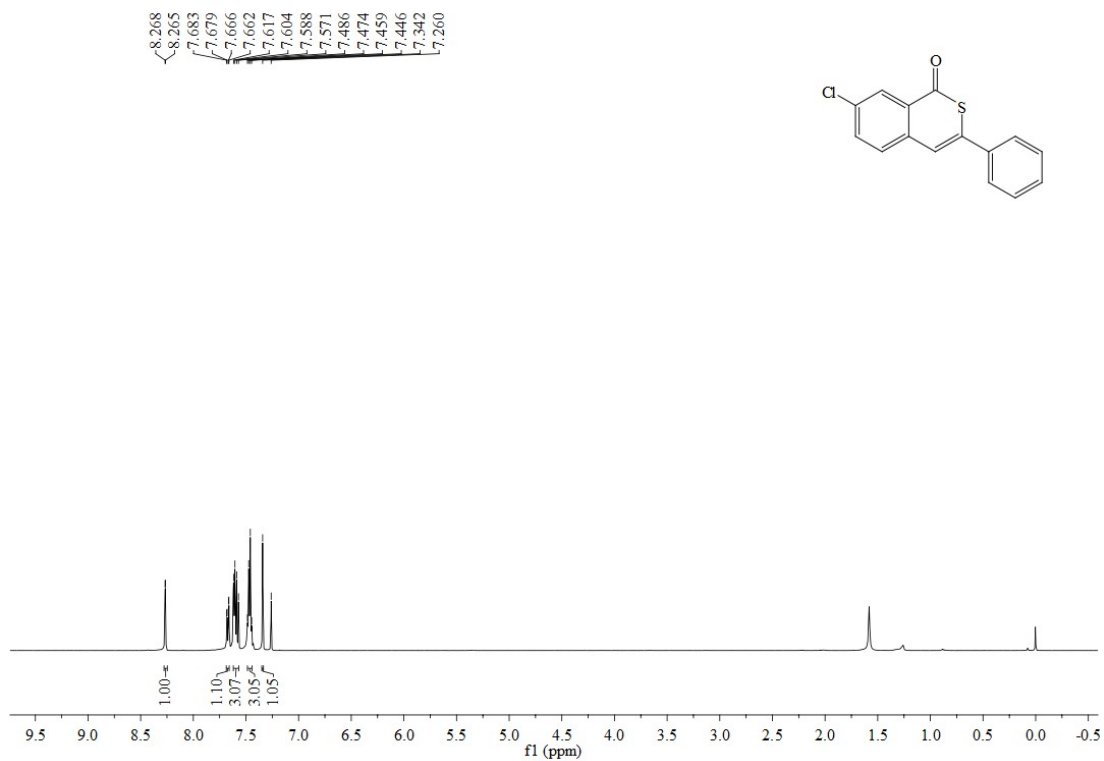

$^1\text{H}$  NMR 500 MHz, in  $\text{CDCl}_3$ : 7-chloro-3-phenyl-1H-isothiochromen-1-one (24)

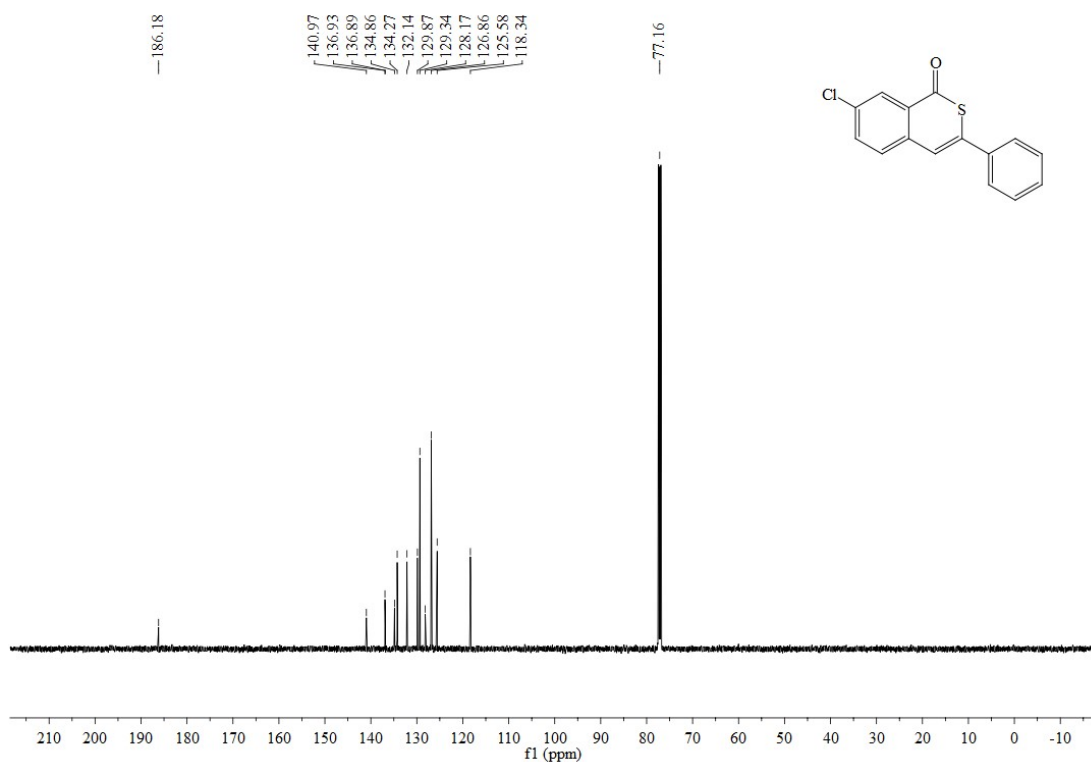

$^{13}\text{C}\{^1\text{H}\}$  NMR 125 MHz, in  $\text{CDCl}_3$ : 7-chloro-3-phenyl-1*H*-isothiochromen-1-one (24)

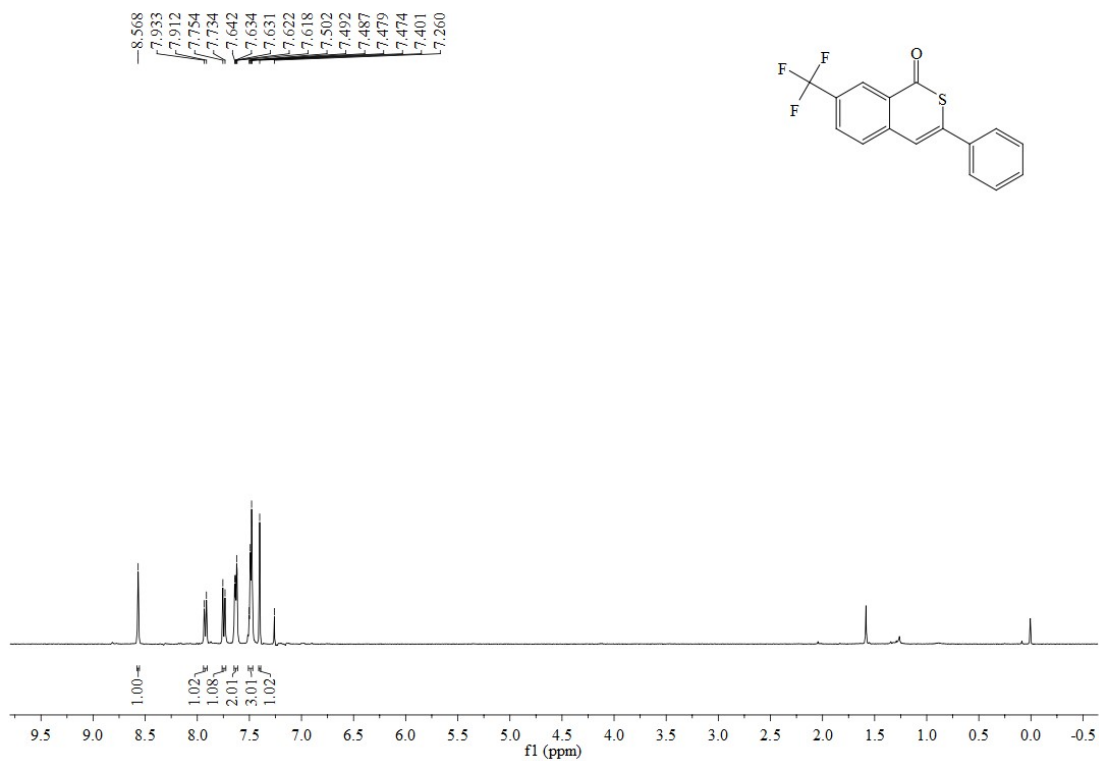

$^1\text{H}$  NMR 500 MHz, in  $\text{CDCl}_3$ : 3-phenyl-7-(trifluoromethyl)-1*H*-isothiochromen-1-one (25)

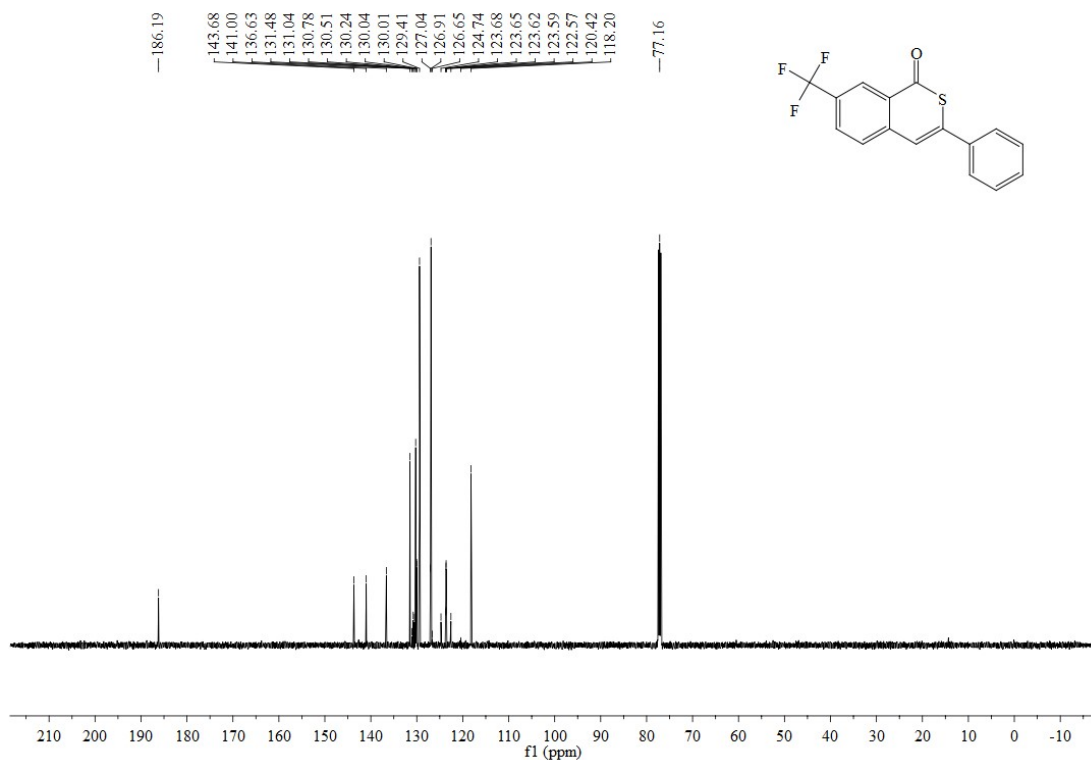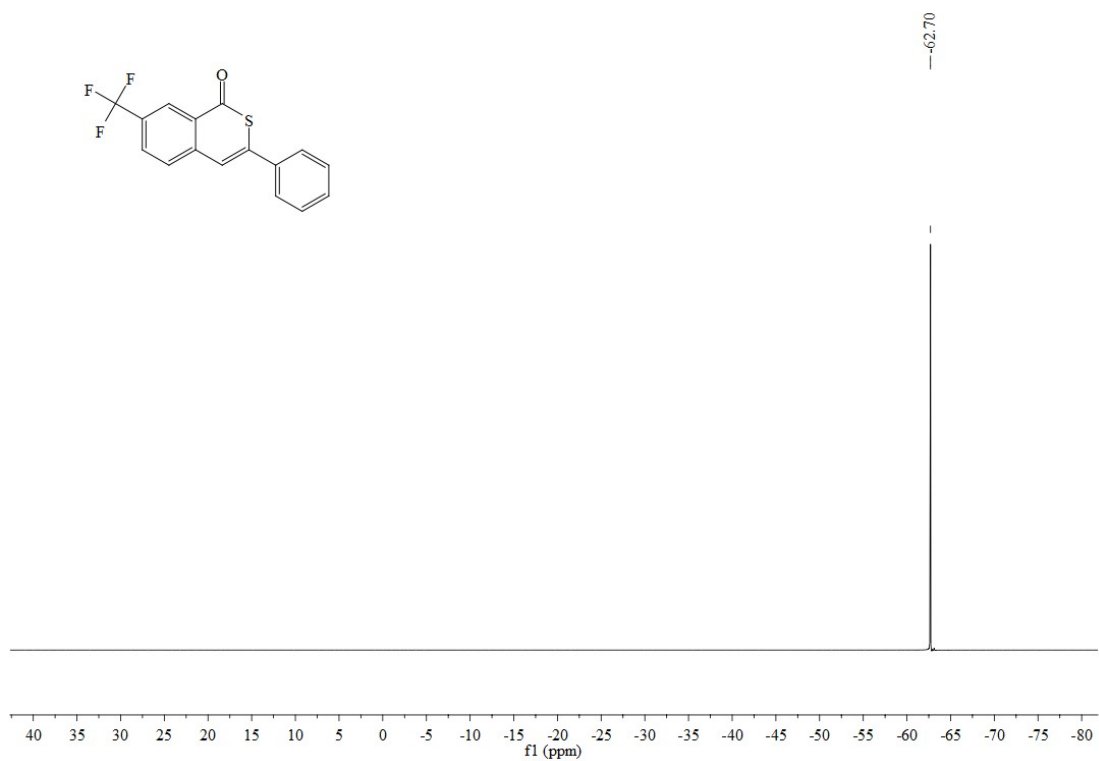



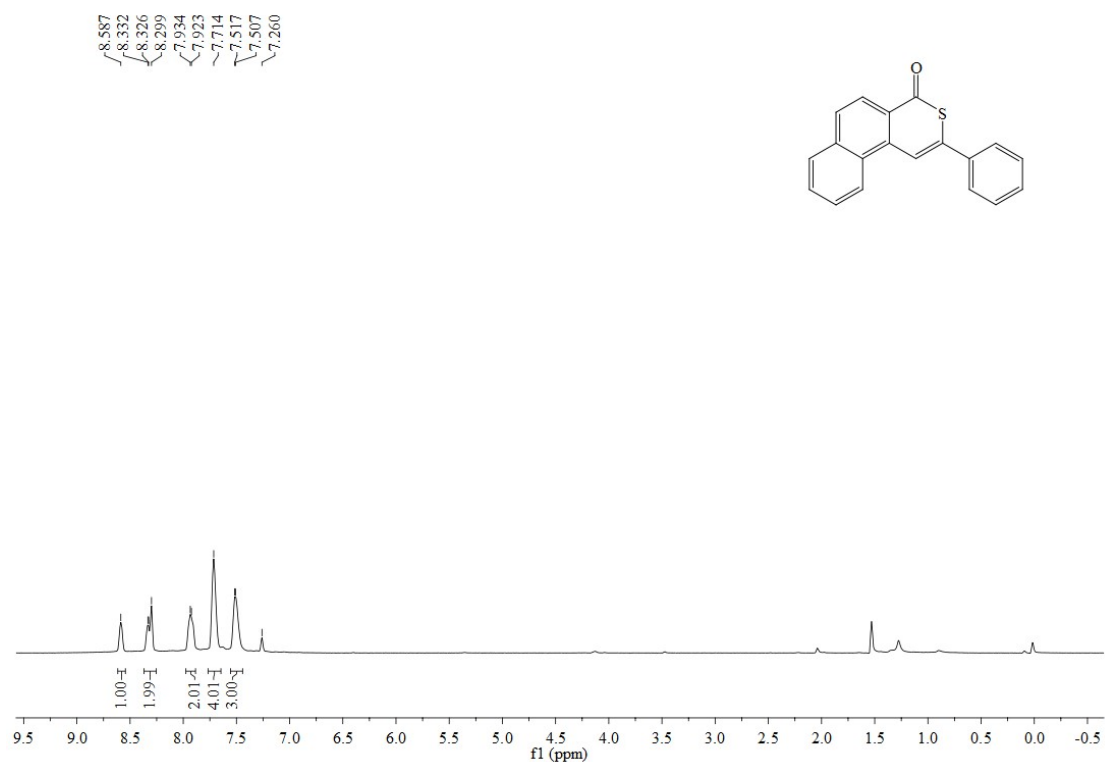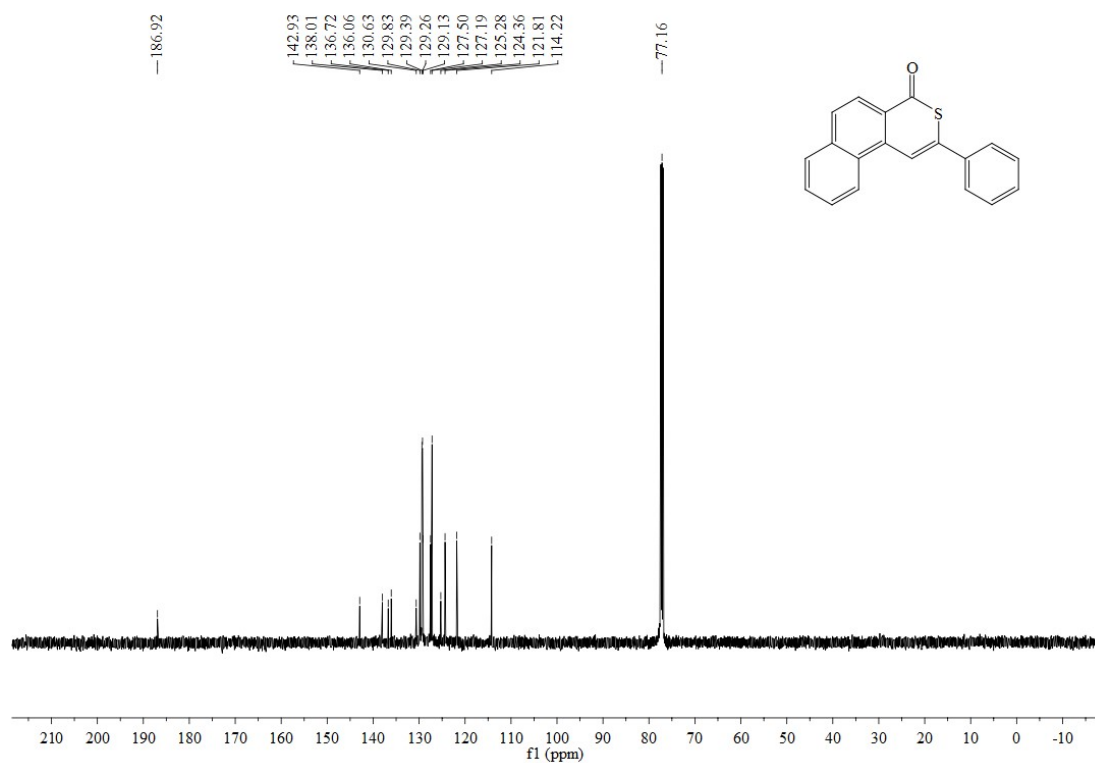

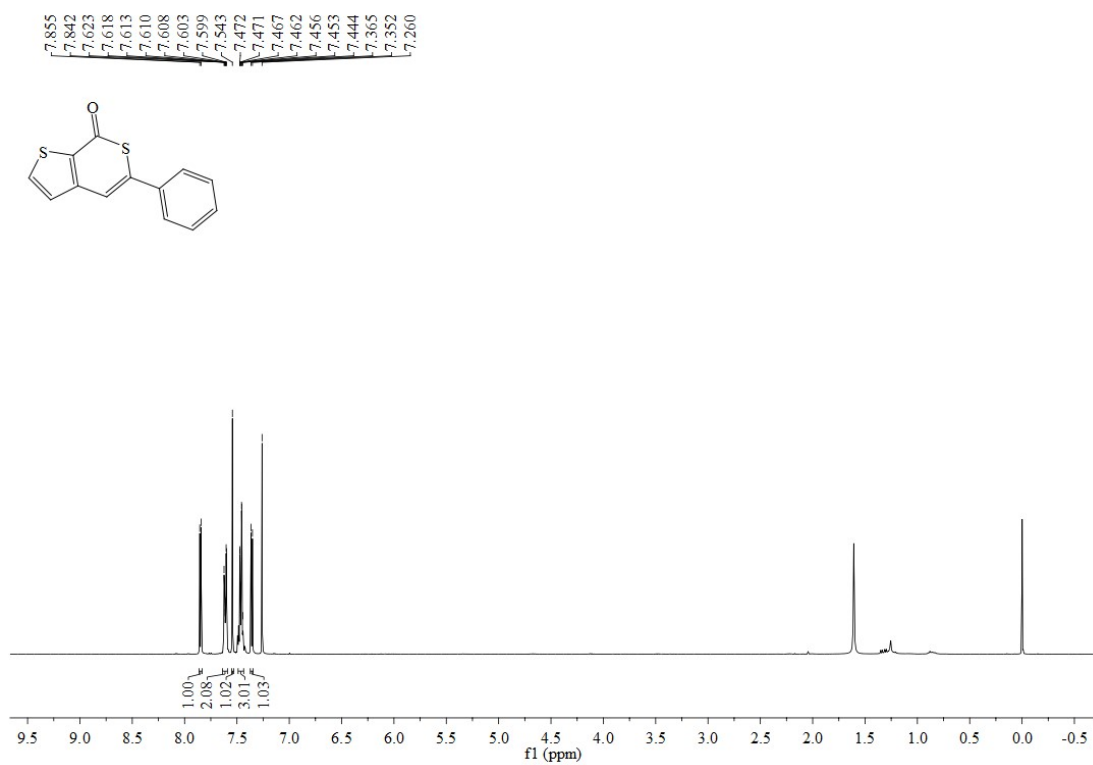

**$^1\text{H}$  NMR 400 MHz, in  $\text{CDCl}_3$ : 5-phenyl-7H-thieno[2,3-c]thiopyran-7-one (27)**

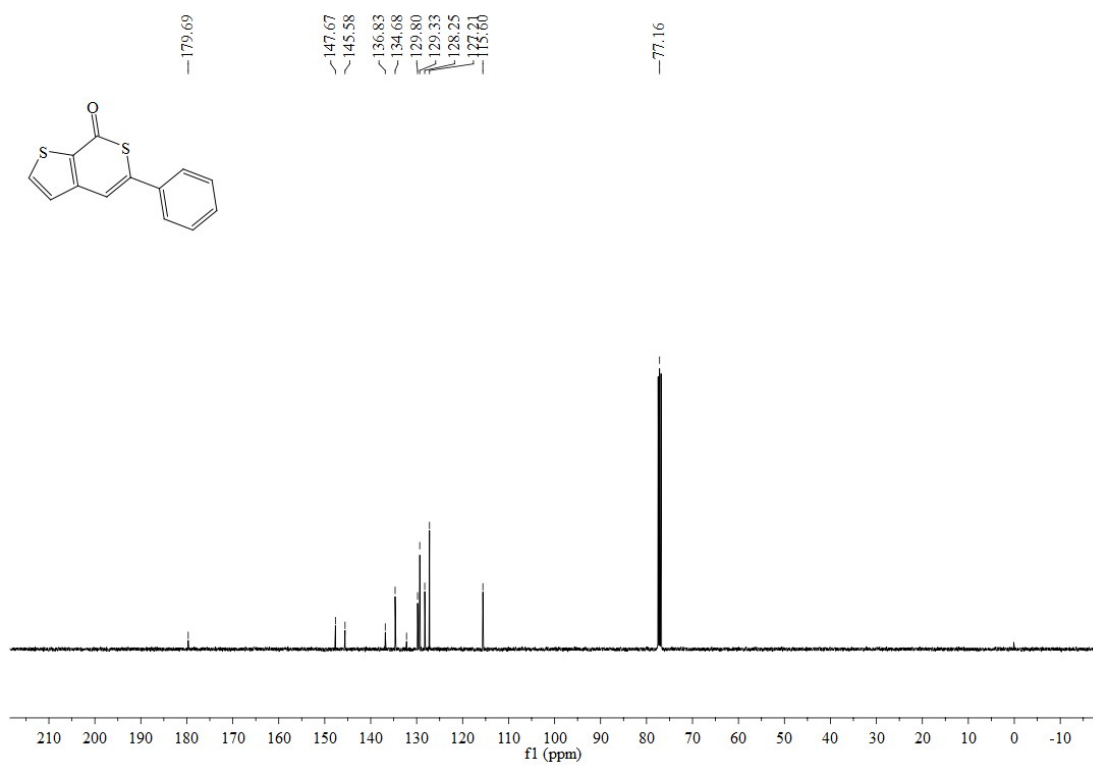

**$^{13}\text{C}\{^1\text{H}\}$  NMR 100 MHz, in  $\text{CDCl}_3$ : 5-phenyl-7H-thieno[2,3-c]thiopyran-7-one (27)**

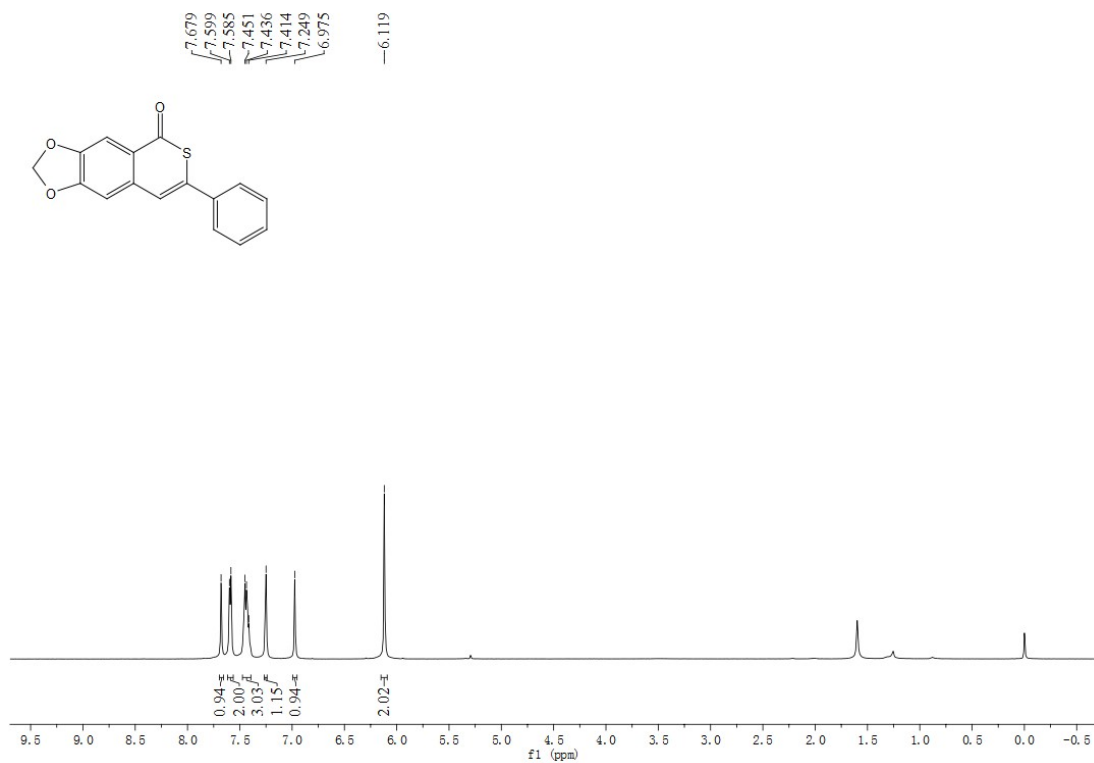

<sup>1</sup>H NMR 500 MHz, in CDCl<sub>3</sub>: 7-phenyl-5H-isothiochromeno[6,7-d][1,3]dioxol-5-one (28)

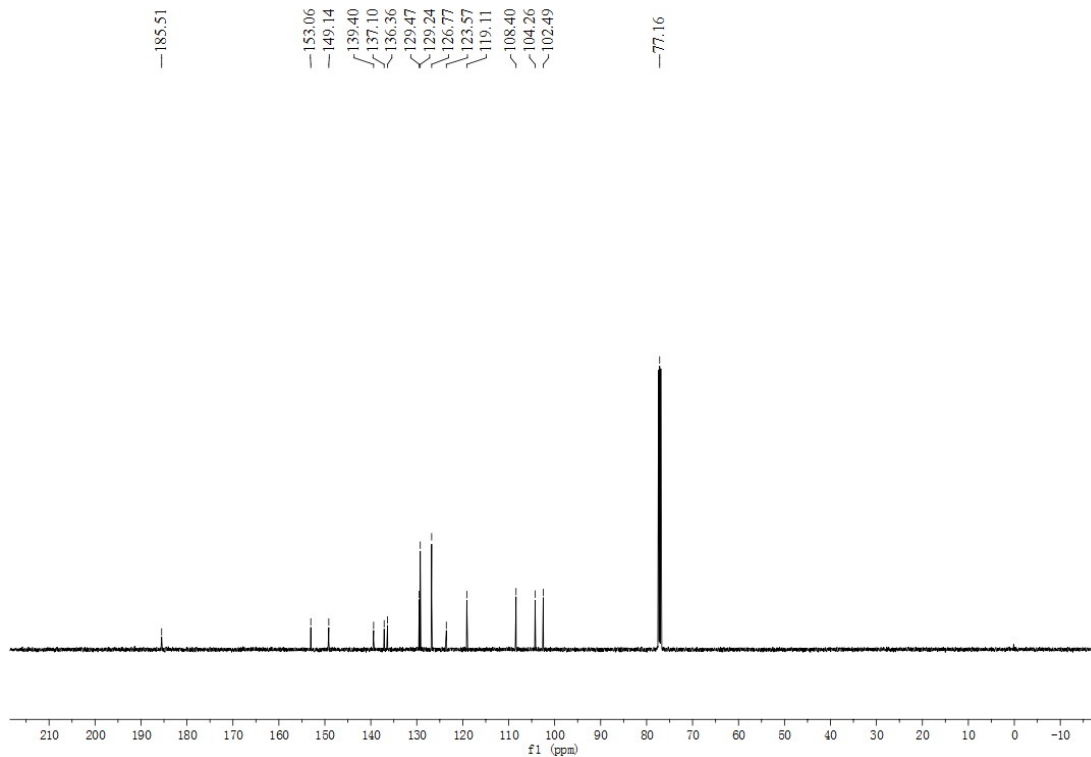

<sup>13</sup>C{<sup>1</sup>H} NMR 125 MHz, in CDCl<sub>3</sub>: 7-phenyl-5H-isothiochromeno[6,7-d][1,3]dioxol-5-one (28)

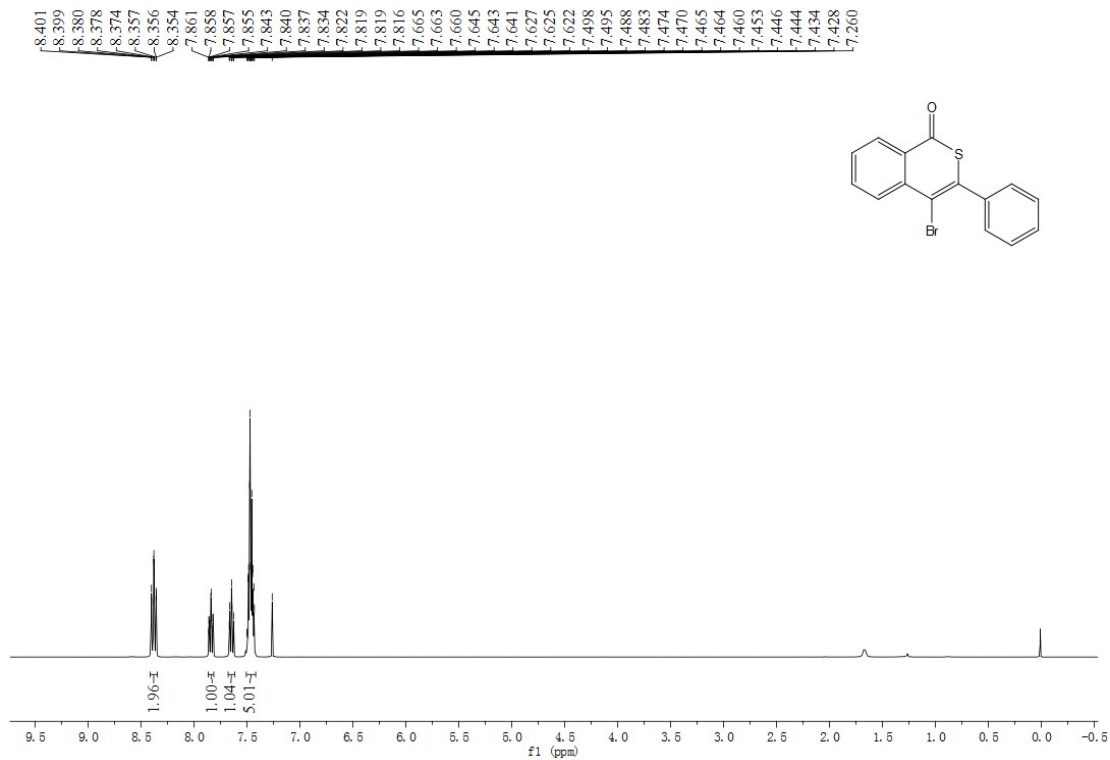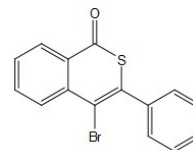

**<sup>1</sup>H NMR 400 MHz, in CDCl<sub>3</sub>: 4-bromo-3-phenyl-1*H*-isothiochromen-1-one (29)**

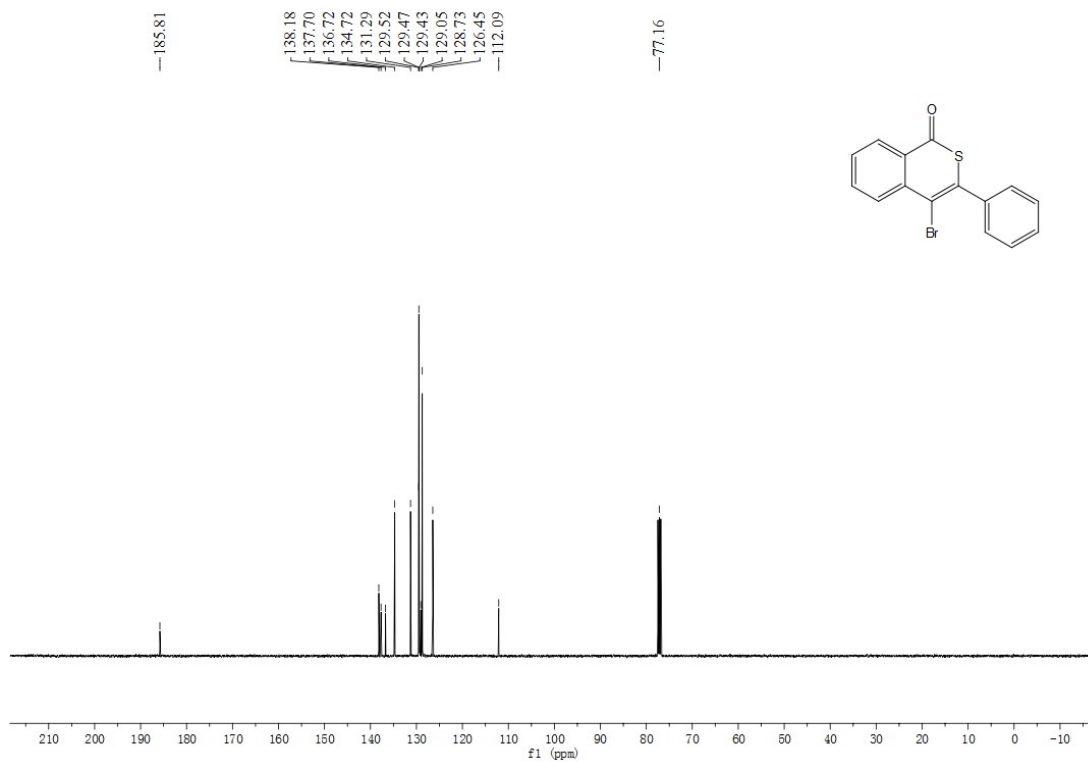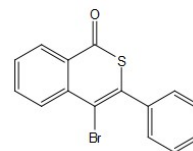

**<sup>13</sup>C{<sup>1</sup>H} NMR 100 MHz, in CDCl<sub>3</sub>: 4-bromo-3-phenyl-1*H*-isothiochromen-1-one (29)**

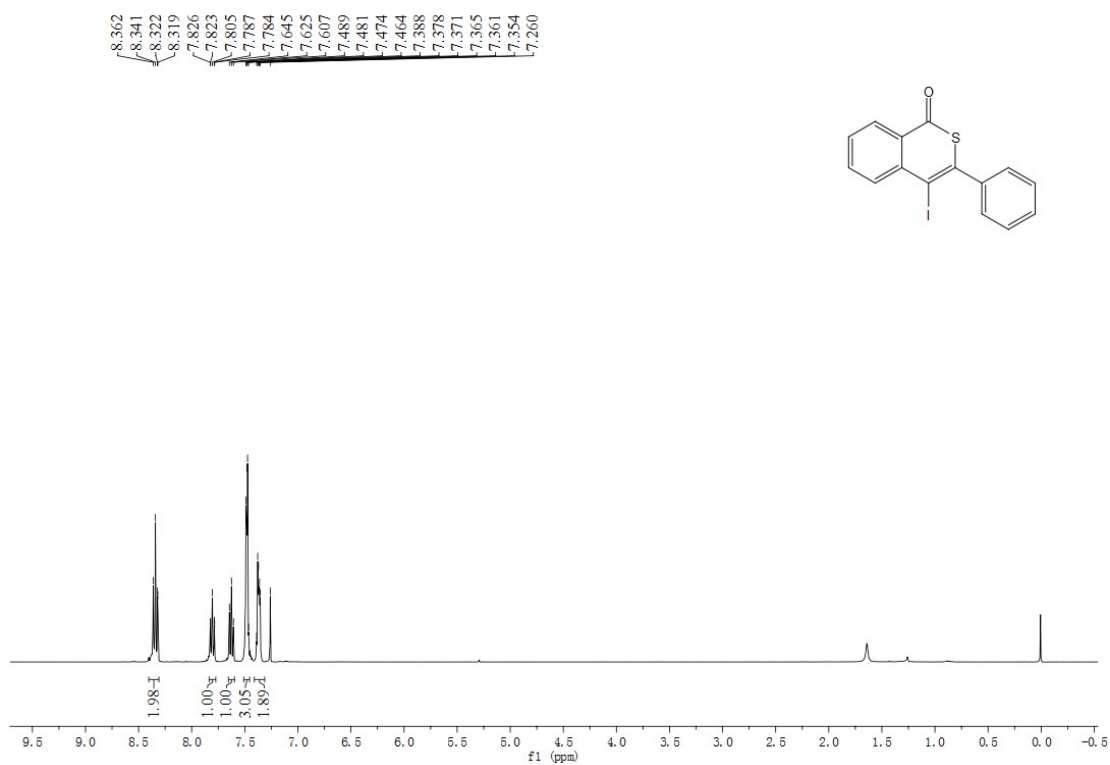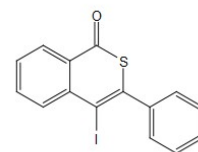

**<sup>1</sup>H NMR 400 MHz, in CDCl<sub>3</sub>: 4-iodo-3-phenyl-1*H*-isothiochromen-1-one (30)**

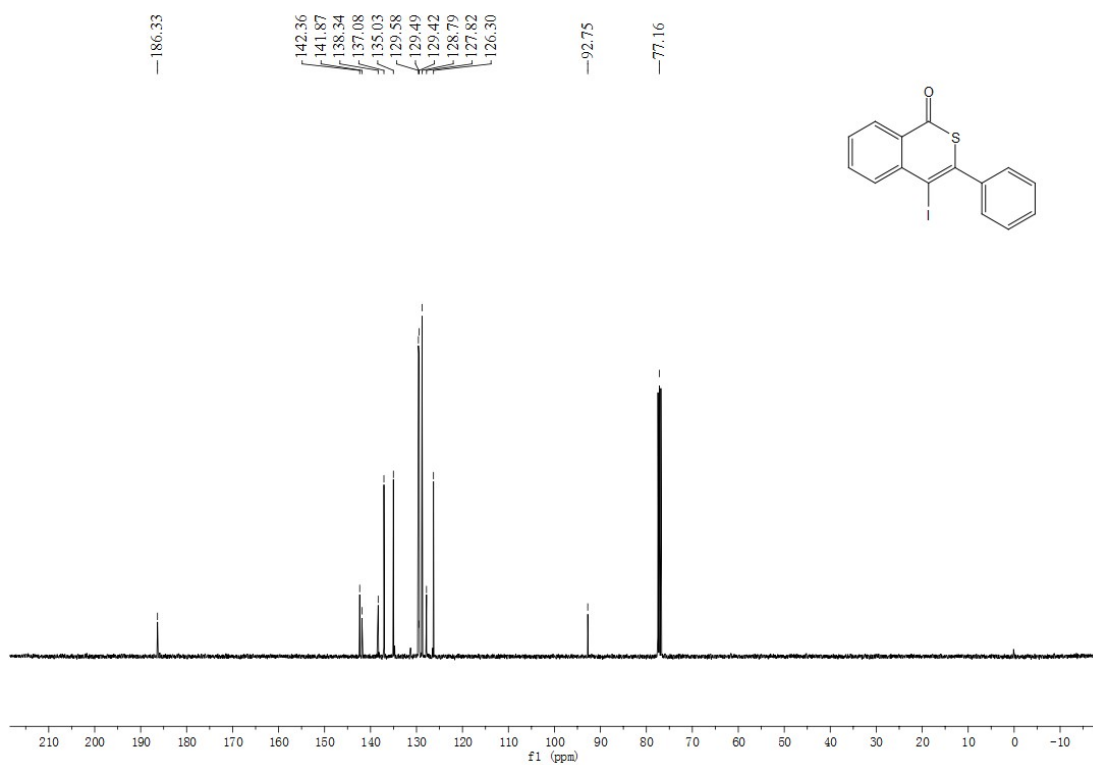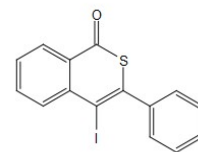

**<sup>13</sup>C{<sup>1</sup>H} NMR 100 MHz, in CDCl<sub>3</sub>: 4-iodo-3-phenyl-1*H*-isothiochromen-1-one (30)**

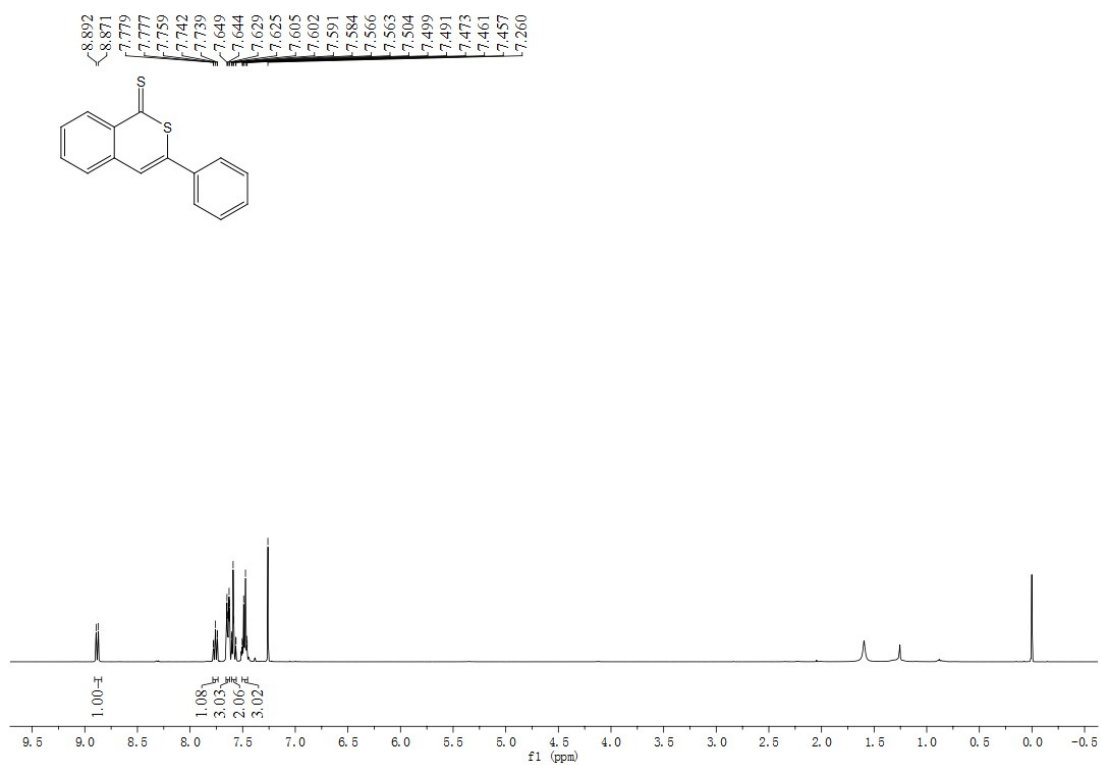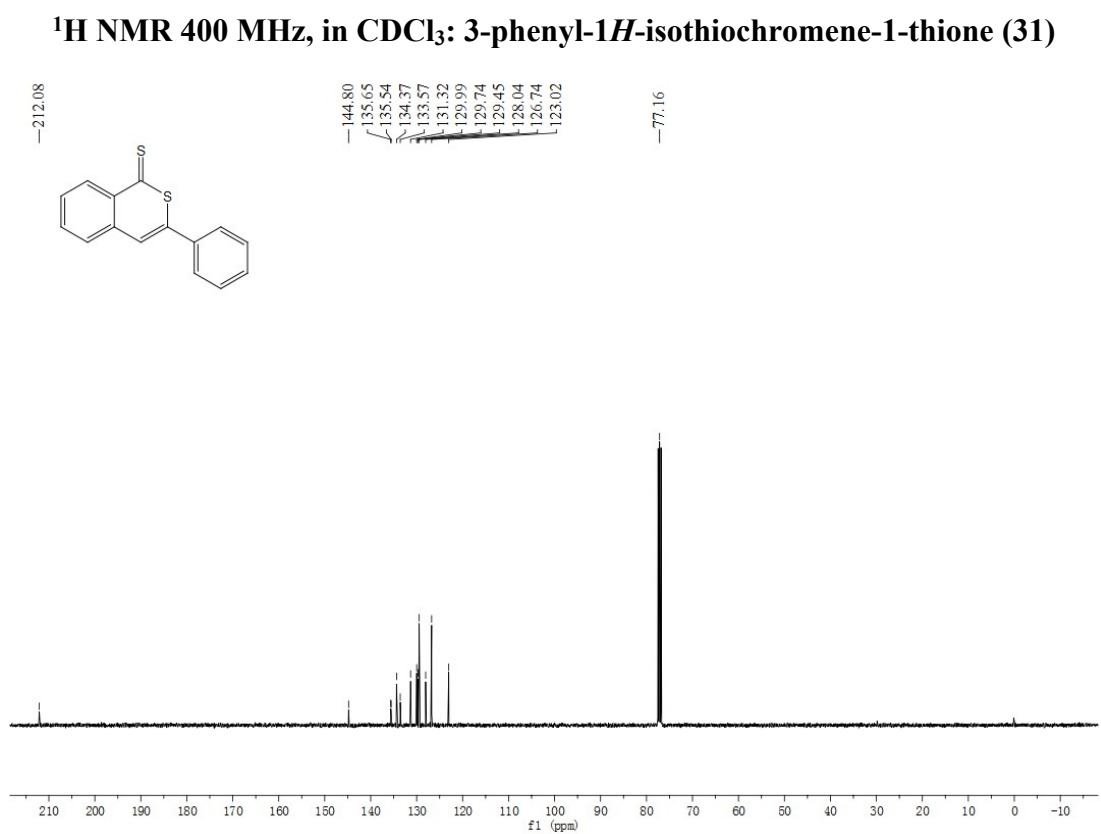

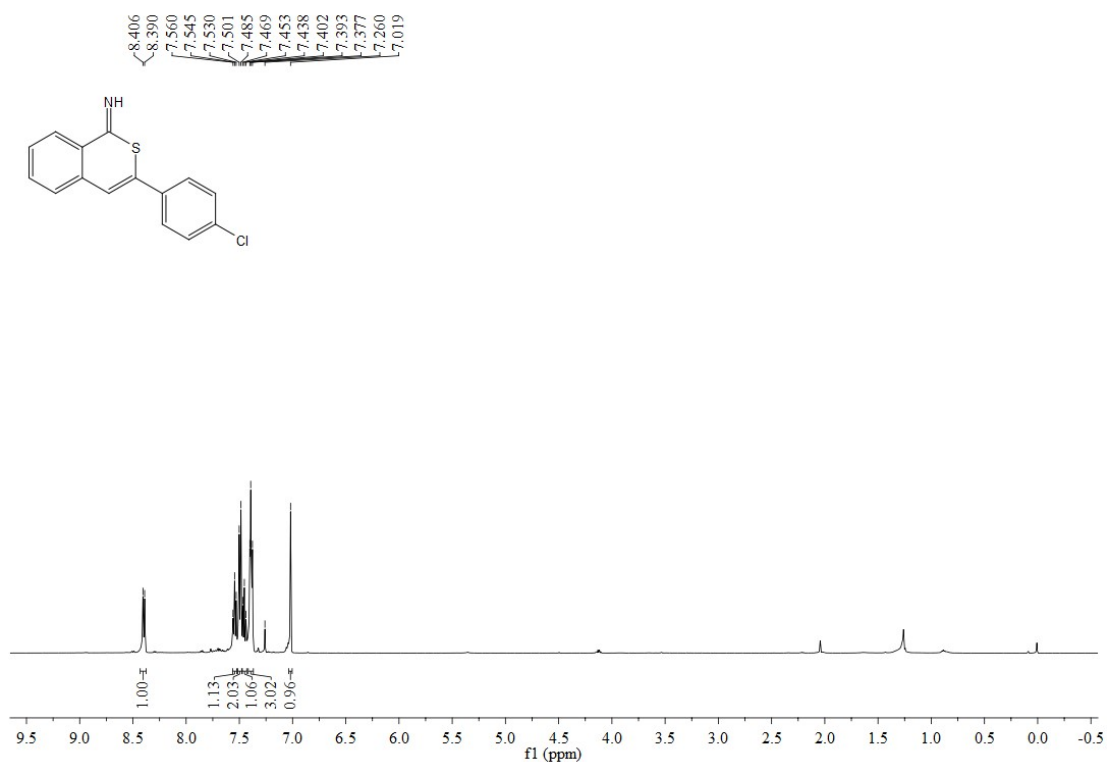

$^1\text{H}$  NMR 500 MHz, in  $\text{CDCl}_3$ : 3-(4-chlorophenyl)-1*H*-isothiochromen-1-imine (32)

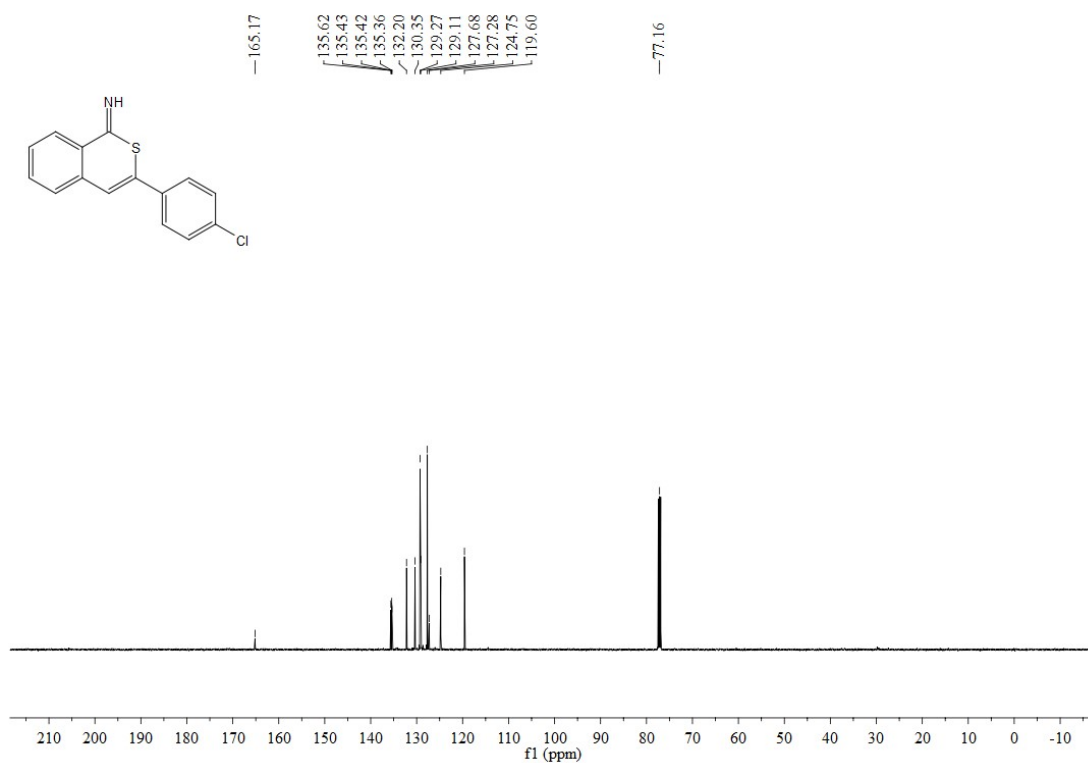

$^{13}\text{C}\{^1\text{H}\}$  NMR 125 MHz, in  $\text{CDCl}_3$ : 3-(4-chlorophenyl)-1*H*-isothiochromen-1-imine (32)

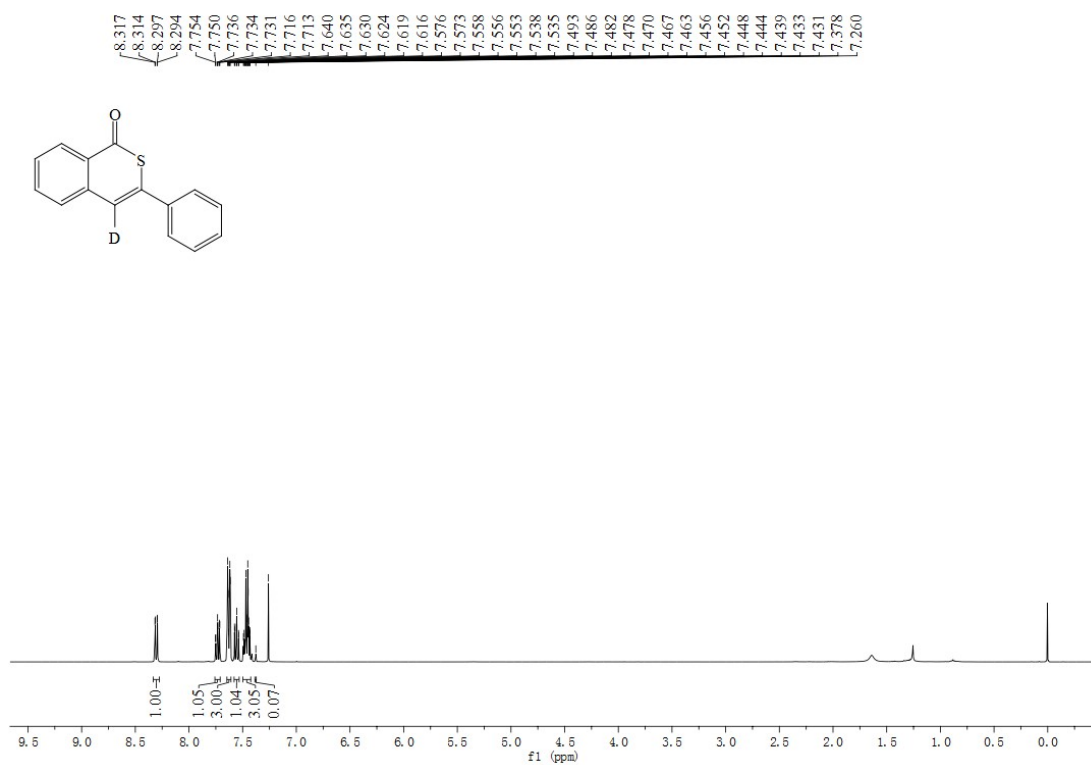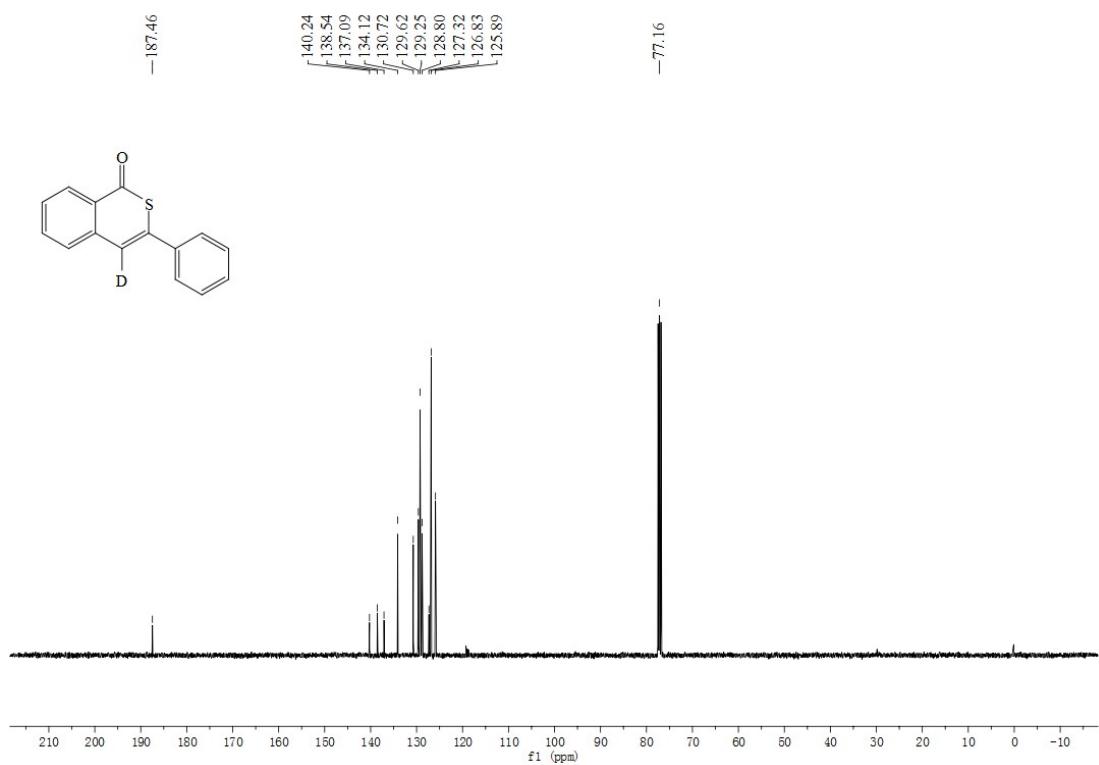



### 3. X-ray crystal structure and data of compound 3

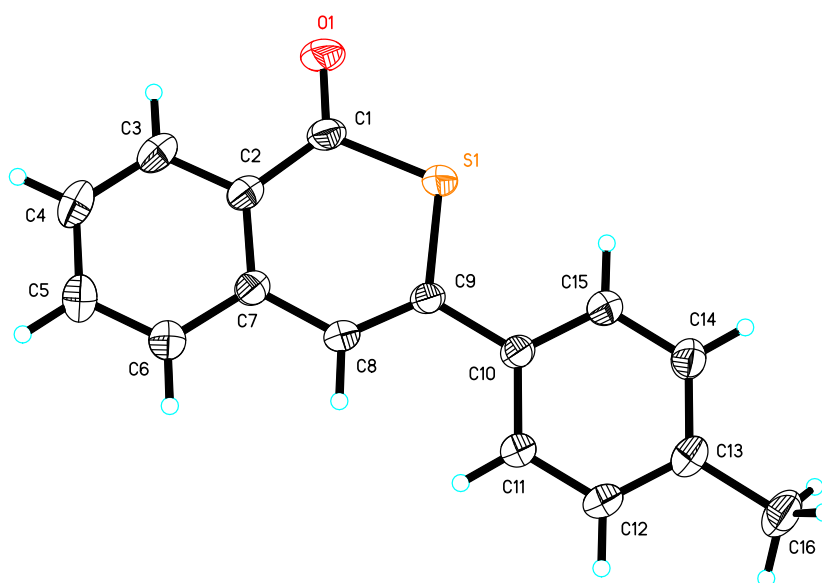

**The figure of compound 3**

The displacement ellipsoids are drawn at the 30% probability level

Single crystals suitable for X-ray analysis were obtained by slow evaporation of mixed petroleum ether: ethyl acetate (5:1, v:v).

Sheldrick, G. M.; SHELXL-97, Program for X-ray Crystal Structure Solution and Refinement, University of Göttingen: Germany, 1997.

Sheldrick, G.M. SHELXTL. *Structure Determination Software Programs. Version 6.14. Bruker AXS. Madison, Wisconsin, USA 2000.*

Supplementary crystallographic data was deposited at the Cambridge Crystallographic Data Centre (CCDC) under the number CCDC- 2084840 (**3**) and can be obtained free of charge *via* [www.ccdc.cam.ac.uk/data\\_request.cif](http://www.ccdc.cam.ac.uk/data_request.cif).

**Table S1: Crystal Structure and Data Refinement Parameters of compound 3**

| Compound                               | 3                                   |
|----------------------------------------|-------------------------------------|
| Empirical Formula                      | C <sub>16</sub> H <sub>12</sub> O S |
| Formula Weight                         | 252.32                              |
| Crystal System / Space Group           | Triclinic, P -1                     |
| a / Å                                  | 7.2215(3)                           |
| b / Å                                  | 8.8635(4)                           |
| c / Å                                  | 9.7122(4)                           |
| $\alpha$ / °                           | 91.3540(10)                         |
| $\beta$ / °                            | 92.0140(10)                         |
| $\gamma$ / °                           | 92.341(2)                           |
| V / Å <sup>3</sup>                     | 620.56(5)                           |
| Z                                      | 2                                   |
| D <sub>calc</sub> (Mg/m <sup>3</sup> ) | 1.350                               |
| $\mu$ (mm <sup>-1</sup> )              | 0.244                               |
| Crystal size (mm)                      | 0.200 x 0.150 x 0.110               |
| Color / Shape                          | yellow                              |
| Temp (K)                               | 293(2)                              |
| Theta range for collection             | 3.076 to 26.000°                    |
| Reflections collected                  | 8960                                |
| Independent reflections                | 2401                                |
| Data/restraints/parameters             | 2401 / 0 / 164                      |
| Goodness of fit on F <sup>2</sup>      | 1.066                               |
| Final R indices [I > 2 $\sigma$ (I)]   | R1 = 0.0375, wR2 = 0.1070           |
| R indices (all data)                   | R1 = 0.0416, wR2 = 0.1117           |
| Largest difference peak/hole           | 0.238 and -0.168                    |
